# Supplementary material for: Visible light induced boryl radical and its application in reduction of unsaturated XO (X = C, N, S) bonds
Source: Royal Society of Chemistry journal article supplement (doi:10.1039/d3qo00808h), 2023-01-01
Supplement: d3qo00808h1.pdf [file d3qo00808h1.pdf]

## Visible Light Induced Boryl Radical and the Application in Reduction of Unsaturated X=O (X=C, N, S) Bonds

Lingfeng Yin<sup>†</sup>, Guanglong Huang<sup>†</sup>, Xiuhua Lin<sup>†</sup>, Xinluo Song<sup>†</sup>, Yanqi Chen<sup>†</sup>,  
Tianhong Yan<sup>†</sup>, Mingde Li<sup>†,\*</sup>, Li Dang<sup>†,\*</sup>

<sup>†</sup>Department of Chemistry and Key Laboratory for Preparation and Application of Ordered Structural  
Materials of Guangdong Province, Shantou University, Guangdong 515063, P. R. China

*Supporting Information Placeholder*

Email: [mdli@stu.edu.cn](mailto:mdli@stu.edu.cn), [ldang@stu.edu.cn](mailto:ldang@stu.edu.cn)

### *Table of contents*

|                                 |    |
|---------------------------------|----|
| 1. General information.....     | 2  |
| 2. Spectroscopy study.....      | 2  |
| 3. Mechanism study .....        | 4  |
| 4. Experimental procedure ..... | 6  |
| 5. Computational details.....   | 16 |
| 6. NMR spectra.....             | 32 |
| 7. References.....              | 61 |

# 1. General information

## Chromatography and Instrumentation

All NMR spectra were recorded at 25 °C. Chemical shifts ( $\delta$ ) are given in parts per million (ppm) and referenced to  $\text{CDCl}_3$  ( $^1\text{H}$ : 7.26 ppm,  $^{13}\text{C}$ : 77.16) or  $\text{DMSO-d}_6$  ( $^1\text{H}$ : 2.50 ppm,  $^{13}\text{C}$ : 39.52). Coupling constants ( $J$ ) are given in Hertz (Hz) and refer to apparent multiplicities (s = singlet, br. s = broad singlet, d = doublet, t = triplet, q = quartet, quin = quintet, sex = sextet, h = heptet, m = multiplet, dd = doublet of doublets, etc.). The  $^1\text{H}$  NMR spectra are reported as follows: chemical shift (multiplicity, coupling constants, number of protons)

## Femtosecond transient absorption (fs-TA) experiments

The fs-TA measurements were performed based on a femtosecond Ti: Sapphire regenerative amplifier laser system (Coherent, Astrella-Tunable-F-1k) and femtosecond transient absorption spectrometer system (Ultrafast Systems, Helios Fire). The laser probe pulse was produced with ~4% of the amplified 800 nm laser pulses to generate a white-light continuum (320–800 nm) in a  $\text{CaF}_2$  crystal and then this probe beam was split into two parts before traversing the sample. One probe laser beam goes through the sample while the other probe laser beam goes to the reference spectrometer to monitor the fluctuations in the probe beam intensity. The instrument response function was determined to be ca. 120 fs. At each temporal delay, data were averaged for 2 s and collected by the acquisition system. For the experiments described in this study, the sample solution was excited by a 365 nm pump beam with a power of 0.2 mW (from TOPAS). The sample solutions were excited in a 2 mm path-length cuvette. The data were stored as three-dimensional (3D) wavelength-time-absorbance matrices that were exported for use with the fitting software. Chirp correction was done for all the data shown here. The kinetics of all fs-TA spectra were fitted by single-wavelength fitting via Surface Explorer software; all the error values were shown with 90% confidence intervals.

# 2. Spectroscopy Study

## Spectroscopy study of boryl radical

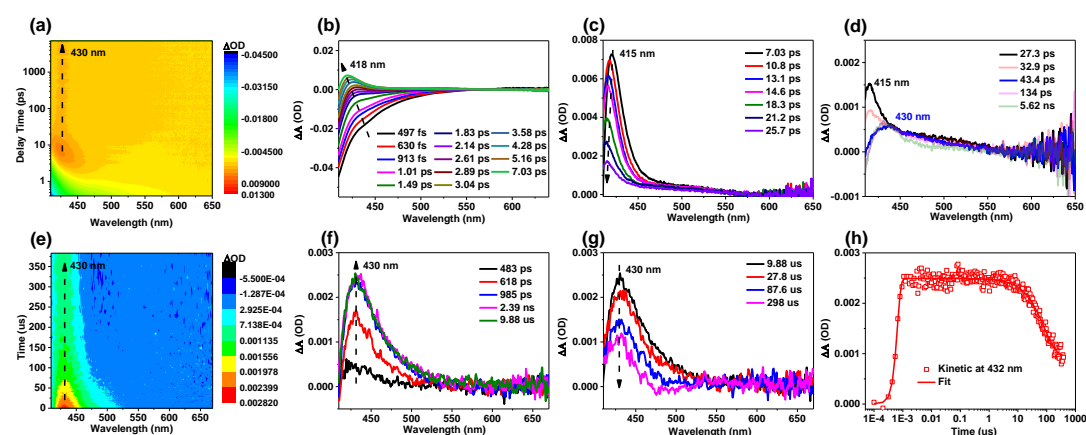

**Figure S1.** The transient spectra of mechanism study of boryl radical generation. (a)-(d) The fs-TA spectra of  $\text{B}_2\text{cat}_2$ , 4-cyanopyridine in DMF under 400 nm irradiation; (e)-(g) The ns-TA spectra of  $\text{B}_2\text{cat}_2$  and 4-cyanopyridine in DMF under 400 nm irradiation; (h) The excited state kinetics and fitting results at 432 nm.

## Spectroscopy study of reductive hydrogenation of aromatic ketone

### (a) The ns-TA spectra of benzophenone under 266 nm irradiation

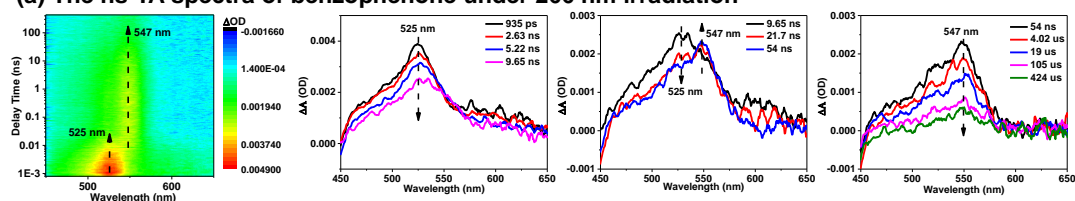

### (b) The fs-TA spectra of reaction mixture under 266 nm irradiation

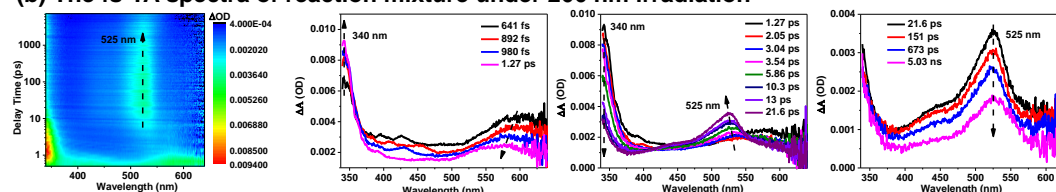

### (c) The fs-TA spectra of reaction mixture under 365 nm irradiation

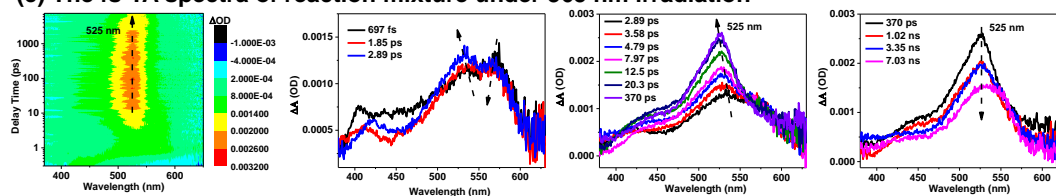

### (d) The fs-TA spectra of reaction mixture under 400 nm irradiation

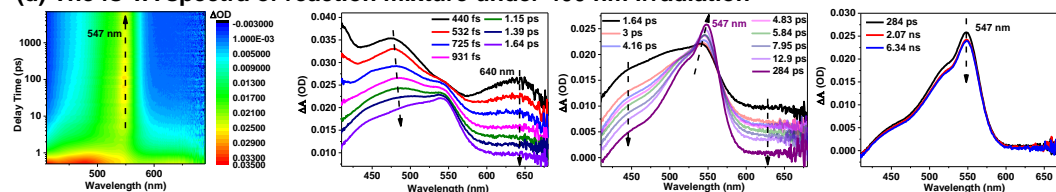

**Figure S2.** The transient spectra of mechanism study of reductive hydrogenation of aromatic ketone to aromatic pinacol. (a) The ns-TA spectra of benzophenone in THF/isopropanol under 266 nm irradiation; (b) The fs-TA spectra of benzophenone, B<sub>2</sub>cat<sub>2</sub> and 4-cyanopyridine in THF/H<sub>2</sub>O under 266 nm irradiation; (c) The fs-TA spectra of benzophenone, B<sub>2</sub>cat<sub>2</sub> and 4-cyanopyridine in THF/H<sub>2</sub>O solution under 365 nm irradiation; (d) The fs-TA spectra of benzophenone, B<sub>2</sub>cat<sub>2</sub> and 4-cyanopyridine in THF/H<sub>2</sub>O under 400 nm irradiation.

## Computational Results

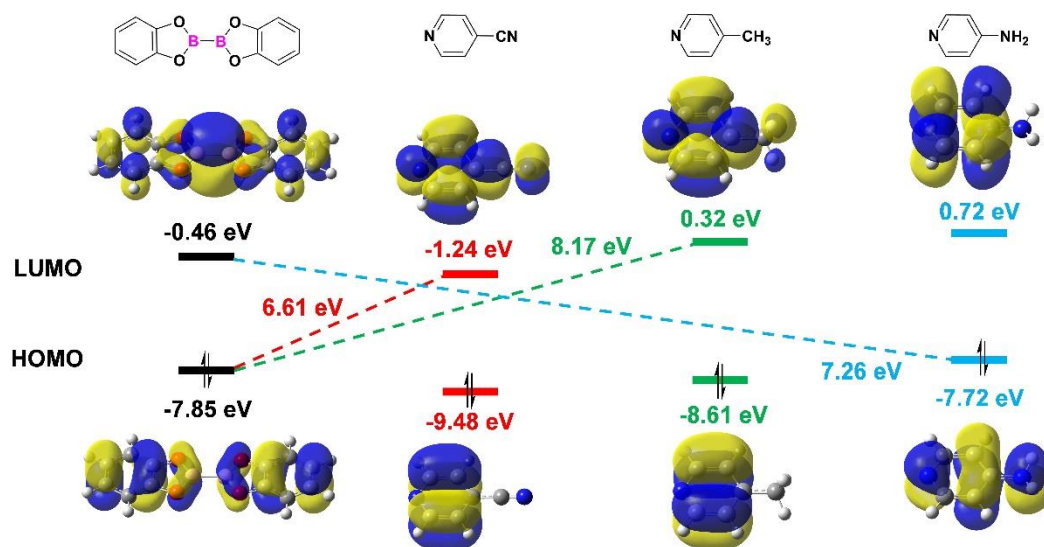

**Figure S3.** Frontier molecular orbital analysis for B<sub>2</sub>cat<sub>2</sub>, 4-cyanopyridine Energy profile for mechanism of reductive deoxygenation of sulfoxides to sulfides (solvent correction with M062x/6-311++G(d,p) in THF based on optimized geometry with M062x/6-311G(d)).

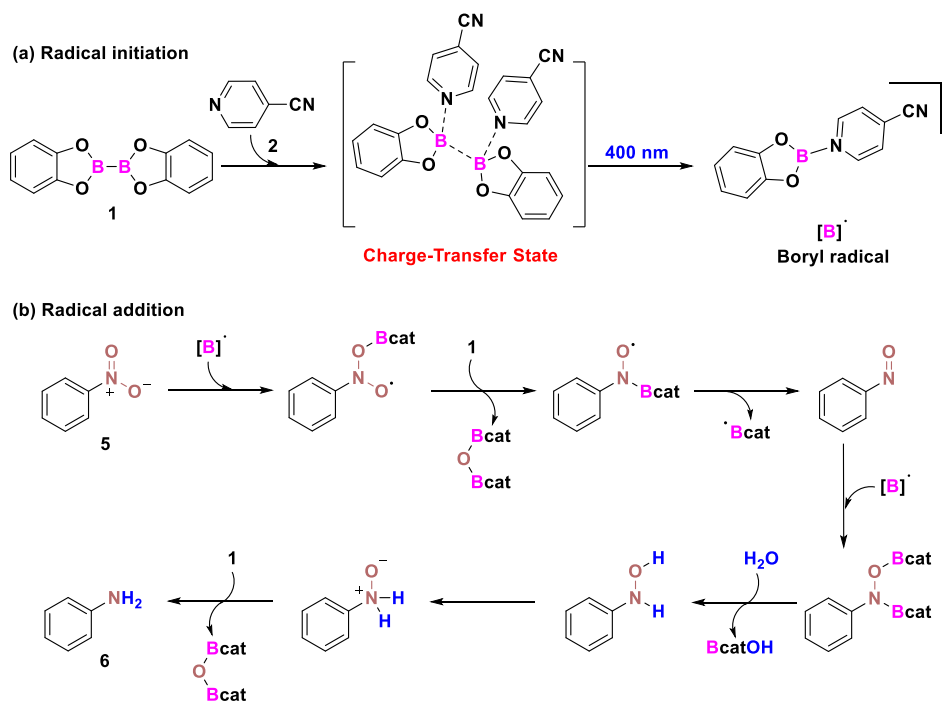

**Scheme S1.** Proposed mechanism of reductive hydrogenation of nitroaromatic compounds to aromatic arylamines.

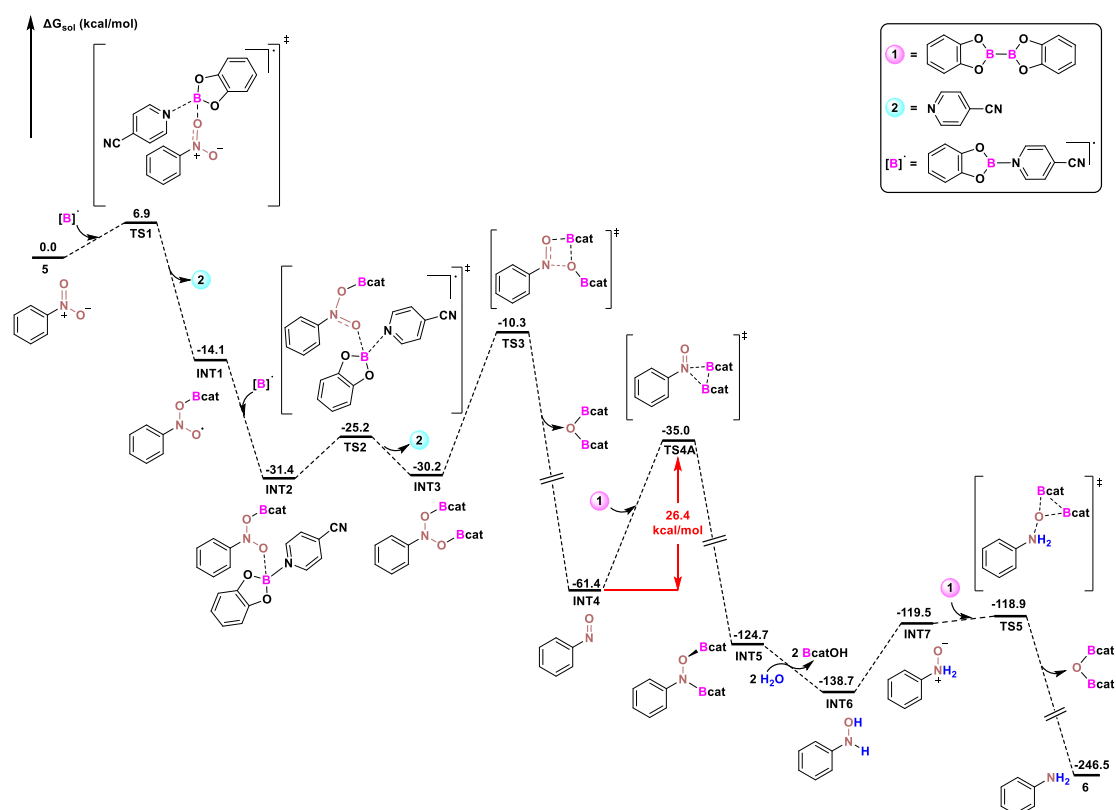

**Figure S4.** Energy profile for unfavorable pathway of reductive hydrogenation of nitroaromatic compounds to aromatic arylamines (solvent correction with M062x/6-311++G(d,p) in THF based on optimized geometry with M062x/6-311G(d)).

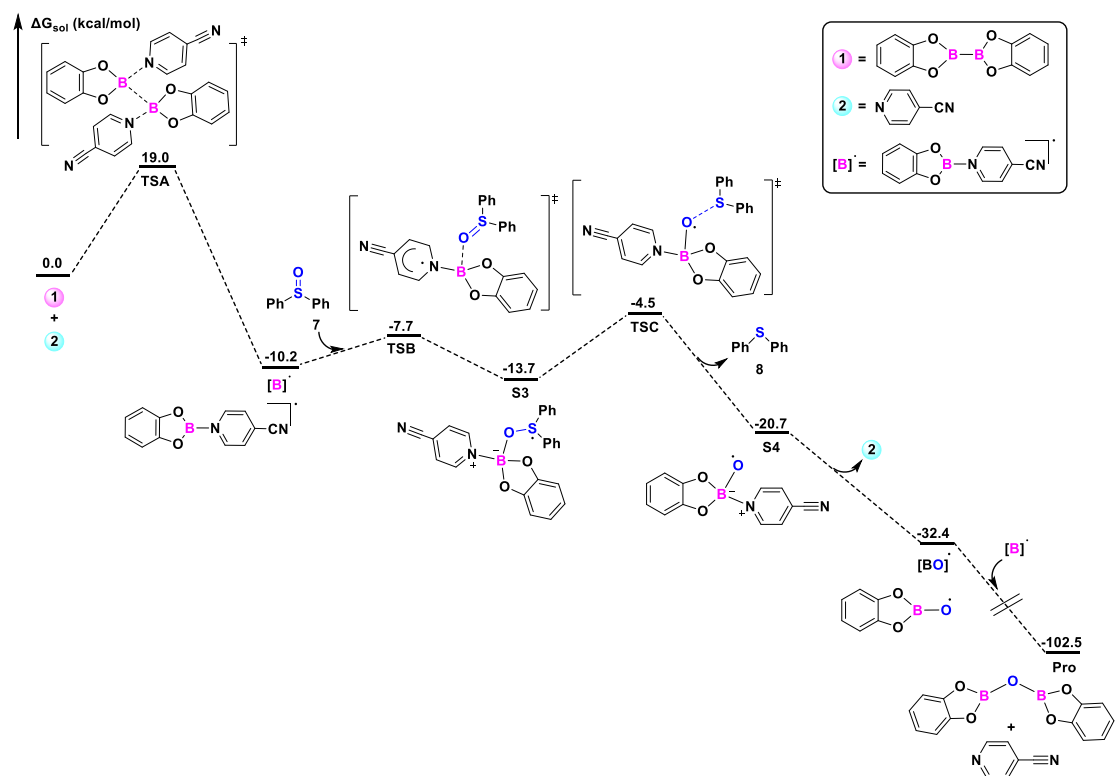

**Figure S5.** Energy profile for reductive deoxygenation of sulfoxides to sulfides by boryl radical (solvent

correction with M062x/6-311++G(d,p) in THF based on optimized geometry with M062x/6-311G(d).

### 3. Experimental procedure

#### General Procedures

1) General Procedure 1 (GP1): Conversion of aromatic Ketone to aromatic Pinacol

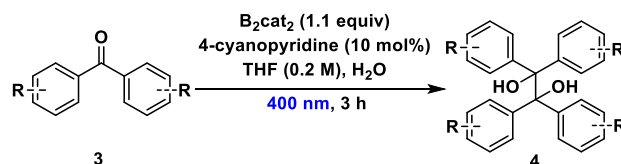

Aromatic ketone (1.0 eq., 0.4 mmol),  $B_2cat_2$  (104 mg, 1.1 eq., 0.44 mmol) and 4-cyanopyridine (4 mg, 10 mol%) are carefully weighed into a flame-dried 15 mL tube containing a small magnetic stirrer bar. THF (2.0 mL, 0.2 M) and  $H_2O$  (0.1 mL) are added in the glovebox. The tube is tightly sealed and stirred under blue LED irradiation for 3 hours. Irradiation is stopped and the reaction mixture is extracted with ethyl acetate (30 + 15 mL), washed with brine (30 mL), dried over  $MgSO_4$ , and concentrated under reduced pressure. The crude product is purified by flash column chromatography on silica gel (hexane: ethyl acetate = 30:1 ~ 10:1).

2) General Procedure 2 (GP2): Reduction of nitroaromatic compound to arylamines

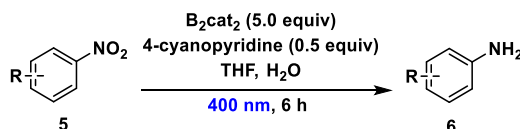

Nitroaromatic compound (1.0 eq., 0.2 mmol),  $B_2cat_2$  (237.4 mg, 5.0 eq., 1 mmol) and 4-cyanopyridine (10.4 mg, 0.5 eq., 0.1 mmol) are carefully weighed into a flame-dried 15 mL tube containing a small magnetic stirrer bar. THF (3.0 mL) and  $H_2O$  (0.2 mL) are added in the glovebox. The tube is tightly sealed and stirred under blue LED irradiation for 0.5 hour. Irradiation is stopped and the reaction mixture is extracted with ethyl acetate (30 + 15 mL), washed with brine (30 mL), dried over  $MgSO_4$ , and concentrated under reduced pressure. The crude product is purified by flash column chromatography on silica gel (hexane: ethyl acetate = 30:1~8:1).

3) General Procedure 3 (GP3): Reductive deoxygenation of sulfoxides to sulfides

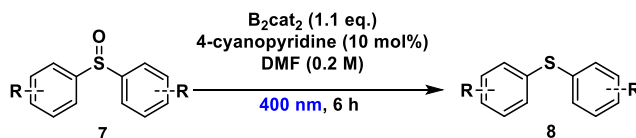

Sulfoxides (1.0 eq., 0.4 mmol),  $B_2cat_2$  (104 mg, 1.1 eq., 4.4 mmol) and 4-cyanopyridine (4 mg, 10 mol%) are carefully weighed into a flame-dried 15 mL tube containing a small magnetic stirrer bar. DMF (2.0 mL) are added in the glovebox. The tube is tightly sealed and stirred under blue LED irradiation for 6 hours. Irradiation is stopped and the reaction mixture is extracted with ethyl acetate (30 + 15 mL), washed with brine (30 mL), dried over  $MgSO_4$ , and concentrated under reduced pressure. The crude product is purified by flash column chromatography on silica gel (hexane: ethyl acetate = 100:1).

## Generation of aromatic pinacol

(1) Conversion of aromatic ketone **3a** to aromatic pinacol **4a**.

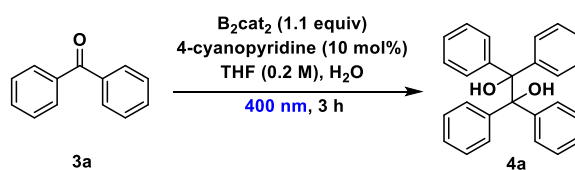

According to GP1, the reaction is carried out with **3a** (73 mg, 0.40 mmol),  $B_2cat_2$  (104 mg, 0.44 mmol) and 4-cyanopyridine (4 mg, 10 mol%) in THF (2 mL, 0.2M), and 0.1 mL  $H_2O$  are added into the tube. Purification by flash column chromatography (hexane: ethyl acetate = 12:1) give the desired product **4a** (65 mg, 90% yield) as a white powder.

$^1H$  NMR (400 MHz,  $CDCl_3$ )  $\delta$  7.32-7.30 (d, 8H), 7.20 (s, 12H), 3.06 (s, 2H).

$^{13}C$  NMR (125 MHz,  $CDCl_3$ )  $\delta$  144.17, 128.60, 127.30, 126.95, 83.02.

(2) Conversion of Aromatic ketone **3b** to aromatic pinacol **4b**.

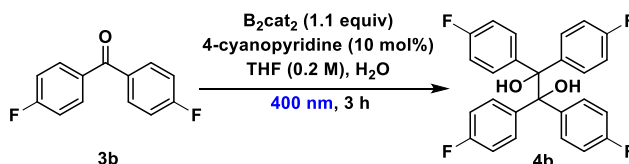

According to GP1, the reaction is carried out with **3b** (88 mg, 0.40 mmol),  $B_2cat_2$  (104 mg, 0.4 mmol) and 4-cyanopyridine (4 mg, 10 mol%) in THF (2 mL, 0.2 M) and 0.1 mL  $H_2O$  are added into the tube. Purification by flash column chromatography (hexane: ethyl acetate = 8:1) give the desired product **4b** (81 mg, 94% yield) as a white powder.

$^1H$  NMR (400 MHz,  $CDCl_3$ )  $\delta$  7.26-7.22 (m, 8H), 6.90-6.85 (t, 8H), 2.86 (s, 1.86H).

$^{13}C$  NMR (125 MHz,  $CDCl_3$ )  $\delta$  163.04, 160.57, 139.66, 139.62, 130.32, 130.25, 114.42, 114.21.

(3) Conversion of aromatic ketone **3c** to aromatic pinacol **4c**.

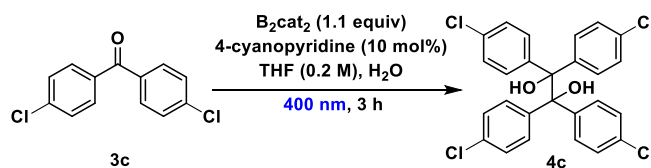

According to GP1, the reaction is carried out with **3c** (100 mg, 0.40 mmol),  $B_2cat_2$  (104 mg, 0.4 mmol) and 4-cyanopyridine (4 mg, 10 mol%) in THF (2 mL, 0.2 M) and 0.1 mL  $H_2O$  are added into the tube. Purification by flash column chromatography (hexane: ethyl acetate = 20:1) give the desired product **4c** (82 mg, 80% yield) as a white powder.

$^1H$  NMR (400 MHz,  $CDCl_3$ )  $\delta$  7.23-7.21 (d, 8H), 7.18-7.16 (d, 8H), 2.89 (s, 1.75H).

$^{13}C$  NMR (125 MHz,  $CDCl_3$ )  $\delta$  142.01, 133.49, 129.86, 127.74, 82.49.

(4) Conversion of aromatic ketone **3d** to aromatic pinacol **4d**.

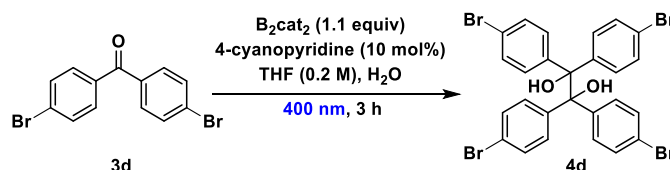

According to GP1, the reaction is carried out with **3d** (136 mg, 0.40 mmol), B<sub>2</sub>cat<sub>2</sub> (104 mg, 0.4 mmol) and 4-cyanopyridine (4 mg, 10 mol%) in THF (2 mL, 0.2 M) and 0.1 mL H<sub>2</sub>O are added into the tube. Purification by flash column chromatography (hexane: ethyl acetate = 20:1) give the desired product **4d** (110 mg, 81% yield) as a white powder.

<sup>1</sup>H NMR (400 MHz, CDCl<sub>3</sub>) δ 7.33-7.31 (d, 7.98H), 7.16-7.14 (d, 8.01H), 2.88 (s, 1.80H).

<sup>13</sup>C NMR (125 MHz, CDCl<sub>3</sub>) δ 142.43, 130.72, 130.18, 121.82, 82.51.

(5) Conversion of aromatic ketone **3e** to aromatic pinacol **4e**.

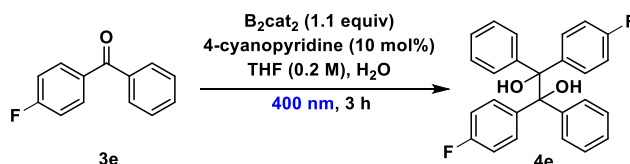

According to GP1, the reaction is carried out with **3e** (80.4 mg, 0.40 mmol), B<sub>2</sub>cat<sub>2</sub> (104 mg, 0.44 mmol) and 4-cyanopyridine (4 mg, 10 mol%) in THF (2 mL, 0.2 M) and 0.1 mL H<sub>2</sub>O are added into the tube. Purification by flash column chromatography (hexane: ethyl acetate = 12:1) give the desired product **4e** (70 mg, 85% yield) as a white powder.

<sup>1</sup>H NMR (400 MHz, CDCl<sub>3</sub>) δ 7.43-7.39 (m, 2.12H), 7.31-7.28 (m, 4.06H), 7.24-7.19 (m, 6H), 7.17-7.15 (m, 2.02H), 6.90-6.85 (m, 3.95 H), 2.99-2.97 (d, 1.84H).

(6) Conversion of aromatic ketone **3f** to aromatic pinacol **4f**.

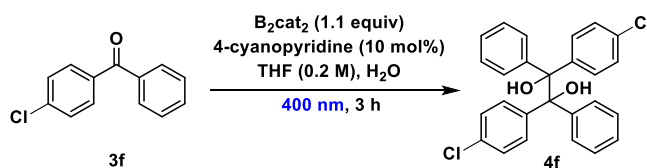

According to GP1, the reaction is carried out with **3f** (87 mg, 0.40 mmol), B<sub>2</sub>cat<sub>2</sub> (104 mg, 0.4 mmol) and 4-cyanopyridine (4 mg, 10 mol%) in THF (2 mL, 0.2 M) and 0.1 mL H<sub>2</sub>O are added into the tube. Purification by flash column chromatography (hexane: ethyl acetate = 20:1) give the desired product **4f** (70 mg, 79% yield) as a white powder.

<sup>1</sup>H NMR (400 MHz, CDCl<sub>3</sub>) δ 7.43-7.41 (d, 1.92H), 7.27-7.20 (dd, 10H), 7.17-7.14 (m, 4.1H) 7.10-7.08 (d, 1.8 H) 2.98-2.96 (d, 2H).

<sup>13</sup>C NMR (125 MHz, CDCl<sub>3</sub>) δ 143.50, 143.19, 142.70, 133.01, 132.82, 130.13, 130.09, 128.34, 128.27, 127.62, 127.56, 127.51, 127.41, 127.37, 82.74, 82.70.

(7) Conversion of aromatic ketone **3g** to aromatic pinacol **4g**.

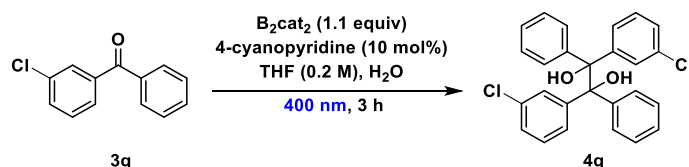

According to GP1, the reaction is carried out with **3g** (87 mg, 0.40 mmol), B<sub>2</sub>cat<sub>2</sub> (94 mg, 0.4 mmol) and 4-cyanopyridine (4 mg, 10 mol%) in THF (2 mL, 0.2 M) and 0.1 mL H<sub>2</sub>O is dropped into the tube. Purification by flash column chromatography (hexane: ethyl acetate = 20:1) give the desired product **4g** (72 mg, 80% yield) as a white powder.

<sup>1</sup>H NMR (400 MHz, CDCl<sub>3</sub>) δ 7.50-7.49 (t, 1.04H), 7.44-7.42 (d, 1.12H), 7.35 (t, 0.9H), 7.31-7.28 (m, 2.94H), 7.24-7.23 (m, 4.90H), 7.21-7.20 (m, 2.06H), 7.17-7.13 (m, 5.16H), 3.02-3.00 (d, 2H).



$^{13}\text{C}$  NMR (125 MHz,  $\text{CDCl}_3$ )  $\delta$  146.20, 146.15, 143.14, 142.93, 133.54, 133.49, 128.90, 128.85, 128.48, 128.43, 128.31, 127.67, 127.64, 127.52, 127.27, 127.17, 126.88, 126.83, 82.83, 82.78

(8) Conversion of aromatic ketone **3h** to aromatic pinacol **4h**.

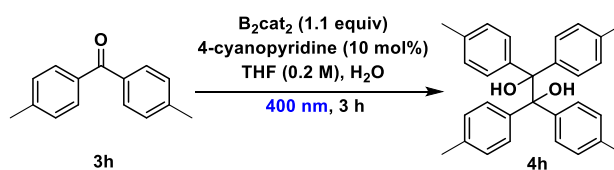

According to GP1, the reaction is carried out with **3h** (84 mg, 0.40 mmol),  $\text{B}_2\text{cat}_2$  (104 mg, 0.4 mmol) and 4-cyanopyridine (4 mg, 10 mol%) in THF (2 mL, 0.2 M) and 0.1 mL  $\text{H}_2\text{O}$  are added into the tube. Purification by flash column chromatography (hexane: ethyl acetate = 20:1) give the desired product **4h** (68 mg, 80% yield) as a white powder.

$^1\text{H}$  NMR (400 MHz,  $\text{CDCl}_3$ )  $\delta$  7.18-7.16 (d, 8H), 7.00-6.98 (d, 7.98H), 2.98 (s, 1.75H), 2.30 (11.96 H).

$^{13}\text{C}$  NMR (125 MHz,  $\text{CDCl}_3$ )  $\delta$  141.53, 136.30, 128.48, 127.96, 82.84, 20.97.

(9) Conversion of aromatic ketone **3i** to aromatic pinacol **4i**

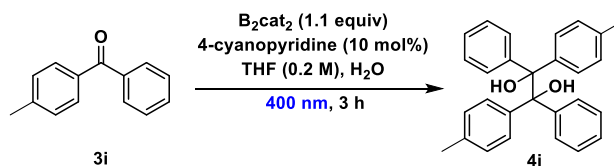

According to GP1, the reaction is carried out with **3i** (79 mg, 0.40 mmol),  $\text{B}_2\text{cat}_2$  (104 mg, 0.4 mmol) and 4-cyanopyridine (4 mg, 10 mol%) in THF (2 mL, 0.2 M) and 0.1 mL  $\text{H}_2\text{O}$  are added into the tube. Purification by flash column chromatography (hexane: ethyl acetate = 20:1) give the desired product **4i** (72 mg, 92% yield) as a white powder.

$^1\text{H}$  NMR (400 MHz,  $\text{CDCl}_3$ )  $\delta$  7.45-7.40 (m, 4H), 7.26-7.22 (m, 10H), 7.08-7.04 (t, 4H), 3.12 (s, 1.81H), 2.37-2.36 (d, 6H).

$^{13}\text{C}$  NMR (125 MHz,  $\text{CDCl}_3$ )  $\delta$  144.59, 144.57, 141.39, 141.34, 136.62, 136.53, 128.73, 128.68, 128.64, 128.59, 128.13, 128.10, 127.30, 127.28, 126.88, 126.81, 83.04, 21.16.

(10) Conversion of aromatic ketone **3j** to aromatic pinacol **4j**.

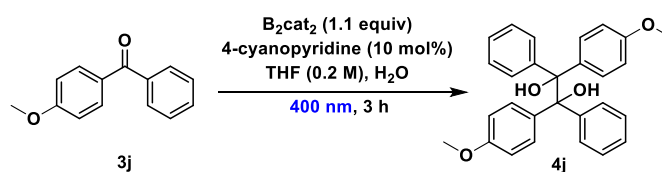

According to GP1, the reaction is carried out with **3j** (85 mg, 0.40 mmol),  $\text{B}_2\text{cat}_2$  (104 mg, 0.4 mmol) and 4-cyanopyridine (4 mg, 10 mol%) in THF (2 mL, 0.2 M) and 0.1 mL  $\text{H}_2\text{O}$  are added into the tube. Purification by flash column chromatography (hexane: ethyl acetate = 20:1) give the desired product **4j** (65 mg, 75% yield) as a white powder.

$^1\text{H}$  NMR (400 MHz,  $\text{CDCl}_3$ )  $\delta$  7.35-7.30 (m, 4H), 7.22-7.18 (m, 10H), 6.76-6.70 (t, 4H), 3.78-3.77 (d, 6.10H), 2.99 (s, 1.87H).

$^{13}\text{C}$  NMR (125 MHz,  $\text{CDCl}_3$ )  $\delta$  158.38, 158.32, 144.54, 136.58, 129.92, 129.85, 128.61, 128.54, 127.25, 126.83, 126.77, 112.57, 82.59, 55.13, 55.12.

(11) Conversion of aromatic ketone **3k** to aromatic pinacol **4k**.

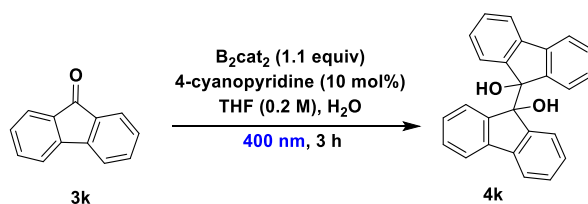

According to GP1, the reaction is carried out with **3k** (72 mg, 0.40 mmol), B<sub>2</sub>cat<sub>2</sub> (104 mg, 0.4 mmol) and 4-cyanopyridine (4 mg, 10 mol%) in THF (2 mL, 0.2 M) and 0.1 mL H<sub>2</sub>O are added into the tube. Purification by flash column chromatography (hexane: ethyl acetate = 20:1) give the desired product **4k** (56 mg, 77% yield) as a white powder.

<sup>1</sup>H NMR (400 MHz, CDCl<sub>3</sub>) δ 7.39-7.07 (m, 15.93H), 3.22 (s, 2.0H).

<sup>13</sup>C NMR (125 MHz, CDCl<sub>3</sub>) δ 145.19, 140.63, 129.15, 127.09, 125.21, 119.27, 86.48.

(12) Conversion of aromatic ketone **3l** to aromatic pinacol **4l**.

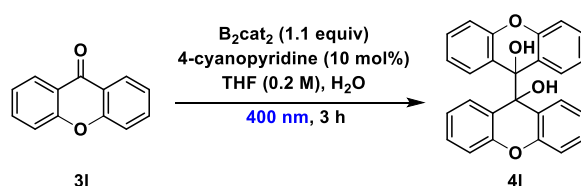

According to GP1, the reaction is carried out with **3l** (79 mg, 0.40 mmol), B<sub>2</sub>cat<sub>2</sub> (104 mg, 0.4 mmol) and 4-cyanopyridine (4 mg, 10 mol%) in THF (2 mL, 0.2 M) and 0.1 mL H<sub>2</sub>O are added into the tube. Purification by flash column chromatography (hexane: ethyl acetate = 20:1) give the desired product **4l** (64 mg, 81% yield) as a white powder.

<sup>1</sup>H NMR (400 MHz, CDCl<sub>3</sub>) δ 7.30-7.26 (m, 4.03H), 7.12-7.10 (d, 4.02H), 7.00-6.96 (t, 4.10H), 6.85-6.83 (d, 4.0H), 3.33 (s, 1.81H).

<sup>13</sup>C NMR (125 MHz, CDCl<sub>3</sub>) δ 151.90, 129.23, 127.40, 122.71, 122.10, 115.22, 75.43.

### Optimization of the reaction condition.

**Table S1.** Optimization of the reaction condition of reductive hydrogenation of nitrobenzene. <sup>[a]</sup>

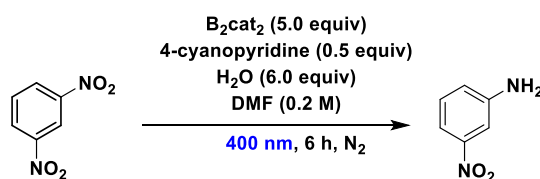

| Entry            | Variation from standard condition                                  | yield (%) <sup>[b]</sup> |
|------------------|--------------------------------------------------------------------|--------------------------|
| 1                | none                                                               | 80                       |
| 2                | B(OH) <sub>3</sub>                                                 | N.D.                     |
| 3                | B <sub>2</sub> pin <sub>2</sub>                                    | Trace                    |
| 4                | 1.0 eq B <sub>2</sub> cat <sub>2</sub> and 0.1 eq 4-cyanopyridine  | 20                       |
| 5                | 2.5 eq B <sub>2</sub> cat <sub>2</sub> and 0.25 eq 4-cyanopyridine | 60                       |
| 6                | 1.0 eq B <sub>2</sub> cat <sub>2</sub> and 1.0 eq 4-cyanopyridine  | Trace                    |
| 7 <sup>[c]</sup> | No light                                                           | 50                       |
| 8                | no B <sub>2</sub> cat <sub>2</sub>                                 | N.D.                     |
| 9                | no 4-cyanopyridine                                                 | 20                       |
| 10               | no H <sub>2</sub> O                                                | 65                       |

|    |                         |      |
|----|-------------------------|------|
| 11 | blue LED (450 nm)       | N.D. |
| 12 | UV (365 nm)             | 70   |
| 13 | MeOH                    | 65   |
| 14 | DCM                     | 45   |
| 15 | ACN                     | 70   |
| 16 | THF                     | 95   |
| 17 | THF, 30 min irradiation | 94   |

[a] Reaction conditions: **1** (0.2 mmol, 1 equiv), B<sub>2</sub>cat<sub>2</sub> (1 mmol, 5 equiv), 4-cyanopyridine (0.5 equiv), DMF (1 mL), H<sub>2</sub>O (0.1 mL), 6 h, r. t., blue LEDs (400 nm). [b] The yield was determined by HPLC. [c] no light, 80 °C.

### Generation of arylamine

(1) Conversion of nitroaromatic compound **5a** to arylamine **6a**.

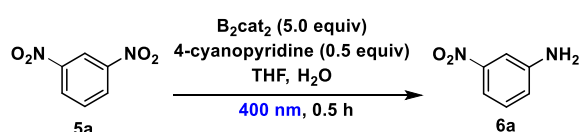

According to GP2, the reaction is carried out with **5a** (33.6 mg, 0.2 mmol), B<sub>2</sub>cat<sub>2</sub> (237.4 mg, 1 mmol) and 4-cyanopyridine (10.4 mg, 0.1 mmol) in THF (3 mL), and 0.1 mL H<sub>2</sub>O are added into the tube. Purification by flash column chromatography (hexane: ethyl acetate = 12:1) give the desired product **6a** (26.2 mg, 95% yield) as a yellow powder.

<sup>1</sup>H NMR (400 MHz, CDCl<sub>3</sub>) δ 7.60-7.57 (dd, 0.91H), 7.51-7.49 (t, 0.90H), 7.31-7.26 (t, 0.94H), 6.97-6.95 (dd, 0.94H), 4.04 (s, 1.92H).

<sup>13</sup>C NMR (125 MHz, CDCl<sub>3</sub>) δ 149.26, 147.47, 129.92, 120.63 113.13, 109.02.

(2) Conversion of nitroaromatic compound **5b** to arylamine **6b**.

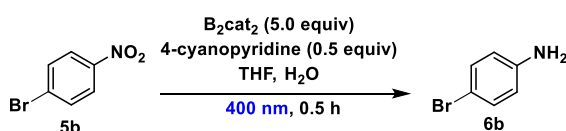

According to GP2, the reaction is carried out with **5b** (40.4 mg, 0.2 mmol), B<sub>2</sub>cat<sub>2</sub> (237.4 mg, 1 mmol) and 4-cyanopyridine (10.4 mg, 0.1 mmol) in THF (3 mL), and 0.1 mL H<sub>2</sub>O are added into the tube. Purification by flash column chromatography (hexane: ethyl acetate = 12:1) give the desired product **6b** (33.1 mg, 96% yield) as a white powder.

<sup>1</sup>H NMR (400 MHz, CDCl<sub>3</sub>) δ 7.27-7.23 (m, 2.02H), 6.60-6.59 (m, 2.04H), 3.68 (s, 1.89H).

<sup>13</sup>C NMR (125 MHz, CDCl<sub>3</sub>) δ 145.41, 132.02, 116.0, 110.22.

Conversion of nitroaromatic compound **5c** to arylamine **6c**.

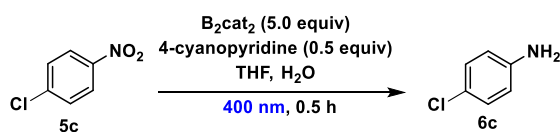

According to GP2, the reaction is carried out with **5c** (31.4 mg, 0.2 mmol), B<sub>2</sub>cat<sub>2</sub> (237.4 mg, 1 mmol) and 4-cyanopyridine (10.4 mg, 0.1 mmol) in THF (3 mL), and 0.1 mL H<sub>2</sub>O are added into the tube. Purification by flash column chromatography (hexane: ethyl acetate = 12:1) give the

desired product **6c** (24.5 mg, 96% yield) as a white powder.

$^1\text{H NMR}$  (400 MHz,  $\text{CDCl}_3$ )  $\delta$  7.13-7.10 (d, 1.98H), 6.64-6.61 (d, 2.01H), 3.67 (s, 2H).

$^{13}\text{C NMR}$  (125 MHz,  $\text{CDCl}_3$ )  $\delta$  144.94, 129.12, 123.18, 116.22.

Conversion of nitroaromatic compound **5d** to arylamine **6d**.

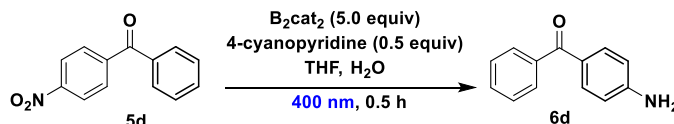

According to GP2, the reaction is carried out with **5d** (45.4 mg, 0.2 mmol),  $\text{B}_2\text{cat}_2$  (237.4 mg, 1 mmol) and 4-cyanopyridine (10.4 mg, 0.1 mmol) in THF (3 mL), and 0.1 mL  $\text{H}_2\text{O}$  are added into the tube. Purification by flash column chromatography (hexane: ethyl acetate = 12:1) give the desired product **6d** (35.5 mg, 90% yield) as a white powder.

$^1\text{H NMR}$  (400 MHz,  $\text{CDCl}_3$ )  $\delta$  7.75-7.73 (d, 3.92H), 7.56-7.53 (t, 1.04H), 7.49-7.45 (t, 1.97H), 6.70-6.68 (d, 2H), 4.21 (s, 1.70H).

$^{13}\text{C NMR}$  (125 MHz,  $\text{CDCl}_3$ )  $\delta$  195.44, 151.05, 138.86, 132.98, 131.45, 129.54, 128.09, 127.34, 113.65

Conversion of nitroaromatic compound **5e** to arylamine **6e**.

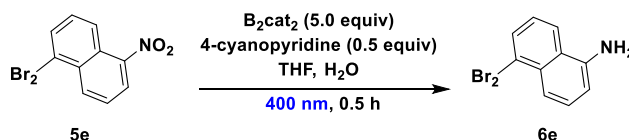

According to GP2, the reaction is carried out with **5e** (50.4 mg, 0.2 mmol),  $\text{B}_2\text{cat}_2$  (237.4 mg, 1 mmol) and 4-cyanopyridine (10.4 mg, 0.1 mmol) in THF (3 mL), and 0.1 mL  $\text{H}_2\text{O}$  are added into the tube. Purification by flash column chromatography (hexane: ethyl acetate = 12:1) give the desired product **6e** (36.4 mg, 82% yield) as a dark brown powder.

$^1\text{H NMR}$  (400 MHz,  $\text{CDCl}_3$ )  $\delta$  7.83-7.78 (q, 1.91H), 7.74-7.72 (d, 0.91H), 7.43-7.39 (t, 0.96H), 7.31-7.28 (t, 1.29H), 6.87-6.85 (d, 0.95H), 4.20 (s, 2H).

$^{13}\text{C NMR}$  (125 MHz,  $\text{CDCl}_3$ )  $\delta$  142.42, 132.94, 130.13, 127.75, 124.89, 124.77, 123.67, 120.74, 118.18, 110.70.

Conversion of nitroaromatic compound **5f** to arylamine **6f**.

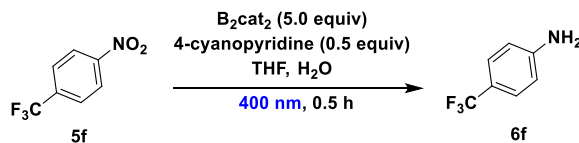

According to GP2, the reaction is carried out with **5f** (38.2 mg, 0.2 mmol),  $\text{B}_2\text{cat}_2$  (237.4 mg, 1 mmol) and 4-cyanopyridine (10.4 mg, 0.1 mmol) in THF (3 mL), and 0.1 mL  $\text{H}_2\text{O}$  are added into the tube. Purification by flash column chromatography (hexane: ethyl acetate = 12:1) give the desired product **6f** (30.6 mg, 95% yield) as a pure yellow oil.

$^1\text{H NMR}$  (400 MHz,  $\text{CDCl}_3$ )  $\delta$  7.07-7.05 (d, 1.90H), 6.68-6.66 (d, 1.92H), 3.83 (s, 2H).

$^{13}\text{C NMR}$  (125 MHz,  $\text{CDCl}_3$ )  $\delta$  146.45, 141.61, 122.19, 120.38, 117.19, 115.49.

Conversion of nitroaromatic compound **5g** to arylamine **6g**.

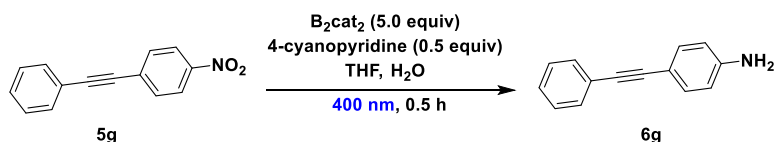

According to GP2, the reaction is carried out with **5g** (44.6 mg, 0.2 mmol),  $\text{B}_2\text{cat}_2$  (237.4 mg, 1 mmol) and 4-cyanopyridine (10.4 mg, 0.1 mmol) in THF (3 mL), and 0.1 mL  $\text{H}_2\text{O}$  are added into the tube. Purification by flash column chromatography (hexane: ethyl acetate = 12:1) give the desired product **6g** (36.7 mg, 94% yield) as a white powder.

$^1\text{H}$  NMR (400 MHz,  $\text{CDCl}_3$ )  $\delta$  7.55-7.52 (dd, 1.98H), 7.39-7.34 (m, 5H), 6.67-6.65 (d, 2.02H), 3.84 (s, 1.97H).

$^{13}\text{C}$  NMR (125 MHz,  $\text{CDCl}_3$ )  $\delta$  146.69, 132.99, 131.38, 128.31, 127.70, 123.92, 114.778, 112.60, 90.17, 87.36.

Conversion of nitroaromatic compound **5h** to arylamine **6h**.

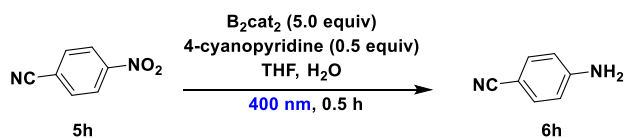

According to GP2, the reaction is carried out with **5h** (44.6 mg, 0.2 mmol),  $\text{B}_2\text{cat}_2$  (237.4 mg, 1 mmol) and 4-cyanopyridine (10.4 mg, 0.1 mmol) in THF (3 mL), and 0.1 mL  $\text{H}_2\text{O}$  are added into the tube. Purification by flash column chromatography (hexane: ethyl acetate = 12:1) give the desired product **6h** (36.7 mg, 94% yield) as a white powder.

$^1\text{H}$  NMR (400 MHz,  $\text{CDCl}_3$ )  $\delta$  7.43-7.41 (d, 2H), 6.66-6.64 (d, 2.05H), 4.16 (s, 2H).

$^{13}\text{C}$  NMR (125 MHz,  $\text{CDCl}_3$ )  $\delta$  150.37, 132.83, 120.11, 114.45, 100.27.

Conversion of nitroaromatic compound **5i** to arylamine **6i**.

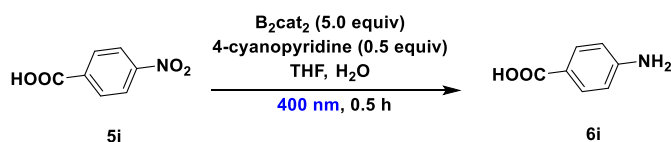

According to GP2, the reaction is carried out with **5i** (33.4 mg, 0.2 mmol),  $\text{B}_2\text{cat}_2$  (237.4 mg, 1 mmol) and 4-cyanopyridine (10.4 mg, 0.1 mmol) in THF (3 mL), and 0.1 mL  $\text{H}_2\text{O}$  are added into the tube. Purification by flash column chromatography (hexane: ethyl acetate = 12:1) give the desired product **6i** (26.3 mg, 96% yield) as a white powder.

$^1\text{H}$  NMR (400 MHz,  $\text{DMSO-d}_6$ )  $\delta$  11.97 (s, 0.92H), 7.62-7.59 (d, 1.98H), 6.54-6.52 (d, 2H), 5.88 (s, 1.94H).

$^{13}\text{C}$  NMR (125 MHz,  $\text{DMSO-d}_6$ )  $\delta$  167.94, 153.59, 131.66, 117.39, 113.02.

Conversion of nitroaromatic compound **5j** to arylamine **6j**.

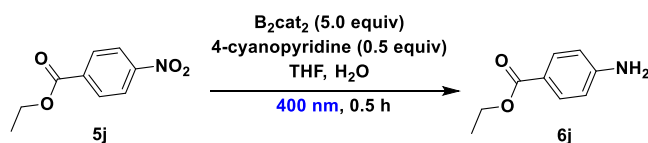

According to GP2, the reaction is carried out with **5j** (39.0 mg, 0.2 mmol),  $\text{B}_2\text{cat}_2$  (237.4 mg, 1 mmol) and 4-cyanopyridine (10.4 mg, 0.1 mmol) in THF (3 mL), and 0.1 mL  $\text{H}_2\text{O}$  are added into

the tube. Purification by flash column chromatography (hexane: ethyl acetate = 12:1) give the desired product **6j** (30.4 mg, 92% yield) as a white powder.

$^1\text{H NMR}$  (400 MHz,  $\text{CDCl}_3$ )  $\delta$  7.88-7.86 (d, 1.82H), 6.66-6.64 (d, 1.89H), 4.35-4.30 (q, 2H), 4.09 (s, 1.89H), 1.39-1.36 (t, 3H).

$^{13}\text{C NMR}$  (125 MHz,  $\text{CDCl}_3$ )  $\delta$  166.73, 150.75, 131.55, 120.10, 113.78, 60.31, 14.42.

Conversion of nitroaromatic compound **5k** to arylamine **6k**.

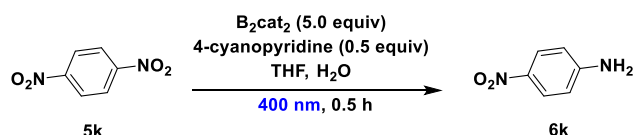

According to GP2, the reaction is carried out with **5k** (33.6 mg, 0.2 mmol),  $\text{B}_2\text{cat}_2$  (237.4 mg, 1 mmol) and 4-cyanopyridine (10.4 mg, 0.1 mmol) in THF (3 mL), and 0.1 mL  $\text{H}_2\text{O}$  are added into the tube. Purification by flash column chromatography (hexane: ethyl acetate = 12:1) give the desired product **6k** (27.0 mg, 96% yield) as a yellow powder.

$^1\text{H NMR}$  (400 MHz,  $\text{DMSO-d}_6$ )  $\delta$  7.93-7.91 (d, 1.99H), 6.72 (s, 2H), 6.58-6.56 (d, 2.11H).

$^{13}\text{C NMR}$  (125 MHz,  $\text{DMSO-d}_6$ )  $\delta$  156.15, 136.10, 126.83, 112.82.

Conversion of nitroaromatic compound **5l** to arylamine **6l**.

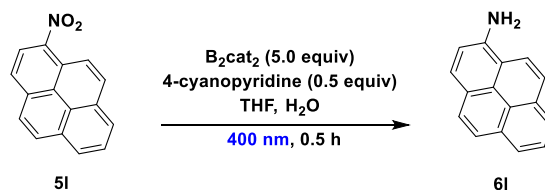

According to GP2, the reaction is carried out with **5l** (49.4 mg, 0.2 mmol),  $\text{B}_2\text{cat}_2$  (237.4 mg, 1 mmol) and 4-cyanopyridine (10.4 mg, 0.1 mmol) in THF (3 mL), and 0.1 mL  $\text{H}_2\text{O}$  are added into the tube. Purification by flash column chromatography (hexane: ethyl acetate = 30:1) give the desired product **6l** (35.6 mg, 82% yield) as a yellow powder.

$^1\text{H NMR}$  (400 MHz,  $\text{CDCl}_3$ )  $\delta$  8.10-8.06 (t, 2.02H), 8.02-8.00 (d, 1.99H), 7.95-7.93 (m, 2.96H), 7.86-7.84 (d, 0.99H), 7.40-7.38 (d, 0.98H), 4.49 (s, 2H).

$^{13}\text{C NMR}$  (125 MHz,  $\text{CDCl}_3$ )  $\delta$  140.91, 132.22, 131.67, 127.63, 126.04, 125.99, 125.51, 124.30, 124.12, 123.75, 123.55, 120.16, 116.88, 113.97.

Conversion of nitroaromatic compound **5m** to arylamine **6m**.

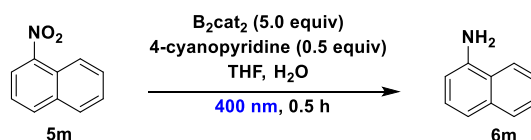

According to GP2, the reaction is carried out with **5m** (34.6 mg, 0.2 mmol),  $\text{B}_2\text{cat}_2$  (237.4 mg, 1 mmol) and 4-cyanopyridine (10.4 mg, 0.1 mmol) in THF (3 mL), and 0.1 mL  $\text{H}_2\text{O}$  are added into the tube. Purification by flash column chromatography (hexane: ethyl acetate = 20:1) give the desired product **6m** (25.7 mg, 89% yield) as a white powder.

$^1\text{H NMR}$  (400 MHz,  $\text{CDCl}_3$ )  $\delta$  7.87-7.83 (m, 1.99H), 7.52-7.46 (m, 1.96H), 7.35-7.31 (m, 1.97H), 6.83-6.80 (dd, 0.96H), 4.16 (s, 2H).

$^{13}\text{C NMR}$  (125 MHz,  $\text{CDCl}_3$ )  $\delta$  142.08, 134.42, 128.58, 126.36, 125.8, 124.88, 123.68, 120.81,

119.01, 109.72

Conversion of nitroaromatic compound **5n** to arylamine **6n**.

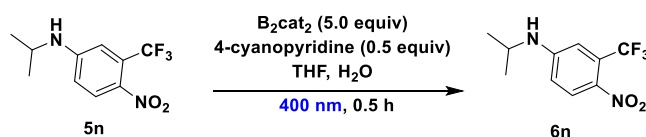

According to GP2, the reaction is carried out with **5n** (49.6 mg, 0.2 mmol),  $B_2cat_2$  (237.4 mg, 1 mmol) and 4-cyanopyridine (10.4 mg, 0.1 mmol) in THF (3 mL), and 0.1 mL  $H_2O$  are added into the tube. Purification by flash column chromatography (hexane: ethyl acetate = 12:1) give the desired product **6n** (32.7 mg, 75% yield) as a pure yellow powder.

$^1H$  NMR (400 MHz,  $CDCl_3$ )  $\delta$  7.57-7.56 (d, 0.98H), 7.49-7.46 (dd, 1.01H), 7.26 (s, 0.94H), 6.72-6.89 (d, 1H), 4.09 (s, 1.93H), 2.51-2.47 (m, 1H), 1.25-1.24 (d, 6H).

$^{13}C$  NMR (125 MHz,  $CDCl_3$ )  $\delta$  175.40, 141.23, 128.61, 125.92, 123.20, 119.02, 118.97, 117.68, 36.34, 19.57.

### Optimization of the reaction conditions for generation of sulfides.

**Table S2.** Optimization of the reaction condition of reductive hydrogenation of sulfoxide. <sup>[a]</sup>

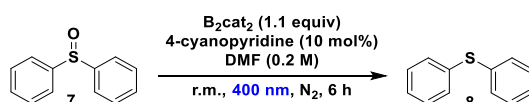

| Entry | Variation from standard condition | yield (%) <sup>[b]</sup> |
|-------|-----------------------------------|--------------------------|
| 1     | None                              | 90                       |
| 2     | no 4-cyanopyridine                | 70                       |
| 3     | no 4-cyanopyridine, 12h           | 88                       |
| 4     | DCM (0.2 M)                       | 90                       |
| 5     | THF (0.2 M)                       | 80                       |
| 6     | MeOH (0.2 M)                      | 82                       |

<sup>[a]</sup> Reaction conditions: **7** (0.2 mmol, 1 equiv),  $B_2cat_2$  (0.22 mmol, 1.2 equiv), 4-cyanopyridine (0.11 mmol), DMF (1 mL), 6 h, r. t., blue LEDs (400 nm). <sup>[b]</sup> The yield was determined by HPLC. <sup>[c]</sup>

Conversion of sulfoxide **7a** to sulfide **8a**.

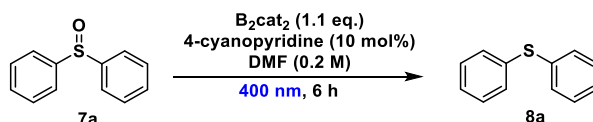

According to GP3, the reaction is carried out with **7a** (80.5 mg, 0.4 mmol),  $B_2cat_2$  (104 mg, 4.4 mmol) and 4-cyanopyridine (4 mg, 10 mol%) in DMF (2 mL). Purification by flash column chromatography (hexane: ethyl acetate = 100:1) give the desired product **8a** (66.9 mg, 90% yield) as colorless oil.

$^1H$  NMR (400 MHz,  $CDCl_3$ )  $\delta$  7.38-7.25 (m, 10H).

$^{13}C$  NMR (125 MHz,  $CDCl_3$ )  $\delta$  135.79, 131.05, 129.20, 127.05.

Conversion of sulfoxide **7b** to sulfide **8b**.

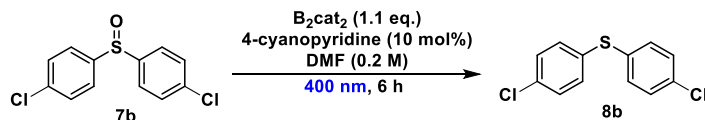

According to GP3, the reaction is carried out with **7a** (108.4 mg, 0.4 mmol), B<sub>2</sub>cat<sub>2</sub> (104 mg, 4.4 mmol) and 4-cyanopyridine (4 mg, 10 mol%) in DMF (2 mL). Purification by flash column chromatography (hexane: ethyl acetate = 100:1) give the desired product **8a** (81.6 mg, 80% yield) as white solid.

<sup>1</sup>H NMR (400 MHz, CDCl<sub>3</sub>) δ 7.31-7.25 (m, 8H).

<sup>13</sup>C NMR (125 MHz, CDCl<sub>3</sub>) δ 133.94, 133.48, 132.31, 129.50.

Conversion of sulfoxide **7c** to sulfide **8c**.

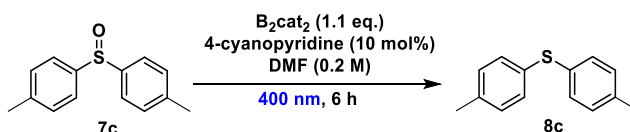

According to GP3, the reaction is carried out with **7a** (92.2 mg, 0.4 mmol), B<sub>2</sub>cat<sub>2</sub> (104 mg, 4.4 mmol) and 4-cyanopyridine (4 mg, 10 mol%) in DMF (2 mL). Purification by flash column chromatography (hexane: ethyl acetate = 100:1) give the desired product **8c** (76.2 mg, 89% yield) as colorless oil.

<sup>1</sup>H NMR (400 MHz, CDCl<sub>3</sub>) δ 7.27-7.25 (d, 4.07H), 7.14-7.12 (d, 3.81H), 2.35 (s, 6H).

<sup>13</sup>C NMR (125 MHz, CDCl<sub>3</sub>) δ 136.91, 132.67, 131.07, 129.92, 21.08.

## 5. Computational Results

### Computational Details

All the calculations were carried out via density functional theory (DFT) calculation using Gaussian 16<sup>1</sup> with the M062x<sup>2</sup> functional. Geometric structures of all species in this work were optimized in gas phase. In addition, free energy corrections were considered at a concentration of 1 M and a temperature of 298.15 K. Frequency calculation were performed to determine all the stationary points (no imaginary frequency) and transition state structures (only one imaginary frequency). The 6-311G(d)<sup>3</sup> basis set was used for all atoms. In addition, the intrinsic reaction coordinate (IRC) calculation<sup>4</sup> were applied to confirm the connection of each transition state to its corresponding appropriate intermediates, reactants, or products. Base on the gas phase optimized geometries, solvent effects were computed by using the SMD<sup>5</sup> model at the same level of theory while 6-311++G(d,p) basis set for all atoms. Tetrahydrofuran ( $\epsilon = 7.52$ ) was used as the solvent, and Bondi atomic radii<sup>6</sup> was used for the SMD calculation. All 3D molecular structures were drawn by using the CYLview (Version) program<sup>7</sup>.

**Table S2.** The gas phase relative electronic energies ( $\Delta E_{\text{gas}}$ ), gas phase relative free energies ( $\Delta G_{\text{gas}}$ ) and solvation corrected relative electronic energies ( $\Delta E_{\text{sol}}$ ) in kcal/mol calculated for species involved in **Figure S4**.

| Species  | $\Delta E_{\text{gas}}$ | $\Delta G_{\text{gas}}$ | $\Delta E_{\text{sol}}$ |
|----------|-------------------------|-------------------------|-------------------------|
| <b>5</b> | 0.0                     | 0.0                     | 0.0                     |



|      |        |        |        |
|------|--------|--------|--------|
| TS1  | -12.8  | 0.4    | -6.3   |
| INT1 | -16.5  | -18.0  | -12.6  |
| INT2 | -51.5  | -33.3  | -49.6  |
| TS2  | -47.4  | -30.3  | -42.2  |
| INT3 | -34.6  | -32.4  | -32.4  |
| TS3  | -11.0  | -10.3  | -10.9  |
| INT4 | -47.3  | -60.4  | -48.3  |
| TS4A | -36.2  | -35.1  | -36.1  |
| INT5 | -130.7 | -128.2 | -127.2 |
| INT6 | -151.4 | -149.5 | -140.6 |
| INT7 | -125.5 | -123.4 | -121.6 |
| TS5  | -144.2 | -128.4 | -134.6 |
| 6    | -262.6 | -260.5 | -249.1 |

**Table S3.** The gas phase relative electronic energies ( $\Delta E_{\text{gas}}$ ), gas phase relative free energies ( $\Delta G_{\text{gas}}$ ) and solvation corrected relative electronic energies ( $\Delta E_{\text{sol}}$ ) in kcal/mol calculated for species involved in **Figure 3**.

| Species   | $\Delta E_{\text{gas}}$ | $\Delta G_{\text{gas}}$ | $\Delta E_{\text{sol}}$ |
|-----------|-------------------------|-------------------------|-------------------------|
| 5         | 0.0                     | 0.0                     | 0.0                     |
| TS1       | -12.8                   | 0.4                     | -6.3                    |
| INT1      | -16.5                   | -18.0                   | -12.6                   |
| INT2      | -51.5                   | -33.3                   | -49.6                   |
| TS2       | -47.4                   | -30.3                   | -42.2                   |
| INT3      | -34.6                   | -32.4                   | -32.4                   |
| TS3       | -11.0                   | -10.3                   | -10.9                   |
| INT4      | -47.3                   | -60.4                   | -48.3                   |
| TS4B      | -57.6                   | -56.9                   | -55.5                   |
| INT4-B    | -64.3                   | -77.0                   | -64.7                   |
| TS4-B-oss | -80.3                   | -77.3                   | -75.9                   |
| TS4-B-ts  | -81.2                   | -78.2                   | -76.5                   |
| INT5      | -105.3                  | -116.2                  | -103.5                  |
| INT6      | -126.0                  | -137.6                  | -116.9                  |
| INT7      | -100.1                  | -111.5                  | -97.9                   |
| TS5       | -118.8                  | -116.5                  | -111.0                  |
| 6         | -237.2                  | -248.6                  | -225.4                  |

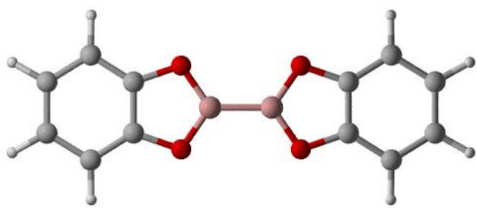

1

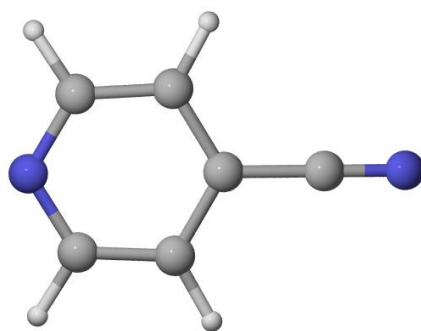

2

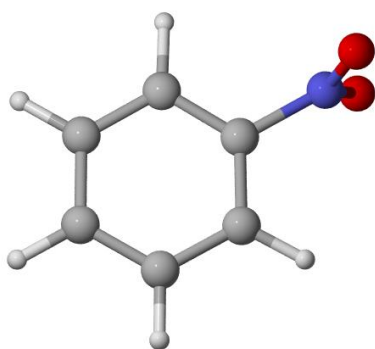

5

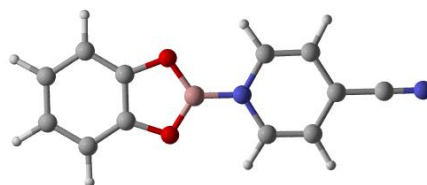

[B]

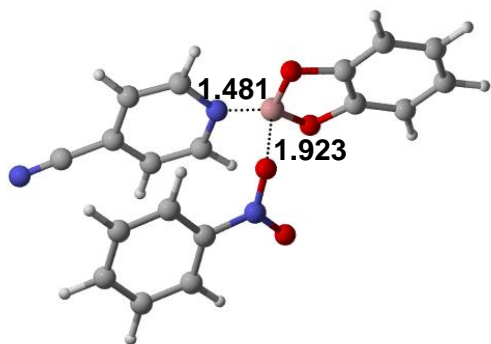

TS1

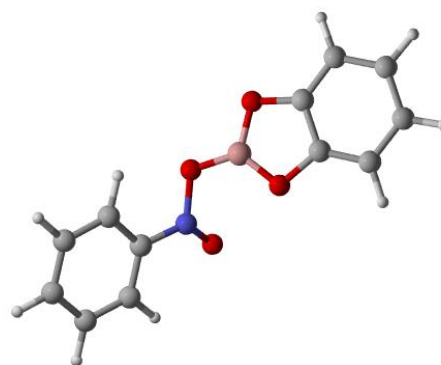

INT1

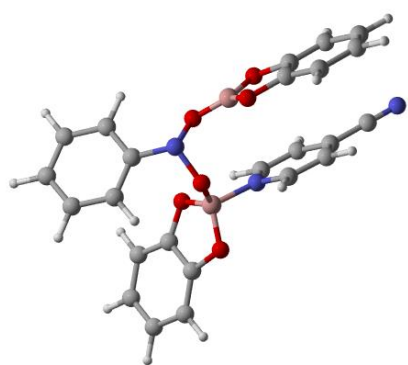

INT2

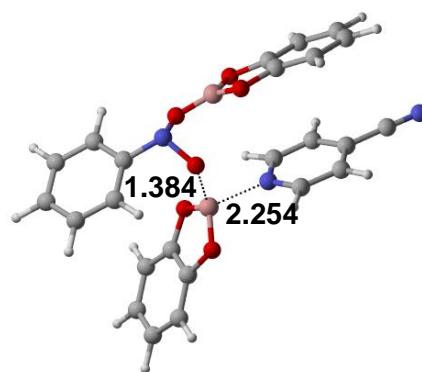

TS2

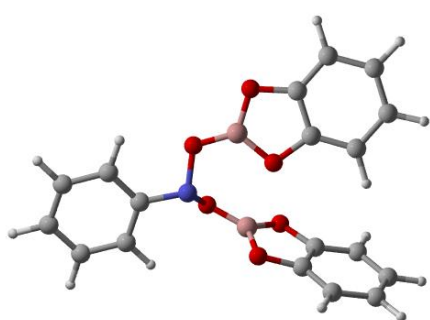

INT3

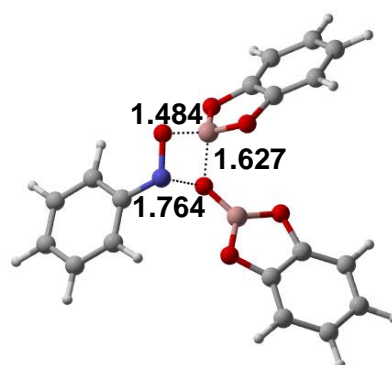

TS3

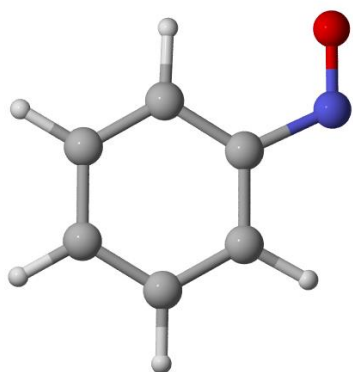

INT4

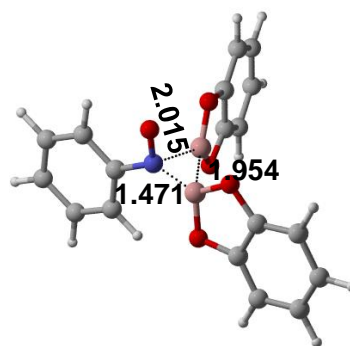

TS4A

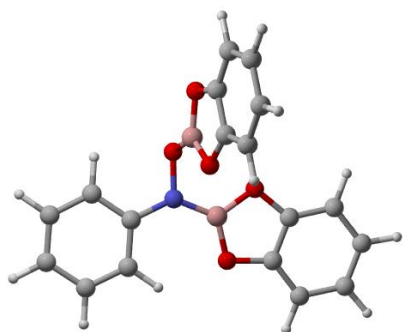

**INT5**

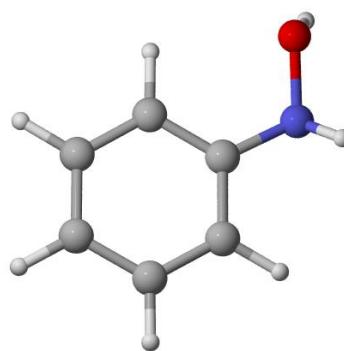

**INT6**

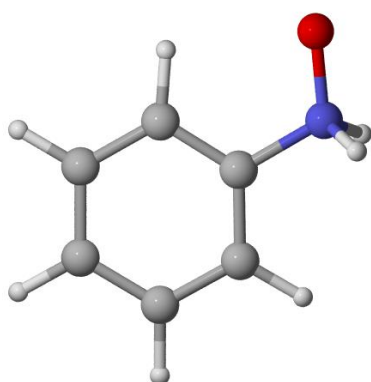

**INT7**

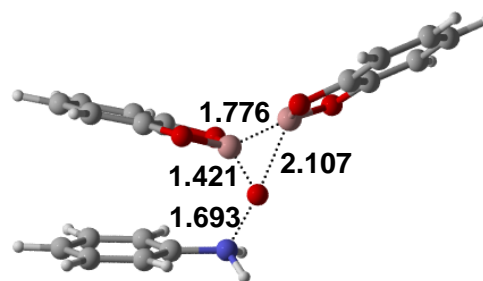

**TS5**

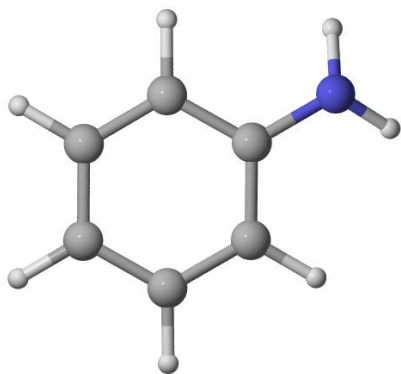

**6**

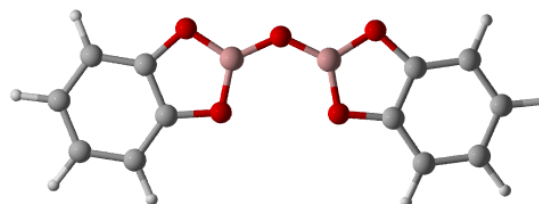

**Bcat-O-Bcat**

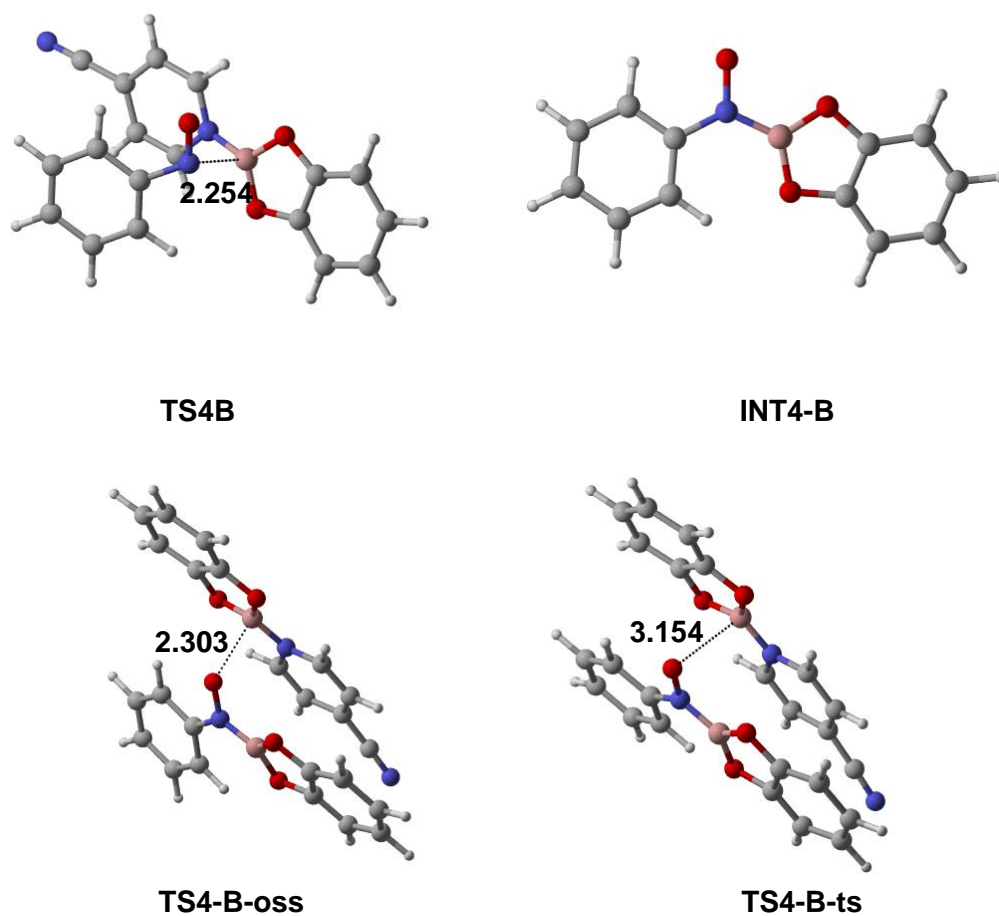

**Figure S6.** Optimized structures of all species involved in Figure S4 and Figure 3 with M062x/6-311G(d). 3D geometric structures of relative transition states are given in Angstrom ( $\text{\AA}$ ).

**Table S4.** The gas phase relative electronic energies ( $\Delta E_{\text{gas}}$ ), gas phase relative free energies ( $\Delta G_{\text{gas}}$ ) and solvation corrected relative electronic energies ( $\Delta E_{\text{sol}}$ ) in kcal/mol calculated for species involved in **Figure S5**.

| Species      | $\Delta E_{\text{gas}}$ | $\Delta G_{\text{gas}}$ | $\Delta E_{\text{sol}}$ |
|--------------|-------------------------|-------------------------|-------------------------|
| <b>1 + 2</b> | 0                       | 0                       | 0                       |
| <b>TSA</b>   | -19.1                   | 12.0                    | -12.0                   |
| <b>[B]·</b>  | -25.4                   | -11.9                   | -23.7                   |
| <b>TSB</b>   | -10.0                   | 16.9                    | -34.6                   |
| <b>S3</b>    | -13.3                   | 14.1                    | -41.2                   |
| <b>TSC</b>   | -6.2                    | 20.6                    | -31.3                   |
| <b>S4</b>    | -30.3                   | -18.2                   | -32.7                   |
| <b>[BO]·</b> | -20.4                   | -22.9                   | -30.0                   |
| <b>Pro</b>   | -103.1                  | -103.6                  | -102.0                  |

**Table S5.** The gas phase relative electronic energies ( $\Delta E_{\text{gas}}$ ), gas phase relative free energies ( $\Delta G_{\text{gas}}$ ) and solvation corrected relative electronic energies ( $\Delta E_{\text{sol}}$ ) in kcal/mol calculated for species involved in **Figure 4**.

| Species      | $\Delta E_{\text{gas}}$ | $\Delta G_{\text{gas}}$ | $\Delta E_{\text{sol}}$ |
|--------------|-------------------------|-------------------------|-------------------------|
| <b>1</b>     | 0                       | 0                       | 0                       |
| <b>TSB-1</b> | 17.0                    | 30.5                    | -10.0                   |
| <b>S3-1</b>  | 14.9                    | 28.8                    | -12.9                   |
| <b>TSC-1</b> | 32.5                    | 46.3                    | 6.5                     |
| <b>BOB</b>   | -103.1                  | -103.6                  | -102.0                  |

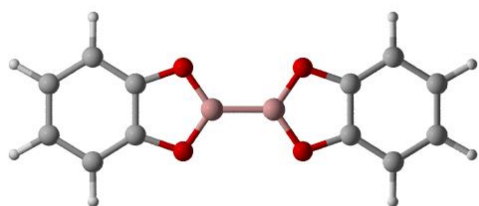

**1**

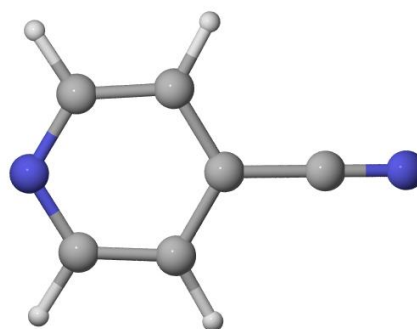

**2**

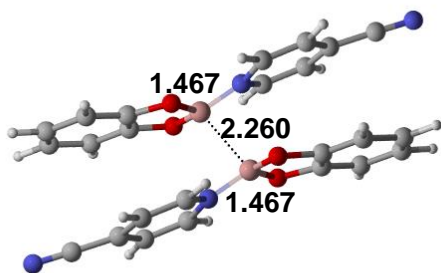

**TSA**

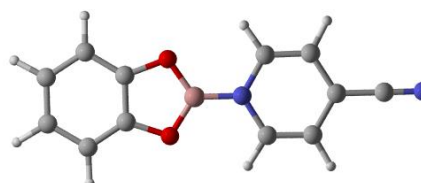

**[B]**

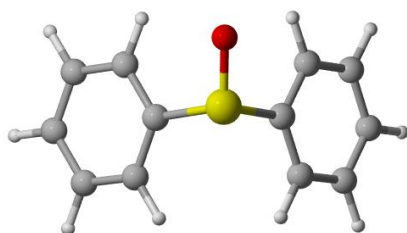

**7**

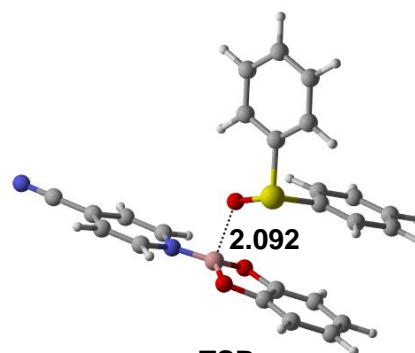

**TSB**

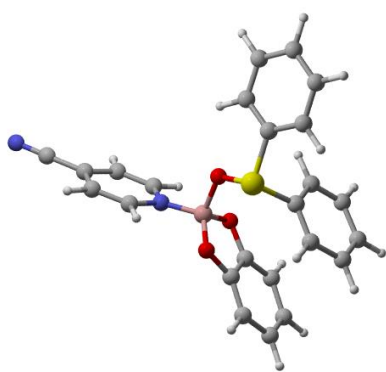

S3

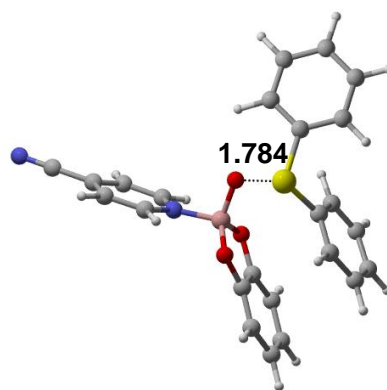

TSC

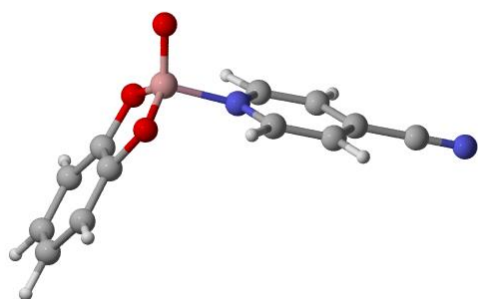

S4

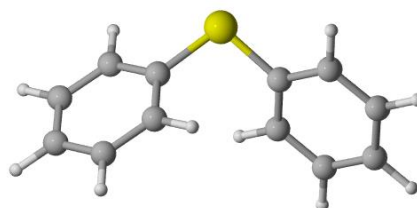

8

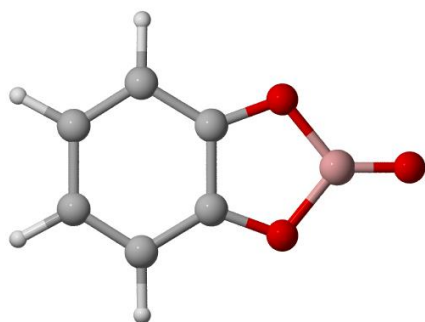

[BO]

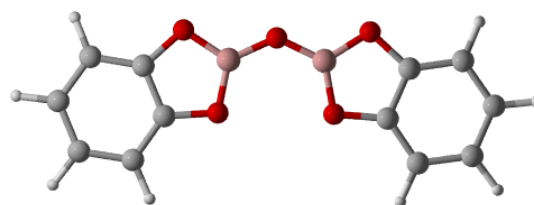

Bcat-O-Bcat

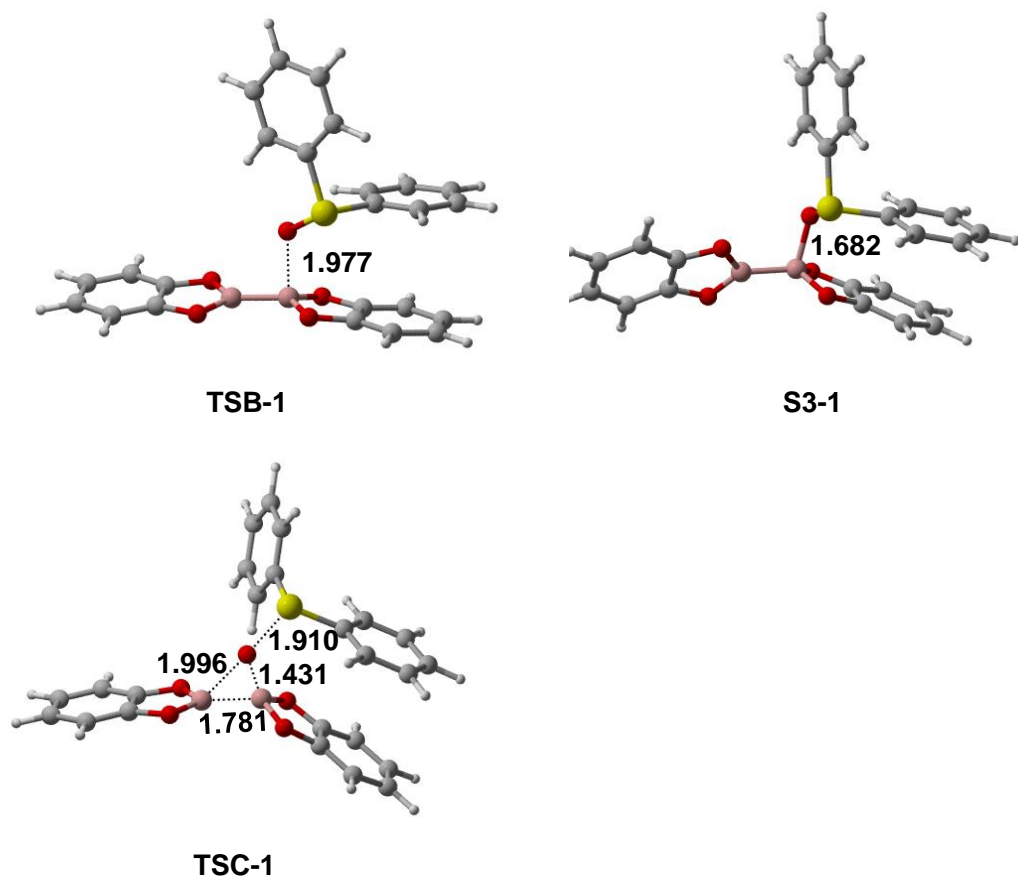

**Figure S7.** Optimized structures of some species involved in Figure S5 and Figure 4 with M062x/6-311G(d). 3D geometric structures of relative transition states are given in Angstrom ( $\text{\AA}$ ).

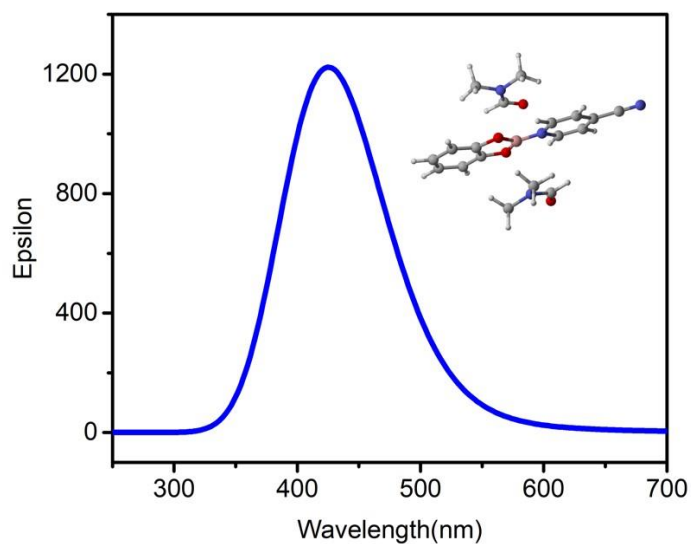

**Figure S8.** The calculated UV-Vis absorption of boryl radical in DMF proposed in Figure 1f.



**Cartesian coordinates for the complexes calculated in this study: [gas phase results optimized at the level of M062x/6-311G(d)**

**Cartesian coordinates in Figrue S4**

|      |             |             |             |             |             |             |             |
|------|-------------|-------------|-------------|-------------|-------------|-------------|-------------|
| 1    |             |             |             | H           | -3.58213600 | -2.16769500 | -0.00034600 |
| 01   |             |             |             | H           | -3.58224500 | 2.16772700  | -0.00009000 |
| C    |             |             |             | H           | -1.10986100 | 2.09838900  | 0.00001100  |
| C    |             |             |             | C           | -5.21959500 | -0.00007700 | 0.00014600  |
| C    |             |             |             | N           | -6.37534400 | -0.00015900 | 0.00037100  |
| C    | -4.09412900 | -1.42716300 | -0.00163300 | <b>TS1</b>  |             |             |             |
| C    | -2.92493200 | -0.69468100 | -0.00076600 | 02          |             |             |             |
| C    | -2.92520500 | 0.69480600  | 0.00078800  | C           | 4.48693200  | 0.71043900  | 1.15254400  |
| C    | -4.09468200 | 1.42683900  | 0.00156000  | C           | 3.38244900  | 0.08105900  | 0.62460300  |
| C    | -5.28466300 | 0.69729300  | 0.00068700  | C           | 3.43978200  | -0.61265500 | -0.58452300 |
| C    | -5.28439300 | -0.69807300 | -0.00087100 | C           | 4.60382600  | -0.70902200 | -1.31247500 |
| H    | -4.07808300 | -2.50957300 | -0.00283300 | C           | 5.73340600  | -0.07376100 | -0.78404300 |
| H    | -4.07904600 | 2.50925600  | 0.00277100  | C           | 5.67591700  | 0.61999700  | 0.42012200  |
| H    | -6.22931700 | 1.22770700  | 0.00124000  | C           | 4.42544000  | 1.24960500  | 2.08926300  |
| H    | -6.22884200 | -1.22885300 | -0.00150800 | H           | 4.63292100  | -1.24994800 | -2.24994200 |
| O    | -1.62799000 | 1.13878100  | 0.00136000  | H           | 6.66938600  | -0.12335000 | -1.32746200 |
| O    | -1.62755100 | -1.13815600 | -0.00118600 | H           | 6.56782800  | 1.10367800  | 0.80011300  |
| B    | -0.84126700 | 0.00047000  | 0.00005600  | O           | 2.20448700  | -1.14405300 | -0.87125900 |
| C    | 4.09412800  | -1.42716200 | 0.00156100  | O           | 2.11450200  | 0.00078500  | 1.14330100  |
| C    | 2.92493300  | -0.69467700 | 0.00080100  | B           | 1.38496600  | -0.63181600 | 0.13463900  |
| C    | 2.92520300  | 0.69481200  | -0.00075400 | C           | -0.67191500 | -0.74662000 | 1.46812200  |
| C    | 4.09468500  | 1.42683900  | -0.00163300 | C           | -2.01624000 | -0.98398200 | 1.53236500  |
| C    | 5.28466300  | 0.69729000  | -0.00087700 | C           | -2.62883100 | -1.79734900 | 0.56091200  |
| C    | 5.28439300  | -0.69807700 | 0.00068200  | C           | -1.79652200 | -2.46524000 | -0.37817100 |
| H    | 4.07806800  | -2.50957200 | 0.00276700  | C           | -0.46581900 | -2.19050600 | -0.40875100 |
| H    | 4.07906300  | 2.50925600  | -0.00283800 | N           | 0.10046000  | -1.28997200 | 0.46529400  |
| H    | 6.22931700  | 1.22770400  | -0.00151900 | H           | -0.14673000 | -0.11153100 | 2.17007300  |
| H    | 6.22884300  | -1.22885400 | 0.00123100  | H           | -2.60703400 | -0.50861900 | 2.30474900  |
| O    | 1.62799100  | 1.13878300  | -0.00118300 | H           | -2.21921000 | -3.16515000 | -1.08686100 |
| O    | 1.62755100  | -1.13815900 | 0.00136100  | H           | 0.21551000  | -2.62689000 | -1.12684800 |
| B    | 0.84126400  | 0.00046300  | 0.00006800  | C           | -4.04276700 | -1.91641400 | 0.50116200  |
| 2    |             |             |             | N           | -5.19271400 | -1.97468600 | 0.42699400  |
| 01   |             |             |             | C           | -3.47851300 | 0.72611200  | -1.57586100 |
| C    | -1.50009200 | -1.13882800 | -0.00000200 | C           | -2.10305400 | 0.76371800  | -1.38968100 |
| C    | -0.11181900 | -1.20087900 | -0.00000400 | C           | -1.58709100 | 1.61574300  | -0.41794600 |
| C    | 0.59445500  | 0.00001700  | 0.00001100  | C           | -2.40486700 | 2.44883400  | 0.34461300  |
| C    | -0.11184300 | 1.20089300  | -0.00000300 | C           | -3.77469800 | 2.39183200  | 0.14543700  |
| C    | -1.50011600 | 1.13881100  | -0.00000200 | C           | -4.31640100 | 1.52556700  | -0.80485500 |
| N    | -2.19037500 | -0.00001500 | 0.00000600  | H           | -3.89946100 | 0.05334100  | -2.31372200 |
| H    | -2.08642800 | -2.05218100 | -0.00000300 | H           | -1.43459900 | 0.14035800  | -1.96779500 |
| H    | 0.40606800  | -2.15133600 | -0.00001500 | H           | -1.96060400 | 3.10227600  | 1.08317300  |
| H    | 0.40601500  | 2.15136600  | -0.00001500 | H           | -4.42630300 | 3.02211000  | 0.73874600  |
| H    | -2.08647100 | 2.05215200  | -0.00000500 | H           | -5.38972900 | 1.46873000  | -0.93891100 |
| C    | 2.03271600  | 0.00000700  | -0.00000300 | N           | -0.16929200 | 1.60535700  | -0.14241700 |
| N    | 3.18194800  | -0.00000200 | 0.00000200  | O           | 0.29071100  | 2.33927800  | 0.71140300  |
| 5    |             |             |             | O           | 0.54842600  | 0.81562300  | -0.81573600 |
| 01   |             |             |             | <b>INT1</b> |             |             |             |
| C    | 1.80757600  | 1.20742800  | -0.00029000 | 02          |             |             |             |
| C    | 0.41777300  | 1.21593500  | -0.00028800 | C           | -4.17301400 | -1.17075600 | -0.25958900 |
| C    | -0.24113400 | -0.00063300 | -0.00000200 | C           | -2.88285600 | -0.69068600 | -0.28089400 |
| C    | 0.41816800  | -1.21633700 | 0.00028300  | C           | -2.53226800 | 0.51044100  | 0.32770000  |
| C    | 1.80856800  | -1.20668900 | 0.00028800  | C           | -3.45406700 | 1.29292600  | 0.98562300  |
| C    | 2.49994600  | 0.00031000  | 0.00000300  | C           | -4.76829900 | 0.81648400  | 1.01495000  |
| H    | 2.34870400  | 2.14596200  | -0.00051400 | C           | -5.11925100 | -0.38619800 | 0.40692400  |
| H    | -0.14478900 | 2.14186700  | -0.00049900 | H           | -4.43121000 | -2.10657600 | -0.73843300 |
| H    | -0.14290700 | -2.14313900 | 0.00049300  | H           | -3.16536100 | 2.22613200  | 1.45186300  |
| H    | 2.34995800  | -2.14509900 | 0.00051900  | H           | -5.52872900 | 1.39820200  | 1.52173800  |
| H    | 3.58346700  | 0.00061900  | 0.00000500  | H           | -6.14788900 | -0.72332000 | 0.44899500  |
| N    | -1.71787900 | -0.00023200 | 0.00000100  | O           | -1.18522000 | 0.73273700  | 0.14759700  |
| O    | -2.26466600 | 0.00081900  | 1.07796000  | O           | -1.76472200 | -1.24791100 | -0.85999900 |
| O    | -2.26466800 | -0.00065300 | -1.07795700 | B           | -0.75600200 | -0.35412800 | -0.57758700 |
| [B]' |             |             |             | C           | 3.64680300  | 1.09285300  | -0.16769700 |
| 02   |             |             |             | C           | 4.86437400  | 0.78969200  | 0.41996600  |
| C    | 3.66521000  | -1.42623200 | 0.00010600  | C           | 5.08930600  | -0.46713200 | 0.97702500  |
| C    | 2.49826000  | -0.69566100 | 0.00002200  | C           | 4.08367300  | -1.42721600 | 0.94133100  |
| C    | 2.49830300  | 0.69571900  | -0.00003200 | C           | 2.85468100  | -1.14642400 | 0.35941600  |
| C    | 3.66535900  | 1.42613300  | -0.00000500 | C           | 2.64849500  | 0.11698800  | -0.19352600 |
| C    | 4.85778200  | 0.69612900  | 0.00007400  | H           | 3.44931900  | 2.06064000  | -0.60850000 |
| C    | 4.85772300  | -0.69637000 | 0.00013000  | H           | 5.64451000  | 1.54154200  | 0.44146700  |
| H    | 3.64984700  | -2.50858100 | 0.00015400  | H           | 6.04422400  | -0.69633100 | 1.43457400  |
| H    | 3.65019500  | 2.50848600  | -0.00004800 | H           | 4.25380700  | -2.40863300 | 1.36823100  |
| H    | 5.80128300  | 1.22818800  | 0.00009300  | H           | 2.07394300  | -1.89266100 | 0.31959900  |
| H    | 5.80118000  | -1.22850500 | 0.00019200  | N           | 1.40926700  | 0.47217000  | -0.76580900 |
| O    | 1.19760500  | 1.15001500  | -0.00010700 | O           | 0.53381800  | -0.60725600 | -0.96056600 |
| O    | 1.19750000  | -1.14984600 | 0.00000800  | O           | 1.18825600  | 1.50750900  | -1.39932100 |
| B    | 0.43132300  | 0.00014000  | -0.00004700 | <b>INT2</b> |             |             |             |
| C    | -1.71274300 | -1.20126300 | -0.00017400 | 01          |             |             |             |
| C    | -3.06550000 | -1.21676700 | -0.00021000 | C           | 4.49202557  | -1.73861382 | 0.92650380  |
| C    | -3.80684500 | 0.00000700  | -0.00011900 | C           | 3.18452982  | -1.82693638 | 0.50318082  |
| C    | -3.06558500 | 1.21681400  | -0.00006900 | C           | 2.85295177  | -2.14114289 | -0.81248995 |
| C    | -1.71281800 | 1.20135100  | -0.00002900 | C           | 3.81504514  | -2.38070774 | -1.76861306 |
| N    | -0.99513100 | 0.00008300  | -0.00005000 | C           | 5.14868499  | -2.29105942 | -1.35199844 |
| H    | -1.10970200 | -2.09823800 | -0.00021600 | C           | 5.47939059  | -1.97519983 | -0.03671008 |

|   |             |             |             |
|---|-------------|-------------|-------------|
| H | 4.73779728  | -1.48102292 | 1.94941876  |
| H | 3.54212724  | -2.62122121 | -2.78843288 |
| H | 5.93908654  | -2.47151568 | -2.07048037 |
| H | 6.52131423  | -1.90418619 | 0.25060827  |
| O | 1.48941709  | -2.09420376 | -0.96127738 |
| O | 2.03520697  | -1.56519504 | 1.20724263  |
| B | 1.01052076  | -1.71983076 | 0.28085992  |
| C | -3.49953362 | -0.81748671 | -0.78300700 |
| C | -4.82136583 | -0.93734198 | -0.37567591 |
| C | -5.14968680 | -1.67174108 | 0.75890455  |
| C | -4.13953893 | -2.29042837 | 1.48661648  |
| C | -2.81089017 | -2.17687899 | 1.09495832  |
| C | -2.49666623 | -1.43075345 | -0.03590454 |
| H | -3.23880447 | -0.24106624 | -1.66150672 |
| H | -5.59705743 | -0.44223851 | -0.94855289 |
| H | -6.18293797 | -1.75978377 | 1.07359882  |
| H | -4.38222573 | -2.86428462 | 2.37404281  |
| H | -2.02384197 | -2.64452130 | 1.67037997  |
| N | -1.14224150 | -1.37881773 | -0.51949763 |
| O | -0.26627356 | -1.42159321 | 0.61740843  |
| O | -0.87897203 | -0.20705053 | -1.20864933 |
| B | -0.86366548 | 1.04832767  | -0.47467334 |
| C | 1.67535364  | 1.02430093  | -0.94543735 |
| C | 1.04373539  | 1.59760556  | 1.22037800  |
| C | 3.01669040  | 1.13216399  | -0.63252314 |
| H | 1.32160577  | 0.71813258  | -1.92197129 |
| C | 2.36583444  | 1.73214873  | 1.61128739  |
| H | 0.20701356  | 1.73188924  | 1.89329206  |
| C | 3.36327869  | 1.49061285  | 0.67165360  |
| H | 3.77553054  | 0.91341184  | -1.37256226 |
| H | 2.61031466  | 1.99869360  | 2.63040727  |
| O | -1.20455694 | 2.14992680  | -1.34642453 |
| O | -1.65658980 | 1.14907204  | 0.72207435  |
| C | -2.56551268 | 2.13708596  | 0.46610364  |
| C | -3.63087426 | 2.53073249  | 1.24292145  |
| C | -4.42190302 | 3.58245264  | 0.75972058  |
| C | -4.13866321 | 4.19289229  | -0.45522266 |
| C | -3.05729289 | 3.77633972  | -1.24401876 |
| C | -2.28540957 | 2.74075156  | -0.76369167 |
| H | -3.84561100 | 2.03102059  | 2.17974046  |
| H | -5.27068890 | 3.91836820  | 1.34369074  |
| H | -4.76745274 | 5.00257485  | -0.80685130 |
| H | -2.83294769 | 4.23658490  | -2.19848260 |
| N | 0.72365488  | 1.25116733  | -0.02770091 |
| C | 4.74748540  | 1.57729753  | 1.05057802  |
| N | 5.85178225  | 1.64023072  | 1.36129590  |

## TS2

|     |             |             |             |
|-----|-------------|-------------|-------------|
| O 1 | 4.05568700  | -1.38370900 | 1.28801900  |
| C   | 2.81620400  | -1.68981100 | 0.77148800  |
| C   | 2.63713000  | -2.02394400 | -0.56867300 |
| C   | 3.68979600  | -2.07079100 | -1.45551800 |
| C   | 4.95285000  | -1.75041300 | -0.94529000 |
| C   | 5.13164900  | -1.41205100 | 0.39426600  |
| H   | 4.17875900  | -1.11320200 | 2.32954500  |
| H   | 3.53354000  | -2.32864400 | -2.49562300 |
| H   | 5.80992200  | -1.76531900 | -1.60783200 |
| H   | 6.12136700  | -1.15567900 | 0.75208200  |
| O   | 1.29826900  | -2.20382900 | -0.81740600 |
| O   | 1.59435900  | -1.66294900 | 1.39816900  |
| B   | 0.68431000  | -1.91756300 | 0.38533900  |
| C   | -3.81898600 | -1.79291800 | -1.03957400 |
| C   | -5.14569100 | -2.01790100 | -0.69786000 |
| C   | -5.47547800 | -2.55824200 | 0.54046500  |
| C   | -4.46388700 | -2.87377400 | 1.43943400  |
| C   | -3.13048700 | -2.65193600 | 1.11530400  |
| C   | -2.81667200 | -2.10595100 | -0.12423200 |
| H   | -3.55706600 | -1.38127700 | -2.00574700 |
| H   | -5.92520900 | -1.76803300 | -1.40834200 |
| H   | -6.51265000 | -2.73167200 | 0.80189400  |
| H   | -4.70930500 | -3.29245600 | 2.40879400  |
| H   | -2.34380900 | -2.88530900 | 1.81849900  |
| N   | -1.44458900 | -1.96376000 | -0.53838400 |
| O   | -0.64847400 | -1.80539300 | 0.62151200  |
| O   | -1.27474500 | -0.82889400 | -1.34213400 |
| B   | -1.47788300 | 0.42742900  | -0.79865900 |
| C   | 1.56019000  | 0.89354500  | -1.26335300 |
| C   | 1.03500100  | 1.30357200  | 0.93691300  |
| C   | 2.88344200  | 1.27127800  | -1.07762100 |
| H   | 1.19917700  | 0.54956300  | -2.22757900 |
| C   | 2.33028300  | 1.70623400  | 1.22625100  |
| H   | 0.26369800  | 1.27434500  | 1.69979900  |
| C   | 3.27099400  | 1.67724700  | 0.19703800  |
| H   | 3.59682600  | 1.22574400  | -1.88975700 |
| H   | 2.60754400  | 2.01492000  | 2.22569100  |
| O   | -1.60341800 | 1.50967900  | -1.67279300 |
| O   | -1.98011500 | 0.71428200  | 0.46906300  |
| C   | -2.25199200 | 2.05862900  | 0.42044700  |
| C   | -2.68545500 | 2.88210500  | 1.43583000  |
| C   | -2.87867000 | 4.23086900  | 1.11613700  |
| C   | -2.64251600 | 4.70999000  | -0.16850100 |
| C   | -2.20344700 | 3.86347600  | -1.19266400 |

## INT3

|     |             |             |             |
|-----|-------------|-------------|-------------|
| O 1 | 2.64056300  | 3.82896500  | -0.09263100 |
| C   | 1.63176900  | 2.89340900  | -0.04094200 |
| C   | 1.89552600  | 1.54796200  | 0.19333400  |
| C   | 3.16852300  | 1.06171300  | 0.38301400  |
| C   | 4.20038500  | 2.00448300  | 0.33048400  |
| C   | 3.94202400  | 3.35348800  | 0.09937900  |
| H   | 2.42807900  | 4.87444400  | -0.27558100 |
| H   | 3.34815100  | 0.00695200  | 0.56023100  |
| H   | 5.22253500  | 1.67514900  | 0.47234700  |
| H   | 4.76766300  | 4.05405900  | 0.06556100  |
| O   | 0.70394900  | 0.85683500  | 0.19364100  |
| O   | 0.27452700  | 3.07499400  | -0.19887300 |
| B   | -0.26292300 | 1.81469000  | -0.05973000 |
| C   | -3.91058700 | -1.17037300 | -0.13470400 |
| C   | -5.28608100 | -1.32843600 | -0.04253000 |
| C   | -6.10266900 | -0.24413000 | 0.26271300  |
| C   | -5.53132500 | 1.00368900  | 0.47670100  |
| C   | -4.15467500 | 1.17929900  | 0.38643500  |
| C   | -3.35256400 | 0.08762700  | 0.07476700  |
| H   | -3.27332300 | -2.01239800 | -0.37004600 |
| H   | -5.72007100 | -2.30703600 | -0.21183200 |
| H   | -7.17629400 | -0.37260800 | 0.33316500  |
| H   | -6.15810200 | 1.85596300  | 0.71249500  |
| H   | -3.70966500 | 2.15081500  | 0.54624300  |
| N   | -1.91825300 | 0.20255500  | 0.08129000  |
| O   | -1.59016700 | 1.55211400  | -0.19641500 |
| O   | -1.39775600 | -0.54328000 | -1.00294800 |
| C   | 1.99190900  | -2.91903700 | 1.47932100  |
| C   | 1.21380100  | -2.34050600 | 0.50078000  |
| C   | 1.67467100  | -2.17612300 | -0.80440100 |
| C   | 2.93035200  | -2.58754700 | -1.19314800 |
| C   | 3.72959900  | -3.17623900 | -0.20734800 |
| C   | 3.27124200  | -3.33759200 | 1.09803200  |
| H   | 1.62363200  | -3.03386800 | 2.49080200  |
| H   | 3.27496700  | -2.44705300 | -2.20974500 |
| H   | 4.72644900  | -3.51183500 | -0.46708200 |
| H   | 3.91791500  | -3.79651100 | 1.83625600  |
| O   | 0.71174700  | -1.53993900 | -1.54700400 |
| O   | -0.05334700 | -1.82614800 | 0.60221900  |
| B   | -0.28719200 | -1.26158600 | -0.63473700 |

## TS3

|     |             |             |             |
|-----|-------------|-------------|-------------|
| O 1 | 3.34557400  | -2.93754300 | 1.08772900  |
| C   | 2.32021200  | -2.33112900 | 0.39846100  |
| C   | 2.56401000  | -1.46956400 | -0.67323100 |
| C   | 3.84337800  | -1.18252300 | -1.09262000 |
| C   | 4.89468900  | -1.79347000 | -0.39661900 |
| C   | 4.65174900  | -2.65170900 | 0.66893200  |
| H   | 3.14019400  | -3.60399500 | 1.91624300  |
| H   | 4.01746100  | -0.51301700 | -1.92578700 |
| H   | 5.91580300  | -1.59146800 | -0.69822800 |
| H   | 5.48556200  | -3.10976200 | 1.18783700  |
| O   | 1.37891600  | -1.01782500 | -1.17829500 |
| O   | 0.97245200  | -2.44201400 | 0.60322900  |
| B   | 0.37265300  | -1.59031700 | -0.34790000 |
| C   | -3.76040500 | -0.12103200 | -0.57163300 |
| C   | -5.04214800 | -0.23747200 | -0.05631200 |
| C   | -5.40402400 | -1.39267200 | 0.63277400  |
| C   | -4.49207700 | -2.43316600 | 0.81739100  |
| C   | -3.20545700 | -2.32692400 | 0.31700200  |
| C   | -2.85829000 | -1.16867200 | -0.38266800 |
| H   | -3.42954300 | 0.75943700  | -1.10983400 |
| H   | -5.75868400 | 0.56326800  | -0.19207800 |
| H   | -6.40794600 | -1.48563900 | 1.03147500  |
| H   | -4.79002500 | -3.32403300 | 1.35689900  |
| H   | -2.47183500 | -3.11229700 | 0.44242900  |
| N   | -1.59061300 | -0.97354200 | -0.97150600 |
| O   | -0.86372100 | -2.10789000 | -0.98502400 |
| O   | -0.51933700 | -0.39582800 | 0.30487000  |
| C   | -0.66710600 | 4.36571600  | -0.38602300 |
| C   | -0.29674800 | 3.07770600  | -0.07119100 |
| C   | 0.94539200  | 2.78030200  | 0.48106500  |
| C   | 1.87918100  | 3.75687400  | 0.74544700  |
| C   | 1.51554000  | 5.06949800  | 0.43023900  |
| C   | 0.27235500  | 5.36716800  | -0.12227100 |
| H   | -1.63624900 | 4.58282100  | -0.81683500 |
| H   | 2.84201500  | 3.50836300  | 1.17296700  |
| H   | 2.21895800  | 5.87126100  | 0.61970900  |
| H   | 0.02564000  | 6.39608700  | -0.35459800 |
| O   | 1.03596200  | 1.42436500  | 0.68970800  |

|   |             |            |             |
|---|-------------|------------|-------------|
| O | -1.01432900 | 1.91086700 | -0.22034600 |
| B | -0.16696800 | 0.92472400 | 0.24757600  |

**INT4**

|     |             |             |             |
|-----|-------------|-------------|-------------|
| O 1 |             |             |             |
| C   | 1.26809700  | 1.33185700  | 0.00003300  |
| C   | -0.09622900 | 1.09401400  | -0.00002100 |
| C   | -0.54978700 | -0.22361200 | 0.00002200  |
| C   | 0.33406100  | -1.29485800 | -0.00010300 |
| C   | 1.70253600  | -1.05090900 | -0.00014300 |
| C   | 2.16458300  | 0.26085700  | 0.00005400  |
| H   | 1.64180300  | 2.34917400  | 0.00032800  |
| H   | -0.82071400 | 1.89933000  | -0.00005400 |
| H   | -0.07151200 | -2.30038200 | 0.00004300  |
| H   | 2.40451000  | -1.87616600 | -0.00029900 |
| H   | 3.23123300  | 0.45517700  | 0.00012300  |
| N   | -1.95410300 | -0.57972500 | 0.00051400  |
| O   | -2.70577200 | 0.35335500  | -0.00034900 |

**TS4A**

|     |             |             |             |
|-----|-------------|-------------|-------------|
| O 1 |             |             |             |
| C   | -3.92201400 | 0.07474600  | -1.57946900 |
| C   | -2.96510100 | 0.21509100  | -0.59934200 |
| C   | -3.12305600 | -0.33570000 | 0.67141700  |
| C   | -4.24997700 | -1.04976400 | 1.01578100  |
| C   | -5.23140500 | -1.19582200 | 0.02963800  |
| C   | -5.07156300 | -0.64663800 | -1.23872600 |
| H   | -3.78344100 | 0.50756500  | -2.56217400 |
| H   | -4.35928500 | -1.47072200 | 2.00714200  |
| H   | -6.13355800 | -1.74928400 | 0.26115700  |
| H   | -5.85074900 | -0.77872500 | -1.97978600 |
| O   | -2.03073300 | -0.05118900 | 1.44395400  |
| O   | -1.76397400 | 0.87436200  | -0.67043900 |
| B   | -1.15819900 | 0.63290100  | 0.58346300  |
| C   | 2.07109300  | 2.61700000  | 0.99052400  |
| C   | 2.99148400  | 3.38409000  | 0.28909500  |
| C   | 2.77592500  | 3.68791400  | -1.05088700 |
| C   | 1.63367900  | 3.22025700  | -1.69318800 |
| C   | 0.70313100  | 2.44730600  | -1.01088500 |
| C   | 0.93773200  | 2.15793700  | 0.33112100  |
| H   | 2.19738800  | 2.37463000  | 2.03670600  |
| H   | 3.87800400  | 3.74800400  | 0.79494300  |
| H   | 3.49516400  | 4.28968300  | -1.59417800 |
| H   | 1.46082400  | 3.45630800  | -2.73652300 |
| H   | -0.17859200 | 2.07651200  | -1.51413200 |
| N   | -0.02233400 | 1.38763700  | 1.13558300  |
| O   | 0.17650500  | 1.36001500  | 2.37428400  |
| C   | 2.85893500  | -2.89278700 | 1.10127400  |
| C   | 1.96253400  | -1.96422800 | 0.61809800  |
| C   | 1.70482700  | -1.82373400 | -0.74096200 |
| C   | 2.32890300  | -2.60281900 | -1.69082600 |
| C   | 3.24178900  | -3.54592500 | -1.21423700 |
| C   | 3.50052600  | -3.68729900 | -1.49066600 |
| H   | 3.04709200  | -2.99127300 | 2.16252000  |
| H   | 2.11581100  | -2.48292000 | -2.74517700 |
| H   | 3.75986700  | -4.18219200 | -1.92151300 |
| H   | 4.21525800  | -4.43156500 | 0.47875200  |
| O   | 0.76755500  | -0.82564100 | -0.91574600 |
| O   | 1.19730100  | -1.05729600 | 1.31686500  |
| B   | 0.48513200  | -0.40074800 | 0.35791600  |

**INT5**

|     |             |             |             |
|-----|-------------|-------------|-------------|
| O 1 |             |             |             |
| C   | 4.79827700  | 0.65285200  | 0.67317300  |
| C   | 3.48518200  | 0.26319800  | 0.53555800  |
| C   | 2.79148900  | 0.41818700  | -0.66134800 |
| C   | 3.37614100  | 0.97095200  | -1.77806200 |
| C   | 4.71009000  | 1.37155900  | -1.65124600 |
| C   | 5.40426300  | 1.21633300  | -0.45440000 |
| H   | 5.32496900  | 0.52591700  | 1.61034500  |
| H   | 2.82329100  | 1.08439300  | -2.70176900 |
| H   | 5.21158300  | 1.81210600  | -2.50445100 |
| H   | 6.43687600  | 1.53796000  | -0.39238100 |
| O   | 1.50947900  | -0.05840900 | -0.50590800 |
| O   | 2.65553100  | -0.31195100 | 1.47059300  |
| B   | 1.46216700  | -0.48857800 | 0.80430800  |
| C   | -0.41507700 | -3.51607800 | 0.67664600  |
| C   | -0.76859200 | -4.79128300 | 0.25024200  |
| C   | -1.80518300 | -4.97890800 | -0.65370300 |
| C   | -2.49115000 | -3.86769400 | -1.13412900 |
| C   | -2.15082700 | -2.58637500 | -0.72664200 |
| C   | -1.10695300 | -2.40769300 | 0.18751800  |
| H   | 0.38258800  | -3.38128300 | 1.39343800  |
| H   | -0.22347200 | -5.64430800 | 0.63830500  |
| H   | -2.07603600 | -5.97541000 | -0.98125100 |
| H   | -3.30125700 | -3.99408600 | -1.84350800 |
| H   | -2.68802900 | -1.73242900 | -1.11569900 |
| N   | -0.76025800 | -1.10891300 | 0.60691900  |
| O   | 0.38028900  | -1.04862900 | 1.41667000  |
| C   | -1.66289700 | 3.65138300  | 0.75991800  |
| C   | -1.72663900 | 2.29647700  | 0.52321000  |
| C   | -2.76228300 | 1.72622400  | -0.21033300 |

|   |             |            |             |
|---|-------------|------------|-------------|
| C | -3.78393300 | 2.48012700 | -0.74167900 |
| C | -3.73009300 | 3.85828800 | -0.50865200 |
| C | -2.69414000 | 4.42990200 | 0.22454800  |
| H | -0.85132300 | 4.08146400 | 1.33278300  |
| H | -4.58367400 | 2.02112000 | -1.30884400 |
| H | -4.51305300 | 4.49156100 | -0.90794800 |
| H | -2.68397000 | 5.50111000 | 0.38573400  |
| O | -2.56986600 | 0.36448900 | -0.28683600 |
| O | -0.85953300 | 1.31145300 | 0.92846600  |
| B | -1.39615200 | 0.13936700 | 0.41553700  |

**INT6**

|     |             |             |             |
|-----|-------------|-------------|-------------|
| O 1 |             |             |             |
| C   | -1.32445600 | 1.34712500  | -0.00854000 |
| C   | 0.03580400  | 1.05923000  | -0.05108900 |
| C   | 0.45780300  | -0.26731700 | -0.05298900 |
| C   | -0.48693600 | -1.29594200 | -0.01066600 |
| C   | -1.83970100 | -0.99521900 | 0.03261800  |
| C   | -2.26910400 | 0.32946000  | 0.03253500  |
| H   | -1.64440200 | 2.38327600  | -0.00263100 |
| H   | 0.77344000  | 1.84960000  | -0.06608600 |
| H   | -0.15574500 | -2.33006000 | -0.02176600 |
| H   | -2.56327200 | -1.80206500 | 0.06686100  |
| H   | -3.32664200 | 0.56238700  | 0.06689900  |
| N   | 1.82305100  | -0.61956000 | -0.17454400 |
| O   | 2.68346900  | 0.42577100  | 0.20992600  |
| H   | 3.19983700  | 0.60691300  | -0.58130400 |
| H   | 2.04721100  | -1.40332200 | 0.42920900  |

**INT7**

|     |             |             |             |
|-----|-------------|-------------|-------------|
| O 1 |             |             |             |
| C   | 1.31623800  | -1.35117000 | -0.00007300 |
| C   | -0.04673600 | -1.06824600 | -0.00013900 |
| C   | -0.43889300 | 0.25332300  | -0.00006800 |
| C   | 0.46815300  | 1.30175700  | 0.00001500  |
| C   | 1.82646300  | 1.00789600  | 0.00014900  |
| C   | 2.24873500  | -0.31932000 | 0.00005400  |
| H   | 1.64955600  | -2.38242300 | -0.00011700 |
| H   | -0.82867700 | -1.81687600 | -0.00022200 |
| H   | 0.12631700  | 2.33554600  | 0.00007100  |
| H   | 2.55265100  | 1.81224700  | 0.00026400  |
| H   | 3.30850900  | -0.54657200 | 0.00011100  |
| N   | -1.90118400 | 0.53700000  | -0.00026700 |
| O   | -2.69933700 | -0.54772700 | 0.00043900  |
| H   | -2.07458800 | 1.13929900  | 0.81845100  |
| H   | -2.07454200 | 1.13815000  | -0.81983600 |

**TS5**

|     |             |             |             |
|-----|-------------|-------------|-------------|
| O 1 |             |             |             |
| C   | 3.77012600  | 2.04765200  | 1.20433700  |
| C   | 2.57723300  | 2.38651700  | 0.58718300  |
| C   | 2.27864900  | 1.83094500  | -0.65412600 |
| C   | 3.13775200  | 0.92345200  | -1.26315100 |
| C   | 4.33307900  | 0.59361500  | -0.63492300 |
| C   | 4.65153800  | 1.15617100  | 0.59304600  |
| H   | 4.00822600  | 2.46968200  | 2.17335500  |
| H   | 1.86460300  | 3.04482900  | 1.07237000  |
| H   | 2.86253000  | 0.45979600  | -2.20483900 |
| H   | 4.99375600  | -0.13058200 | -1.09505400 |
| H   | 5.57473500  | 0.88255600  | 1.08968500  |
| N   | 1.03316300  | 2.14412600  | -1.27864700 |
| O   | -0.34241200 | 1.34369500  | -0.70252600 |
| H   | 0.72993200  | 3.10171900  | -1.14239600 |
| H   | 1.00051700  | 1.88945400  | -2.26013300 |
| C   | -6.36912100 | -0.36051900 | -0.35228400 |
| C   | -6.26848100 | 0.09127000  | 0.96288200  |
| C   | -5.02979900 | 0.37876300  | 1.54145200  |
| C   | -3.91832800 | 0.19518200  | 0.74560800  |
| C   | -4.01866000 | -0.25549000 | -0.56665000 |
| C   | -5.23559300 | -0.54513200 | -1.14781200 |
| H   | -7.34679200 | -0.57508700 | -0.76730800 |
| H   | -7.16938900 | 0.22082100  | 1.55084100  |
| H   | -4.93547700 | 0.72696600  | 2.56226900  |
| H   | -5.29797200 | -0.89815200 | -2.16943900 |
| B   | -0.12132300 | 0.02354200  | -0.22568100 |
| B   | -1.89225400 | 0.05104300  | -0.09623900 |
| O   | -2.59795800 | 0.39512300  | 1.04728500  |
| O   | -2.76227700 | -0.34253700 | -1.10367200 |
| O   | 0.60545300  | -0.14740700 | 1.02808300  |
| O   | 0.49498700  | -0.89763500 | -1.18313900 |
| C   | 3.52060200  | -2.37916800 | 1.14194400  |
| C   | 3.44556100  | -2.84168700 | -0.16738500 |
| C   | 2.42819500  | -2.40989300 | -1.02963700 |
| C   | 1.51258900  | -1.50525500 | -0.53120700 |
| C   | 1.58609900  | -1.04193300 | 0.79070900  |
| C   | 2.58041300  | -1.47032000 | 1.64513400  |
| H   | 4.31417500  | -2.73441000 | 1.78965000  |
| H   | 4.17905600  | -3.55442200 | -0.52711600 |
| H   | 2.35488300  | -2.76257100 | -2.05192800 |
| H   | 2.62948500  | -1.09733400 | 2.66121700  |

**6**

|     |             |             |             |
|-----|-------------|-------------|-------------|
| O 1 |             |             |             |
| C   | 1.16735000  | -1.19782600 | 0.00363100  |
| C   | -0.22042100 | -1.20305100 | -0.00591900 |
| C   | -0.93473100 | -0.00001900 | -0.00878500 |
| C   | -0.22055000 | 1.20297700  | -0.00594700 |
| C   | 1.16732000  | 1.19784600  | 0.00367600  |
| C   | 1.87450100  | 0.00008100  | 0.00901200  |
| H   | 1.70038900  | -2.14238900 | 0.00700700  |
| H   | -0.76171700 | -2.14427300 | -0.01725600 |
| H   | -0.76185000 | 2.14419300  | -0.01746800 |
| H   | 1.70015800  | 2.14252100  | 0.00718400  |
| H   | 2.95771700  | 0.00002000  | 0.01713900  |
| N   | -2.32896300 | -0.00002500 | -0.07755800 |
| H   | -2.76643100 | -0.83350300 | 0.28620200  |
| H   | -2.76634100 | 0.83355600  | 0.28609200  |

### Cartesian coordinates in Figure 3

#### TS4B

|     |             |             |             |
|-----|-------------|-------------|-------------|
| O 2 |             |             |             |
| C   | 4.09087600  | 0.87891800  | 1.23439500  |
| C   | 3.02877200  | 0.13582500  | 0.77083900  |
| C   | 3.18077000  | -0.82978600 | -0.22272900 |
| C   | 4.40338500  | -1.09236100 | -0.79876700 |
| C   | 5.48975700  | -0.34136500 | -0.33838500 |
| C   | 5.33780100  | 0.62135400  | 0.65503600  |
| H   | 3.95863300  | 1.62314600  | 2.00964200  |
| H   | 4.50613200  | -1.84315200 | -1.57173500 |
| H   | 6.46954200  | -0.51413100 | -0.76706300 |
| H   | 6.20087900  | 1.18521100  | 0.98776600  |
| O   | 1.96864700  | -1.42387400 | -0.47713400 |
| O   | 1.71061700  | 0.18251500  | 1.16736800  |
| B   | 1.07941700  | -0.70776700 | 0.30632400  |
| C   | -1.08822200 | -0.50475700 | 1.46463500  |
| C   | -2.43495900 | -0.68185200 | 1.50485900  |
| C   | -3.07157400 | -1.51122600 | 0.54826600  |
| C   | -2.25852300 | -2.15396200 | -0.41613100 |
| C   | -0.91111800 | -1.95713000 | -0.42183600 |
| N   | -0.30639100 | -1.11244200 | 0.49423700  |
| H   | -0.55357300 | 0.12139300  | 2.16471900  |
| H   | -3.01407200 | -0.18158200 | 2.26976000  |
| H   | -2.69972800 | -2.81130000 | -1.15393600 |
| H   | -0.24667100 | -2.41675700 | -1.13961000 |
| C   | -4.48095900 | -1.66739400 | 0.54042200  |
| N   | -5.62939000 | -1.78327000 | 0.52858200  |
| C   | -3.15210700 | 1.96512000  | -0.92846200 |
| C   | -2.09539400 | 1.24230800  | -1.45972700 |
| C   | -0.81679200 | 1.42707800  | -0.93306700 |
| C   | -0.58552600 | 2.31804500  | 0.11264900  |
| C   | -1.64697200 | 3.05459900  | 0.62326200  |
| C   | -2.92773100 | 2.87200500  | 0.10813400  |
| H   | -4.15491400 | 1.81973900  | -1.31318200 |
| H   | -2.23511000 | 0.52329100  | -2.25749700 |
| H   | 0.41999700  | 2.41404600  | 0.50742800  |
| H   | -1.47987600 | 3.76177400  | 1.42727600  |
| H   | -3.75863500 | 3.43511000  | 0.51777600  |
| N   | 0.28981500  | 0.61306600  | -1.34007100 |
| O   | 0.11363500  | -0.04013400 | -2.34680300 |

#### INT4-B

|     |             |             |             |
|-----|-------------|-------------|-------------|
| O 2 |             |             |             |
| C   | 3.82525900  | -1.01999200 | -0.03154600 |
| C   | 2.49552500  | -0.65873900 | -0.02524000 |
| C   | 2.09589800  | 0.67097200  | 0.03720600  |
| C   | 2.99915900  | 1.70879100  | 0.09681700  |
| C   | 4.35113400  | 1.35490700  | 0.09096800  |
| C   | 4.75382500  | 0.02228800  | 0.02826600  |
| H   | 4.12257400  | -2.05957300 | -0.08020200 |
| H   | 2.67144500  | 2.73929400  | 0.14639000  |
| H   | 5.10063800  | 2.13560100  | 0.13689900  |
| H   | 5.81116100  | -0.21330800 | 0.02593000  |
| O   | 0.71842000  | 0.72275200  | 0.02824300  |
| O   | 1.38591200  | -1.46488400 | -0.07453600 |
| B   | 0.31973800  | -0.59833500 | -0.03892200 |
| C   | -3.46259100 | -0.92613800 | 0.16560200  |
| C   | -4.63518400 | -0.18653700 | 0.19670700  |
| C   | -4.60432700 | 1.19557200  | 0.03643600  |
| C   | -3.38553900 | 1.83427600  | -0.15904200 |
| C   | -2.20057400 | 1.10916900  | -0.19443300 |
| C   | -2.24427600 | -0.27531800 | -0.02782900 |
| H   | -3.46861300 | -2.00064200 | 0.28453700  |
| H   | -5.57995300 | -0.69566400 | 0.34857000  |
| H   | -5.52320900 | 1.76938700  | 0.06218100  |
| H   | -3.35009000 | 2.90963700  | -0.29017300 |
| H   | -1.26090400 | 1.61887900  | -0.35165900 |
| N   | -1.05526800 | -1.07038900 | -0.06044400 |
| O   | -1.18742000 | -2.34470700 | -0.07223600 |

#### TS4-B-oss

O 1

|   |             |             |             |
|---|-------------|-------------|-------------|
| C | 4.51770100  | 0.20171400  | -0.72124300 |
| C | 3.21712700  | -0.00931500 | -1.12323100 |
| C | 2.78165100  | -1.23051200 | -1.62706700 |
| C | 3.63461500  | -2.30393900 | -1.77166300 |
| C | 4.96007100  | -2.10267300 | -1.37685100 |
| C | 5.38992200  | -0.88118500 | -0.86049700 |
| H | 4.83044100  | 1.14434600  | -0.29138300 |
| H | 3.28342800  | -3.24946500 | -2.16490300 |
| H | 5.66724200  | -2.91824800 | -1.46904300 |
| H | 6.42125200  | -0.76749600 | -0.54998500 |
| O | 1.43693900  | -1.16456800 | -1.88606000 |
| O | 2.14490900  | 0.85534200  | -1.06114600 |
| B | 1.06738400  | 0.09866200  | -1.47706300 |
| C | -2.21625800 | 2.02280400  | -1.30636800 |
| C | -2.73368200 | 3.30513300  | -1.18569200 |
| C | -1.88857900 | 4.40717900  | -1.10276100 |
| C | -0.51112700 | 4.21649200  | -1.14758400 |
| C | 0.02644800  | 2.94203600  | -1.26817700 |
| C | -0.83271000 | 1.84272700  | -1.34088100 |
| H | -2.86181100 | 1.15790300  | -1.37283700 |
| H | -3.80876900 | 3.44174200  | -1.15929000 |
| H | -2.29872000 | 5.40567900  | -1.00858200 |
| H | 0.15775500  | 5.06741000  | -1.08873500 |
| H | 1.09904100  | 2.80726500  | -1.29153900 |
| N | -0.32416500 | 0.51733400  | -1.45535000 |
| O | -1.17337500 | -0.45636400 | -1.51465300 |
| C | -4.09757000 | -3.76602500 | -0.94178000 |
| C | -3.40509900 | -2.72868600 | -0.35971900 |
| C | -4.02441400 | -1.52619300 | -0.02578400 |
| C | -5.36269500 | -1.30515400 | -0.26038200 |
| C | -6.07671500 | -2.35185600 | -0.85343600 |
| C | -5.45854500 | -3.55344500 | -1.18596000 |
| H | -3.60312000 | -4.69413000 | -1.19853100 |
| H | -5.83055200 | -0.36593700 | 0.00670100  |
| H | -7.13255100 | -2.22120500 | -1.05765800 |
| H | -6.04109100 | -4.34265300 | -1.64569800 |
| O | -3.10143100 | -0.67913200 | 0.54203800  |
| O | -2.07622800 | -2.67064900 | -0.01144800 |
| B | -1.90918500 | -1.38242300 | 0.46088400  |
| C | 0.46348100  | -1.68697900 | 1.04403600  |
| C | 1.66536200  | -1.19841700 | 1.45112800  |
| C | 1.77446100  | 0.14252300  | 1.91149800  |
| C | 0.59937300  | 0.92974200  | 1.91077500  |
| C | -0.58604400 | 0.40000300  | 1.50169700  |
| N | -0.68883100 | -0.91688200 | 1.08271300  |
| H | 0.33609800  | -2.68847000 | 0.65672500  |
| H | 2.54093300  | -1.83393300 | 1.40316500  |
| H | 0.63311300  | 1.96722200  | 2.21688800  |
| H | -1.50407500 | 0.97123600  | 1.47045100  |
| C | 3.02848200  | 0.69632900  | 2.26577800  |
| N | 4.05514200  | 1.15257900  | 2.53437300  |

#### TS4-B-ts

|     |             |             |             |
|-----|-------------|-------------|-------------|
| O 3 |             |             |             |
| C   | 4.27522400  | 0.34909200  | -0.98715400 |
| C   | 2.99034700  | -0.07204300 | -1.24504800 |
| C   | 2.67339400  | -1.40755100 | -1.46174100 |
| C   | 3.63296100  | -2.39643300 | -1.44064900 |
| C   | 4.94355900  | -1.98471900 | -1.18049000 |
| C   | 5.25674300  | -0.64493200 | -0.95512800 |
| H   | 4.50386000  | 1.38705800  | -0.78231500 |
| H   | 3.37293500  | -3.43422800 | -1.60581500 |
| H   | 5.73219700  | -2.72673700 | -1.14709000 |
| O   | 6.27877600  | -0.36336500 | -0.73377800 |
| H   | 1.31474100  | -1.53318100 | -1.62437900 |
| O   | 1.82750900  | 0.66985800  | -1.26104400 |
| B   | 0.82874200  | -0.25673600 | -1.47283500 |
| C   | -2.61637000 | 1.36791400  | -1.60391700 |
| C   | -3.27703000 | 2.57301000  | -1.42018600 |
| C   | -2.57874800 | 3.70962000  | -1.02222500 |
| C   | -1.20618000 | 3.63277100  | -0.81573100 |
| C   | -0.52634800 | 2.43326900  | -0.99361700 |
| C   | -1.24066000 | 1.29947000  | -1.38245100 |
| H   | -3.14762600 | 0.47360000  | -1.90094600 |
| H   | -4.34638200 | 2.62232700  | -1.59239200 |
| H   | -3.09955800 | 4.64940400  | -0.88080300 |
| H   | -0.65152400 | 4.51351000  | -0.51271900 |
| H   | 0.53991600  | 2.38511400  | -0.82344000 |
| N   | -0.60032500 | 0.02919300  | -1.53498100 |
| O   | -1.34978700 | -0.99405900 | -1.72856800 |
| C   | -3.81894000 | -2.78577700 | 0.36120100  |
| C   | -2.97130400 | -1.79050100 | 0.79171400  |
| C   | -3.41012800 | -0.48576400 | 0.99321800  |
| C   | -4.71727200 | -0.11031700 | 0.77870300  |
| C   | -5.58905300 | -1.11271700 | 0.34310100  |
| C   | -5.14918500 | -2.41866100 | 0.13829300  |
| H   | -3.46109300 | -3.79368300 | 0.19597800  |
| H   | -5.03743500 | 0.91204000  | 0.93556000  |
| H   | -6.62774500 | -0.86621100 | 0.15868300  |
| H   | -5.85193200 | -3.16836400 | -0.20465200 |
| O   | -2.34898200 | 0.29301700  | 1.39797800  |
| O   | -1.62605700 | -1.86676200 | 1.07596600  |

|   |             |             |            |
|---|-------------|-------------|------------|
| B | -1.27547800 | -0.57341100 | 1.39614300 |
| C | 1.13170500  | -1.06024900 | 1.56140100 |
| C | 2.41495800  | -0.66177000 | 1.72968300 |
| C | 2.71846600  | 0.70044200  | 2.02007600 |
| C | 1.62464700  | 1.60584200  | 2.13924800 |
| C | 0.35216500  | 1.17806700  | 1.96431800 |
| N | 0.06670700  | -0.15729800 | 1.66832100 |
| H | 0.85187000  | -2.07756700 | 1.32407600 |
| H | 3.21391200  | -1.38524800 | 1.61880500 |
| H | 1.80387500  | 2.64955200  | 2.36334200 |
| H | -0.50773000 | 1.83055100  | 2.02650900 |
| C | 4.05498200  | 1.14130000  | 2.13660900 |
| N | 5.15081400  | 1.50465000  | 2.20515400 |

### Cartesian coordinates in Fisure S5

#### TSA

|    |             |             |             |
|----|-------------|-------------|-------------|
| 01 |             |             |             |
| C  | 3.58870300  | -1.65245100 | -1.42023800 |
| C  | 2.42760600  | -1.48468700 | -0.69682600 |
| C  | 2.42774900  | -1.48463000 | 0.69671600  |
| C  | 3.58899600  | -1.65233500 | 1.41990200  |
| C  | 4.77400000  | -1.82682600 | 0.69500000  |
| C  | 4.77385600  | -1.82687900 | -0.69556500 |
| H  | 3.57462700  | -1.64041000 | -2.50343600 |
| H  | 3.57514400  | -1.64020500 | 2.50310200  |
| H  | 5.70897100  | -1.94892100 | 1.22804500  |
| H  | 5.70871700  | -1.94901700 | -1.22879200 |
| O  | 1.15980500  | -1.25458800 | 1.16840800  |
| O  | 1.15956600  | -1.25468000 | -1.16827300 |
| B  | 0.37926400  | -1.06437700 | 0.00014100  |
| B  | -0.37926000 | 1.06434500  | 0.00002000  |
| C  | -3.58874100 | 1.65239400  | -1.42031300 |
| C  | -2.42762800 | 1.48464500  | -0.69692200 |
| C  | -2.42772000 | 1.48476100  | 0.69661700  |
| C  | -3.58893000 | 1.65263000  | 1.41982700  |
| C  | -4.77394600 | 1.82711900  | 0.69494700  |
| C  | -4.77385300 | 1.82700200  | -0.69561900 |
| H  | -3.57470500 | 1.64021400  | -2.50351000 |
| H  | -3.57503800 | 1.64062800  | 2.50302700  |
| H  | -5.70888900 | 1.94934300  | 1.22801100  |
| H  | -5.70872500 | 1.94914400  | -1.22882800 |
| O  | -1.15977600 | 1.25469500  | 1.16828600  |
| O  | -1.15962200 | 1.25448800  | -1.16838400 |
| C  | 1.72082700  | 1.57857300  | 1.18538800  |
| C  | 3.08534000  | 1.65635500  | 1.20598400  |
| C  | 3.80570000  | 1.64109900  | 0.00010600  |
| C  | 3.08540900  | 1.65620700  | -1.20581300 |
| C  | 1.72089300  | 1.57843900  | -1.18528400 |
| H  | 1.11204700  | 1.56132200  | 2.07774000  |
| H  | 3.60244500  | 1.70919000  | 2.15507600  |
| H  | 3.60256800  | 1.70892600  | -2.15488300 |
| H  | 1.11216100  | 1.56108600  | -2.07766600 |
| C  | 5.23078700  | 1.61127800  | 0.00014800  |
| N  | 6.38201100  | 1.56766300  | 0.00018300  |
| N  | 1.03367800  | 1.46031100  | 0.00004000  |
| C  | -1.72088500 | -1.57845000 | 1.18556300  |
| C  | -3.08540000 | -1.65621200 | 1.20611300  |
| C  | -3.80570600 | -1.64116100 | 0.00019900  |
| C  | -3.08536700 | -1.65645100 | -1.20568800 |
| C  | -1.72084900 | -1.57868800 | -1.18511000 |
| H  | -1.11214500 | -1.56103600 | -2.07793900 |
| H  | -3.60254800 | -1.70888700 | 2.15519100  |
| H  | -3.60248500 | -1.70931100 | -2.15477200 |
| H  | -1.11207700 | -1.56145100 | -2.07746900 |
| C  | -5.23079400 | -1.61139700 | 0.00017700  |
| N  | -6.38202100 | -1.56782900 | 0.00016100  |
| N  | -1.03368900 | -1.46039900 | 0.00022500  |

#### [B]'

|    |             |             |             |
|----|-------------|-------------|-------------|
| 02 |             |             |             |
| C  | 3.66521000  | -1.42623200 | 0.00010600  |
| C  | 2.49826000  | -0.69566100 | 0.00002200  |
| C  | 2.49830300  | 0.69571900  | -0.00003200 |
| C  | 3.66535900  | 1.42613300  | -0.00000500 |
| C  | 4.85778200  | 0.69612900  | 0.00007400  |
| C  | 4.85772300  | -0.69637000 | 0.00013000  |
| H  | 3.64984700  | -2.50858100 | 0.00015400  |
| H  | 3.65019500  | 2.50848600  | -0.00004800 |
| H  | 5.80128300  | 1.22818800  | 0.00009300  |
| H  | 5.80118000  | -1.22850500 | 0.00019200  |
| O  | 1.19760500  | 1.15001500  | -0.00010700 |
| O  | 1.19750000  | -1.14984600 | 0.00000800  |
| B  | 0.43132300  | 0.00014000  | -0.00004700 |
| C  | -1.71274300 | -1.20126300 | -0.00017400 |
| C  | -3.06550000 | -1.21676700 | -0.00021000 |
| C  | -3.80684500 | 0.00000700  | -0.00011900 |
| C  | -3.06558500 | 1.21681400  | -0.00006900 |
| C  | -1.71281800 | 1.20135100  | -0.00002900 |
| N  | -0.99513100 | 0.00008300  | -0.00005000 |
| H  | -1.10970200 | -2.09823800 | -0.00021600 |
| H  | -3.58213600 | -2.16769500 | -0.00034600 |

|   |             |             |             |
|---|-------------|-------------|-------------|
| H | -3.58224500 | 2.16772700  | -0.00009000 |
| H | -1.10986100 | 2.09838900  | 0.00001100  |
| C | -5.21959500 | -0.00007700 | 0.00014600  |
| N | -6.37534400 | -0.00015900 | 0.000037100 |

#### 7

|    |             |             |             |
|----|-------------|-------------|-------------|
| 01 |             |             |             |
| C  | 3.00768000  | -0.05535800 | 1.36773400  |
| C  | 1.96283900  | 0.69514500  | 0.84225100  |
| C  | 1.35293300  | 0.26735200  | -0.32541600 |
| C  | 1.77482200  | -0.87477600 | -0.99203700 |
| C  | 2.81669100  | -1.62108700 | -0.45642700 |
| C  | 3.43029200  | -1.21270500 | 0.72336600  |
| H  | 3.49529900  | 0.26712400  | 2.28148200  |
| H  | 1.61955400  | 1.61292200  | 1.30800300  |
| H  | 1.30328900  | -1.18071000 | -1.92107900 |
| H  | 3.15570400  | -2.51722300 | -0.96492700 |
| H  | 4.24749100  | -1.79454200 | 1.13615900  |
| S  | 0.00001200  | 1.27570400  | -0.99565300 |
| C  | -1.35297600 | 0.26755400  | -0.32530900 |
| C  | -1.77566900 | -0.87397800 | -0.99242900 |
| C  | -1.96209200 | 0.69485100  | 0.84296200  |
| C  | -2.81752000 | -1.62025000 | -0.45670700 |
| H  | -1.30480700 | -1.17944700 | -1.92196600 |
| C  | -3.00691600 | -0.05558800 | 1.36854300  |
| H  | -1.61824400 | 1.61223600  | 1.30907200  |
| C  | -3.43030300 | -1.21238700 | 0.72368200  |
| H  | -3.15716900 | -2.51592400 | -0.96559600 |
| H  | -3.49392600 | 0.26650100  | 2.28275500  |
| H  | -4.24748900 | -1.79417900 | 1.13656500  |
| O  | 0.00017800  | 2.55241700  | -0.20891100 |

#### TSB

|    |             |             |             |
|----|-------------|-------------|-------------|
| 02 |             |             |             |
| C  | 1.63262700  | 2.79557200  | -2.02504100 |
| C  | 0.62706800  | 2.39594900  | -1.17041100 |
| C  | 0.74529600  | 2.52471800  | 0.21487700  |
| C  | 1.86947400  | 3.06651400  | 0.79929000  |
| C  | 2.89219500  | 3.48121700  | -0.05969500 |
| C  | 2.77864800  | 3.34722700  | -1.44062500 |
| H  | 1.52526400  | 2.69051400  | -3.09761200 |
| H  | 1.95077600  | 3.15253600  | 1.87564400  |
| H  | 3.79359400  | 3.90977500  | 0.36272700  |
| H  | 3.58880800  | 3.68087700  | -2.07841300 |
| O  | -0.37471500 | 2.02713500  | 0.82009100  |
| O  | -0.57970900 | 1.82669100  | -1.47880600 |
| C  | -3.28305500 | 0.73539000  | -1.15482800 |
| C  | -4.55357500 | 0.29156800  | -1.00804100 |
| C  | -5.15187000 | 0.21877800  | 0.28524600  |
| C  | -4.35253500 | 0.62844200  | 1.39381200  |
| C  | -3.08557700 | 1.06691100  | 1.20452500  |
| N  | -2.52109900 | 1.14629600  | -0.06497400 |
| H  | -2.78904100 | 0.80336100  | -2.11408300 |
| H  | -5.11371000 | -0.01077800 | -1.88340300 |
| H  | -4.75614100 | 0.59179400  | 2.39741800  |
| H  | -2.44483300 | 1.38734300  | 2.01410400  |
| B  | -1.12927600 | 1.49071400  | -0.23222500 |
| C  | -6.47180600 | -0.24718700 | 0.46170500  |
| N  | -7.55342400 | -0.63138900 | 0.60741700  |
| C  | 2.90578600  | 0.08148500  | 2.55597400  |
| C  | 1.91650400  | -0.33999600 | 1.68025300  |
| C  | 2.19778000  | -0.34982600 | 0.31930800  |
| C  | 3.41742200  | 0.06911900  | -0.18906200 |
| C  | 4.40537100  | 0.48060000  | 0.70238200  |
| C  | 4.14926300  | 0.48425800  | 2.06751000  |
| H  | 2.70956000  | 0.09955200  | 3.62178200  |
| H  | 0.93113200  | -0.63310700 | 2.02563000  |
| H  | 3.58538800  | 0.10312500  | -1.26054400 |
| H  | 5.36367300  | 0.81828700  | 0.32543400  |
| H  | 4.91712200  | 0.81318900  | 2.75843500  |
| S  | 0.90736500  | -0.85520100 | -0.82684400 |
| O  | -0.41121500 | -0.47229200 | -0.15265400 |
| C  | 1.00626500  | -2.63914600 | -0.56657900 |
| C  | 2.12165500  | -3.33537500 | -1.01757500 |
| C  | -0.06082500 | -3.27186000 | 0.05037000  |
| C  | 2.17001900  | -4.70979000 | -0.82887600 |
| H  | 2.94348800  | -2.81422600 | -1.49872100 |
| C  | 0.00092500  | -4.65157500 | 0.22981900  |
| H  | -0.91369900 | -2.68506300 | 0.37097300  |
| C  | 1.11026300  | -5.36614700 | -0.20602800 |
| H  | 3.03302200  | -5.26972700 | -1.16938500 |
| H  | -0.82382200 | -5.16558400 | 0.70934900  |
| H  | 1.15082600  | -6.43990700 | -0.06471700 |

#### S3

|    |             |             |             |
|----|-------------|-------------|-------------|
| 02 |             |             |             |
| C  | -1.07237900 | -3.38363000 | -1.57432800 |
| C  | -0.39963000 | -2.42278900 | -0.85180800 |
| C  | -0.48366200 | -2.36228300 | 0.54505500  |
| C  | -1.25338800 | -3.25703600 | 1.25488800  |
| C  | -1.94453900 | -4.23722700 | 0.52745700  |
| C  | -1.85567800 | -4.30041200 | -0.85684600 |

|            |             |             |             |                    |             |             |             |
|------------|-------------|-------------|-------------|--------------------|-------------|-------------|-------------|
| H          | -0.98997600 | -3.42140400 | -2.65418600 | H                  | 0.21073800  | 5.39682700  | 0.80287000  |
| H          | -1.31367800 | -3.19605900 | 2.33498700  | H                  | -2.09437700 | 6.29522400  | 0.88910100  |
| H          | -2.54850200 | -4.96351300 | 1.05932400  | <b>S4</b>          |             |             |             |
| H          | -2.38787800 | -5.07681700 | -1.39429800 | 0 2                |             |             |             |
| O          | 0.24475800  | -1.31994600 | 1.01885900  | C                  | -3.08115300 | -0.76231000 | -1.41805500 |
| O          | 0.36610900  | -1.40004500 | -1.31992100 | C                  | -2.23549000 | 0.05257500  | -0.69909400 |
| C          | 3.11887800  | -0.29869400 | -1.15648900 | C                  | -2.23545800 | 0.05363900  | 0.69906600  |
| C          | 4.44598700  | -0.03225200 | -1.08936200 | C                  | -3.08110300 | -0.76013200 | 1.41930900  |
| C          | 5.12248300  | -0.03815400 | 0.16857000  | C                  | -3.94559500 | -1.59276100 | 0.69541200  |
| C          | 4.33591000  | -0.35774200 | 1.31809800  | C                  | -3.94561800 | -1.59382800 | -0.69285000 |
| C          | 3.01084000  | -0.61799300 | 1.19540800  | H                  | -3.07532900 | -0.74725100 | -2.50111400 |
| N          | 2.36589200  | -0.59172200 | -0.02973500 | H                  | -3.07523300 | -0.74341500 | 2.50234200  |
| H          | 2.57619800  | -0.31974700 | -2.09257700 | H                  | -4.62659800 | -2.24263000 | 1.23218200  |
| H          | 4.99326700  | 0.17879000  | -1.99931700 | H                  | -4.62663900 | -2.24452600 | -1.22859300 |
| H          | 4.79699300  | -0.40046000 | 2.29659700  | O                  | -1.31302100 | 0.94289000  | 1.17663700  |
| H          | 2.38356100  | -0.87329100 | 2.03821000  | O                  | -1.31309300 | 0.94110900  | -1.17806600 |
| B          | 0.86968800  | -0.69637400 | -0.13537500 | C                  | 1.48111800  | 0.39177000  | -1.16024800 |
| C          | 6.49732600  | 0.25241000  | 0.26968000  | C                  | 2.74622400  | -0.16705100 | -1.20549700 |
| N          | 7.62685500  | 0.49468700  | 0.35347100  | C                  | 3.38740300  | -0.44758500 | 0.00028300  |
| C          | -3.32342200 | -0.36044800 | 1.92191700  | C                  | 2.74685800  | -0.16375400 | 1.20563400  |
| C          | -2.37541900 | 0.40184400  | 1.25996300  | C                  | 1.48173600  | 0.39494300  | 1.15951700  |
| C          | -2.23261600 | 0.22819700  | -0.11412100 | N                  | 0.87967900  | 0.66419000  | -0.00057500 |
| C          | -2.98547600 | -0.69407400 | -0.83091300 | H                  | 0.90783300  | 0.62485000  | -2.04912000 |
| C          | -3.93908300 | -1.44724900 | -0.15282600 | H                  | 3.22013500  | -0.38385100 | -2.15328500 |
| C          | -4.10244500 | -1.27825100 | 1.21528300  | H                  | 3.22126500  | -0.37795900 | 2.15376400  |
| H          | -3.45021400 | -0.24990700 | 2.99213900  | H                  | 0.90893500  | 0.63046300  | 2.04806100  |
| H          | -1.74372500 | 1.10469700  | 1.79155300  | B                  | -0.65690200 | 1.45346700  | -0.00112000 |
| H          | -2.81404100 | -0.83779200 | -1.89175200 | C                  | 4.70119500  | -1.03117500 | 0.00073700  |
| H          | -4.52382800 | -2.18354600 | -0.68963100 | N                  | 5.75112700  | -1.49717800 | 0.00110200  |
| H          | -4.83300900 | -1.87860400 | 1.74521900  | O                  | -0.38716300 | 2.84124000  | -0.00202000 |
| S          | -0.96000200 | 1.09462600  | -1.00955700 | <b>8</b>           |             |             |             |
| O          | 0.39570900  | 0.79478100  | -0.25050200 | 0 1                |             |             |             |
| C          | -1.23898300 | 2.77889800  | -0.45636400 | C                  | 3.59502000  | 0.05157500  | -0.67468000 |
| C          | -2.44782600 | 3.37595400  | -0.79996700 | C                  | 2.47878100  | -0.77472100 | -0.75237500 |
| C          | -0.24897700 | 3.45260500  | 0.24310800  | C                  | 1.38243400  | -0.54245700 | 0.07374000  |
| C          | -2.67228500 | 4.68970000  | -0.41483800 | C                  | 1.40425600  | 0.52513400  | 0.97127500  |
| H          | -3.20602300 | 2.82229200  | -1.34438200 | C                  | 2.51112700  | 1.35916900  | 1.02670600  |
| C          | -0.49265100 | 4.77141300  | 0.61959400  | C                  | 3.61200800  | 1.12215700  | 0.20888200  |
| H          | 0.68104200  | 2.95436300  | 0.48429900  | H                  | 4.44695000  | -0.13714500 | -1.31944300 |
| C          | -1.69510000 | 5.38589600  | 0.29367600  | H                  | 2.45482400  | -1.59673200 | -1.45972200 |
| H          | -3.60981600 | 5.16986100  | -0.66789600 | H                  | 0.55126100  | 0.70359900  | 1.61690600  |
| H          | 0.26665300  | 5.31523400  | 1.16860100  | H                  | 2.51905600  | 2.19244400  | 1.72158100  |
| H          | -1.87442600 | 6.41257200  | 0.59023500  | H                  | 4.47881200  | 1.77225700  | 0.26106500  |
| <b>TSC</b> |             |             |             | S                  | 0.00020700  | -1.67071000 | 0.00019200  |
| 0 2        |             |             |             | C                  | -1.38236700 | -0.54290900 | -0.07365300 |
| C          | -0.66326600 | -3.61300800 | -1.31465600 | C                  | -2.47747500 | -0.77346700 | 0.75456800  |
| C          | -0.17712100 | -2.47309100 | -0.71212900 | C                  | -1.40557200 | 0.52274500  | -0.97346200 |
| C          | -0.32174900 | -2.25497800 | 0.66493600  | C                  | -3.59388300 | 0.05266000  | 0.67674900  |
| C          | -0.96336100 | -3.16995700 | 1.47011200  | H                  | -2.45240700 | -1.59397200 | 1.46361800  |
| C          | -1.46519200 | -4.33081200 | 0.86381500  | C                  | -2.51256100 | 1.35660200  | -1.02905900 |
| C          | -1.31765900 | -4.54860900 | -0.49946400 | H                  | -0.55351900 | 0.69983000  | -1.62071600 |
| H          | -0.54402600 | -3.76691700 | -2.38079200 | C                  | -3.61221700 | 1.12127500  | -0.20909200 |
| H          | -1.07946900 | -2.98258200 | 2.53110500  | H                  | -4.44486600 | -0.13477100 | 1.32315200  |
| H          | -1.97048500 | -5.07117000 | 1.47359100  | H                  | -2.52157900 | 2.18837800  | -1.72571400 |
| H          | -1.70580100 | -5.45845000 | -0.94299300 | H                  | -4.47914100 | 1.77120700  | -0.26140400 |
| O          | 0.20633600  | -1.05563500 | 1.01373000  | <b>[BO]</b>        |             |             |             |
| O          | 0.42860000  | -1.40738500 | -1.29727700 | 0 2                |             |             |             |
| C          | 3.12527000  | -0.29476900 | -1.15343900 | C                  | -1.28329300 | 1.44706600  | 0.00009000  |
| C          | 4.46539800  | -0.02815400 | -1.07564900 | C                  | -0.08172800 | 0.72062000  | 0.00012900  |
| C          | 5.06021100  | 0.17532800  | 0.18660900  | C                  | -0.08172500 | -0.72061700 | 0.00012400  |
| C          | 4.24110500  | 0.07037700  | 1.32987700  | C                  | -1.28329200 | -1.44706800 | 0.00001700  |
| C          | 2.90731100  | -0.20217900 | 1.18169800  | C                  | -2.44477800 | -0.71476200 | -0.00010900 |
| N          | 2.34214500  | -0.36754200 | -0.04325900 | C                  | -2.44477900 | 0.71475400  | -0.00011400 |
| H          | 2.61406000  | -0.46973300 | -2.09070900 | H                  | -1.26968600 | 2.52896700  | 0.00007700  |
| H          | 5.06071200  | 0.01540300  | -1.97811300 | H                  | -1.26967400 | -2.52896900 | 0.00009300  |
| H          | 4.66004600  | 0.19160300  | 2.32004500  | H                  | -3.39898100 | -1.22771900 | -0.00020700 |
| H          | 2.22959000  | -0.30866500 | 2.01767800  | H                  | -3.39898100 | 1.22771100  | -0.00022000 |
| B          | 0.78186200  | -0.48409500 | -0.20626800 | O                  | 1.13357800  | -1.16481100 | 0.00011100  |
| C          | 6.44847500  | 0.46402400  | 0.30383100  | O                  | 1.13357800  | 1.16482000  | 0.00012400  |
| N          | 7.57340100  | 0.70002400  | 0.39918500  | B                  | 2.07744300  | 0.00002100  | -0.00003200 |
| C          | -3.43978100 | -0.59606200 | 1.65612900  | O                  | 3.31630400  | -0.00001500 | -0.00022600 |
| C          | -2.59123300 | 0.29644900  | 1.02304200  | <b>Bcat-O-Bcat</b> |             |             |             |
| C          | -2.32406300 | 0.12366500  | -0.34055100 | 0 1                |             |             |             |
| C          | -2.85683300 | -0.96159600 | -1.04637700 | C                  | 4.76299000  | -0.88891200 | 0.00032300  |
| C          | -3.69947600 | -1.84866800 | -0.39364500 | C                  | 3.40237100  | -0.67610300 | 0.00015200  |
| C          | -3.99701600 | -1.66432300 | 0.95299600  | C                  | 2.85620900  | 0.60395300  | -0.00019300 |
| H          | -3.65370600 | -0.47053900 | 2.71124700  | C                  | 3.64297100  | 1.73408700  | -0.00037800 |
| H          | -2.12545000 | 1.10762200  | 1.56973100  | C                  | 5.02645700  | 1.53147600  | -0.00019900 |
| H          | -2.59989600 | -1.10803000 | -2.08973700 | C                  | 5.57327000  | 0.25054600  | 0.00014200  |
| H          | -4.10283100 | -2.69723700 | -0.93249600 | H                  | 5.17353500  | -1.89056700 | 0.00058400  |
| H          | -4.64566300 | -2.36685800 | 1.46299000  | H                  | 3.20286300  | 2.72307100  | -0.00064500 |
| S          | -1.18828100 | 1.13734900  | -1.20336800 | H                  | 5.68538000  | 2.39136300  | -0.00032400 |
| O          | 0.42335600  | 0.89121800  | -0.48001600 | H                  | 6.65008000  | 0.13181600  | 0.00027400  |
| C          | -1.45466400 | 2.74719700  | -0.46197600 | O                  | 1.48474700  | 0.50734400  | -0.00030500 |
| C          | -2.75752000 | 3.24219700  | -0.42841200 | O                  | 2.38603500  | -1.59990000 | 0.00026800  |
| C          | -0.37812600 | 3.51171800  | -0.02802000 | B                  | 1.22612300  | -0.85037500 | -0.00002700 |
| C          | -2.98265000 | 4.51885000  | 0.06632900  | O                  | 0.00000500  | -1.42340600 | -0.00005200 |
| H          | -3.58440100 | 2.63039700  | -0.77130600 | C                  | -4.76299100 | -0.88891300 | -0.00028000 |
| C          | -0.62121400 | 4.79395200  | 0.45814300  |                    |             |             |             |
| H          | 0.62046200  | 3.09919100  | -0.05695000 |                    |             |             |             |
| C          | -1.91480300 | 5.29696100  | 0.50726800  |                    |             |             |             |
| H          | -3.99370900 | 4.90679400  | 0.10418800  |                    |             |             |             |

|   |             |             |             |
|---|-------------|-------------|-------------|
| C | -3.40237700 | -0.67609700 | -0.00013100 |
| C | -2.85620400 | 0.60395400  | 0.00018500  |
| C | -3.64297000 | 1.73408500  | 0.00036500  |
| C | -5.02645800 | 1.53147400  | 0.00021500  |
| C | -5.57327300 | 0.25054600  | -0.00010000 |
| H | -5.17353400 | -1.89056900 | -0.00052000 |
| H | -3.20286700 | 2.72307100  | 0.00060600  |
| H | -5.68537600 | 2.39136300  | 0.00034700  |
| H | -6.65008300 | 0.13181600  | -0.00020900 |
| O | -1.48475000 | 0.50734300  | 0.00027600  |
| O | -2.38602800 | -1.59990500 | -0.00025100 |
| B | -1.22613000 | -0.85037400 | -0.00001400 |

|   |             |             |             |
|---|-------------|-------------|-------------|
| H | -1.95205000 | -3.31274800 | 2.86650900  |
| H | -3.98341500 | -4.16226900 | 1.67439700  |
| H | -4.22030500 | -3.86992500 | -0.75953900 |
| O | 0.07448800  | -2.01669400 | 1.47799800  |
| O | -0.18038300 | -1.68253300 | -0.82179700 |
| C | -4.23505800 | -0.23015000 | 0.38324400  |
| C | -2.92425100 | 0.21050700  | 0.48859300  |
| C | -2.26516100 | 0.60390400  | -0.67029800 |
| C | -2.86007600 | 0.54970800  | -1.92140900 |
| C | -4.18283200 | 0.12303200  | -2.00842700 |
| C | -4.86277900 | -0.26581800 | -0.86057400 |
| H | -4.75901000 | -0.56844500 | 1.26884200  |
| H | -2.40024700 | 0.21482100  | 1.43792700  |
| H | -2.29844500 | 0.81025600  | -2.81243800 |
| H | -4.66947800 | 0.07214700  | -2.97527600 |
| H | -5.88413000 | -0.62086900 | -0.93586100 |
| S | -0.53984600 | 1.07113900  | -0.56558300 |
| O | -0.01161600 | 0.28016300  | 0.67260600  |
| C | -0.70164400 | 2.71622300  | 0.13937500  |
| C | -1.26430100 | 3.71254000  | -0.65099500 |
| C | -0.23990400 | 2.96328200  | 1.42280600  |
| C | -1.37673300 | 4.99360200  | -0.12960600 |
| H | -1.61922200 | 3.49209000  | -1.65276900 |
| C | -0.35795100 | 4.25496800  | 1.92952100  |
| H | 0.19935900  | 2.15926100  | 1.99905700  |
| C | -0.92342000 | 5.26381200  | 1.15959600  |
| H | -1.81676400 | 5.78109100  | -0.72972500 |
| H | -0.00345700 | 4.46824100  | 2.93101100  |
| H | -1.01064400 | 6.26630100  | 1.56189500  |

### Cartesian coordinates in Firgure 4

#### TSB-1

|     |             |             |             |
|-----|-------------|-------------|-------------|
| O 1 |             |             |             |
| C   | 5.69029600  | -0.34751500 | -1.13918100 |
| C   | 4.47873300  | -0.59742900 | -0.52906900 |
| C   | 4.30620900  | -0.46817800 | 0.84488300  |
| C   | 5.33715800  | -0.08312200 | 1.67656000  |
| C   | 6.56943100  | 0.17389400  | 1.07004400  |
| C   | 6.74206400  | 0.04479100  | -0.30723600 |
| H   | 5.80962500  | -0.45395800 | -2.21004300 |
| H   | 5.18882200  | 0.01008400  | 2.74508200  |
| H   | 7.40809000  | 0.47861500  | 1.68488500  |
| H   | 7.71235200  | 0.25124500  | -0.74324200 |
| O   | 3.01247500  | -0.77990400 | 1.16107600  |
| O   | 3.29548700  | -0.99266700 | -1.08968900 |
| B   | 2.38753000  | -1.09857600 | -0.04109900 |
| B   | 0.75748900  | -1.48951000 | -0.20524000 |
| C   | -2.06128800 | -2.78857100 | -1.97050400 |
| C   | -1.03979300 | -2.39997700 | -1.12746000 |
| C   | -1.14830100 | -2.51633000 | 0.26026100  |
| C   | -2.28186100 | -3.03039100 | 0.85542700  |
| C   | -3.32107500 | -3.43027400 | 0.00876300  |
| C   | -3.21533200 | -3.31089100 | -1.37442200 |
| H   | -1.95921200 | -2.69511700 | -3.04497700 |
| H   | -2.35589100 | -3.10755300 | 1.93327100  |
| H   | -4.22799700 | -3.83705800 | 0.44161100  |
| H   | -4.03704500 | -3.63364400 | -2.00347700 |
| O   | -0.01880700 | -2.03856700 | 0.84764100  |
| O   | 0.16813400  | -1.85459100 | -1.44542700 |
| C   | -3.17494400 | 0.05296400  | 2.52811400  |
| C   | -2.14883100 | 0.41381000  | 1.66793900  |
| C   | -2.40221000 | 0.41079900  | 0.30169800  |
| C   | -3.62654100 | 0.03341500  | -0.22752200 |
| C   | -4.65004800 | -0.31726300 | 0.64892300  |
| C   | -4.42408100 | -0.30335000 | 2.01931900  |
| H   | -3.00075700 | 0.04161800  | 3.59776300  |
| H   | -1.15634300 | 0.65854900  | 2.02960200  |
| H   | -3.77029100 | -0.02083000 | -1.30153400 |
| H   | -5.61161600 | -0.62637500 | 0.25637100  |
| H   | -5.21947600 | -0.58809700 | 2.69865200  |
| S   | -1.07106100 | 0.83814400  | -0.82795000 |
| O   | 0.21690400  | 0.40954600  | -0.10484400 |
| C   | -1.08607600 | 2.62715900  | -0.59688800 |
| C   | -2.13506400 | 3.36714800  | -1.13005100 |
| C   | -0.03439200 | 3.21972200  | 0.08330400  |
| C   | -2.13179900 | 4.74512700  | -0.96172100 |
| H   | -2.94535600 | 2.87679600  | -1.66048700 |
| C   | -0.04333400 | 4.60323500  | 0.24073700  |
| H   | 0.76672100  | 2.60039900  | 0.46897900  |
| C   | -1.08644600 | 5.36156200  | -0.27741200 |
| H   | -2.94286400 | 5.33858800  | -1.36696200 |
| H   | 0.77059600  | 5.08619600  | 0.76863100  |
| H   | -1.08588300 | 6.43812800  | -0.15232700 |

#### TSB-1

|     |             |             |             |
|-----|-------------|-------------|-------------|
| O 1 |             |             |             |
| C   | 5.31306300  | -1.74633500 | -1.07270900 |
| C   | 4.08751300  | -1.34875400 | -0.58138100 |
| C   | 3.97196200  | -0.57214500 | 0.56771900  |
| C   | 5.07641700  | -0.15689900 | 1.28146000  |
| C   | 6.32418000  | -0.55154000 | 0.79172300  |
| C   | 6.43979600  | -1.32866000 | -0.35960200 |
| H   | 5.38680100  | -2.35194200 | -1.96709900 |
| H   | 4.97149900  | 0.44402000  | 2.17602400  |
| H   | 7.21988000  | -0.24733000 | 1.32021300  |
| H   | 7.42375200  | -1.61729100 | -0.70970100 |
| O   | 2.64564000  | -0.33843400 | 0.81493100  |
| O   | 2.83586000  | -1.61286900 | -1.07032700 |
| B   | 1.95325400  | -0.99267200 | -0.20064800 |
| B   | 0.17351100  | -1.02314700 | -0.26157700 |
| C   | -2.47569100 | -3.46516100 | -0.34364800 |
| C   | -1.53022600 | -2.48180500 | -0.12993400 |
| C   | -1.54400800 | -1.69402600 | 1.03014600  |
| C   | -2.51073800 | -1.85827200 | 1.99976700  |
| C   | -3.48385400 | -2.84060500 | 1.77979600  |
| C   | -3.46459200 | -3.62974600 | 0.63362900  |
| H   | -2.44689600 | -4.07227800 | -1.24069300 |
| H   | -2.51269800 | -1.23686100 | 2.88730700  |
| H   | -4.25873300 | -2.99500200 | 2.52209300  |
| H   | -4.22348900 | -4.39176200 | 0.49660600  |
| O   | -0.52456900 | -0.80637300 | 0.99869400  |
| O   | -0.51729200 | -2.10217400 | -0.93854100 |
| C   | -4.13763400 | 0.92291800  | 0.70362900  |
| C   | -2.91487800 | 1.40699600  | 0.26235200  |
| C   | -2.34865900 | 0.85923400  | -0.88926300 |
| C   | -2.99026200 | -0.16438300 | -1.58569000 |
| C   | -4.20942000 | -0.64328900 | -1.12264100 |
| C   | -4.78635100 | -0.10100500 | 0.01801900  |
| H   | -4.58035600 | 1.34256700  | 1.59956800  |
| H   | -2.41009800 | 2.19362500  | 0.80841900  |
| H   | -2.52429600 | -0.60593600 | -2.46031900 |
| H   | -4.69364500 | -1.45820900 | -1.64665300 |
| H   | -5.73044000 | -0.48693200 | 0.38340700  |
| S   | -0.79707900 | 1.40481600  | -1.56942300 |
| O   | 0.52611300  | 0.15140500  | -0.99875400 |
| C   | -0.31981500 | 2.73338100  | -0.48449800 |
| C   | -0.57626600 | 4.03485400  | -0.90684100 |
| C   | 0.28973400  | 2.46795900  | 0.73971600  |
| C   | -0.22464300 | 5.09549700  | -0.07976600 |
| H   | -1.04396200 | 4.21547800  | -1.86807100 |
| C   | 0.63352700  | 3.54021500  | 1.55426200  |
| H   | 0.48510700  | 1.44723300  | 1.04372900  |
| C   | 0.37823500  | 4.84709200  | 1.14857300  |
| H   | -0.41784000 | 6.11271300  | -0.39901600 |
| H   | 1.10900300  | 3.34883400  | 2.50889200  |
| H   | 0.65549200  | 5.67555500  | 1.79022700  |

#### S3-1

|     |             |             |             |
|-----|-------------|-------------|-------------|
| O 1 |             |             |             |
| C   | 5.06436500  | 0.89335800  | -0.95464300 |
| C   | 4.10920500  | 0.02214800  | -0.47404100 |
| C   | 4.44790400  | -1.20696000 | 0.08177200  |
| C   | 5.75841800  | -1.62430900 | 0.18476200  |
| C   | 6.73535500  | -0.75038700 | -0.29917100 |
| C   | 6.39608000  | 0.48116600  | -0.85664600 |
| H   | 4.78679400  | 1.84739300  | -1.38522000 |
| H   | 6.00628000  | -2.58410700 | 0.62022300  |
| H   | 7.77839300  | -1.03789500 | -0.23943300 |
| H   | 7.18006300  | 1.13371500  | -1.22238800 |
| O   | 3.30581200  | -1.85161700 | 0.46943200  |
| O   | 2.74865100  | 0.16224500  | -0.43757900 |
| B   | 2.24909500  | -1.00876600 | 0.14691000  |
| B   | 0.58224400  | -1.26237200 | 0.36146300  |
| C   | -2.34675200 | -2.84330600 | -1.00617600 |
| C   | -1.24238700 | -2.37405000 | -0.32782300 |
| C   | -1.09832000 | -2.54888000 | 1.05397100  |
| C   | -2.07278200 | -3.18327200 | 1.79762200  |
| C   | -3.20449000 | -3.65386900 | 1.11731100  |
| C   | -3.33727200 | -3.49142600 | -0.25690000 |
| H   | -2.43980000 | -2.69906600 | -2.07619600 |

## NMR spectra

### Aromatic pinacol 4a

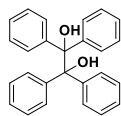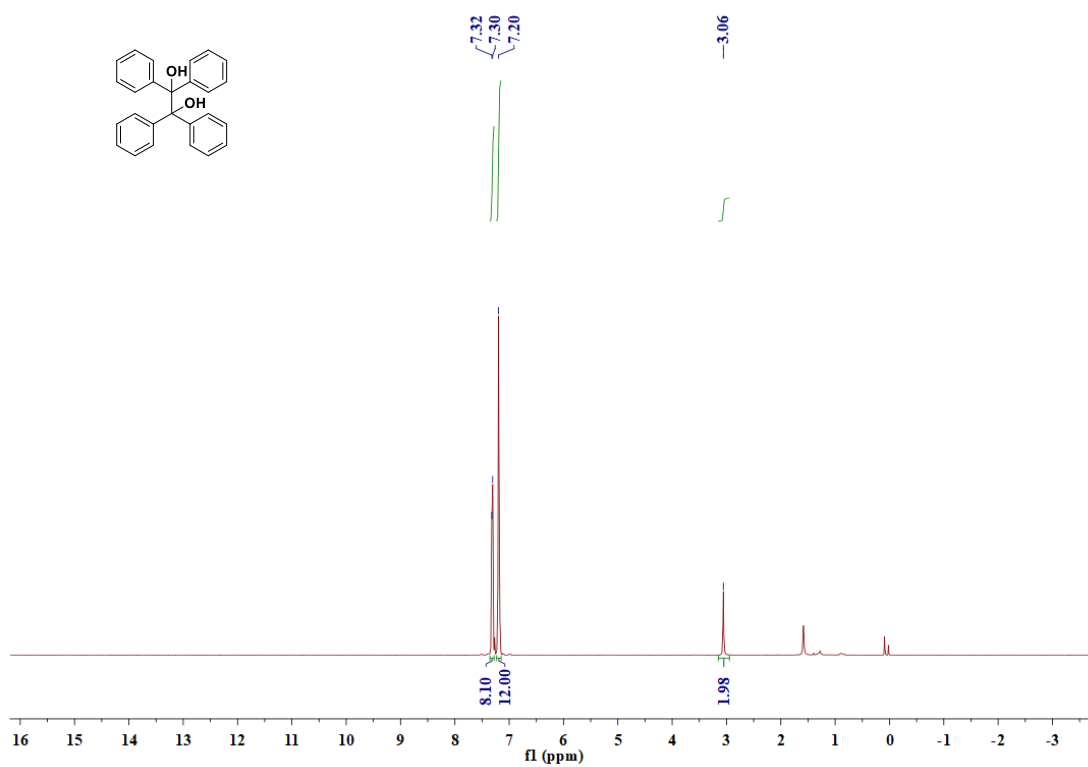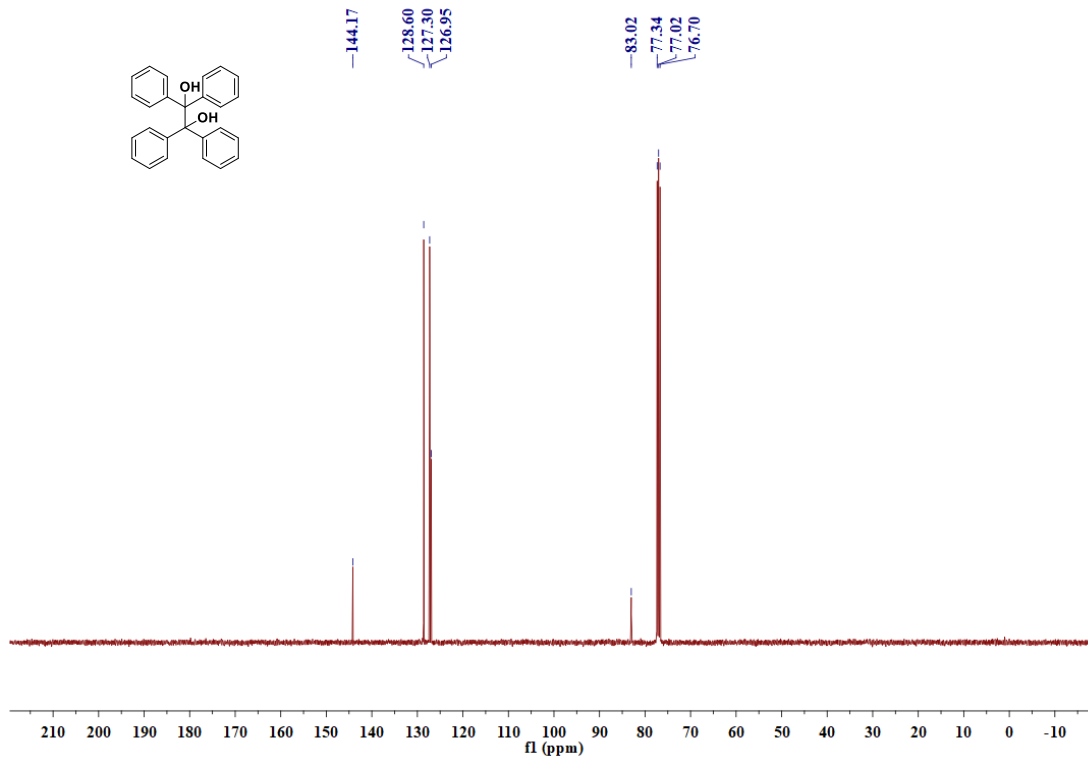



# Aromatic pinacol 4b

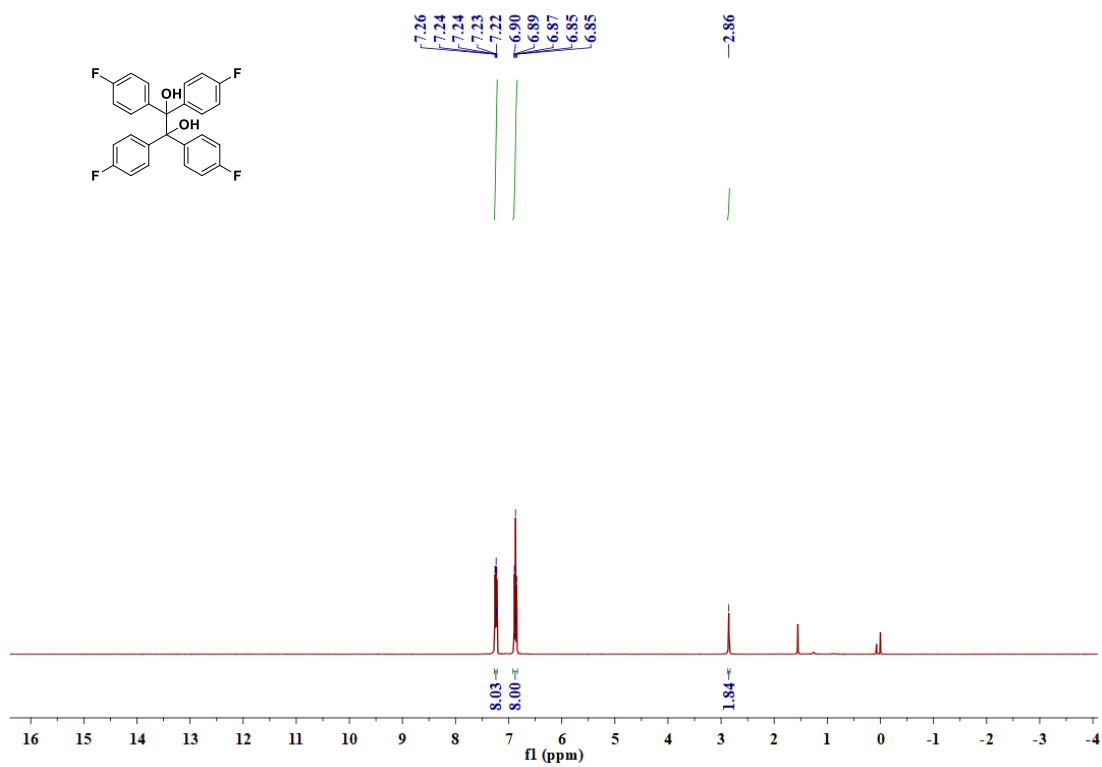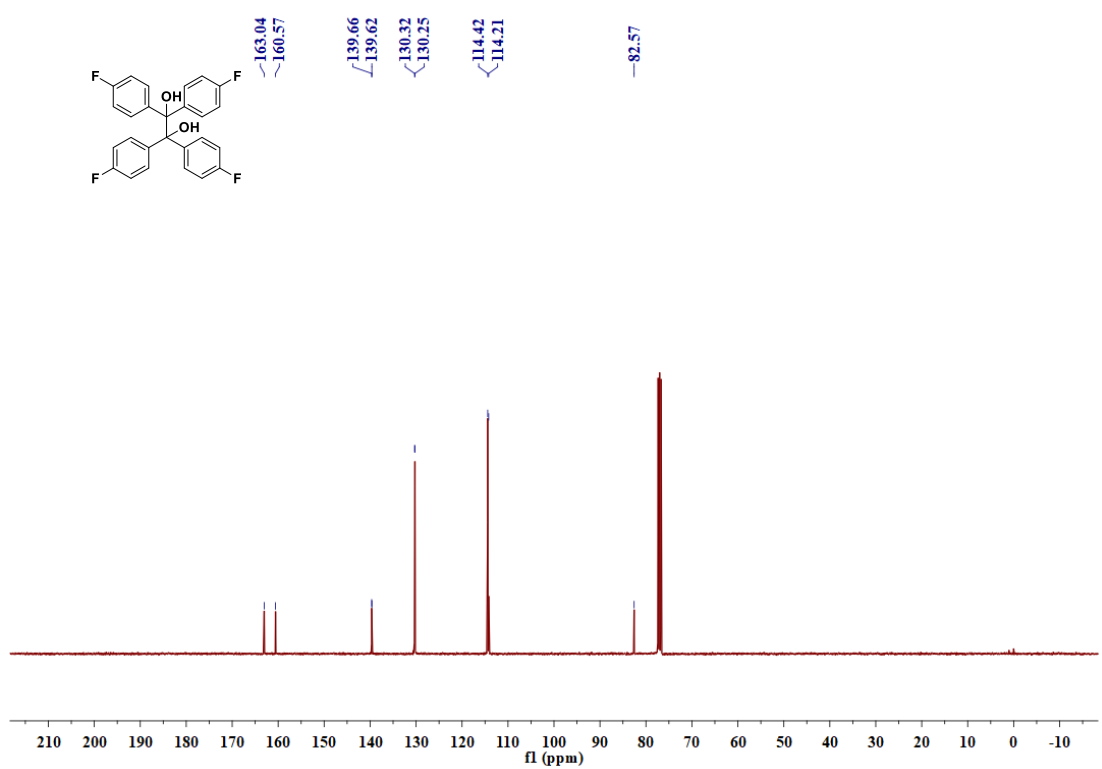

# Aromatic pinacol 4c

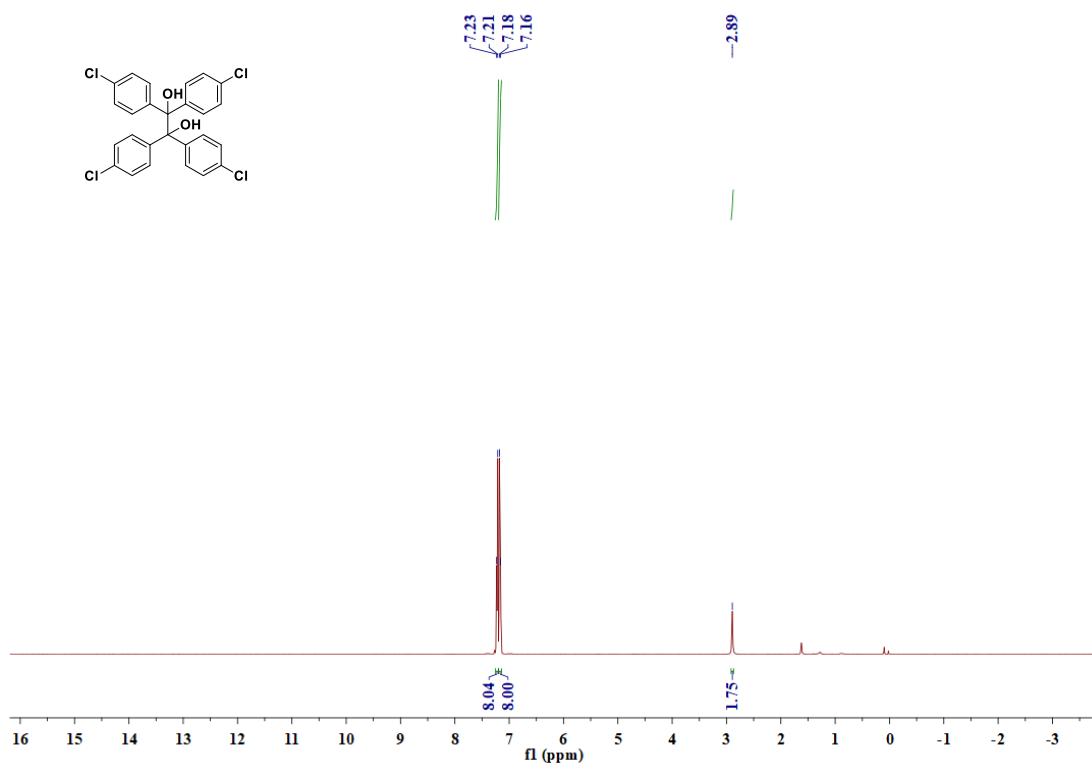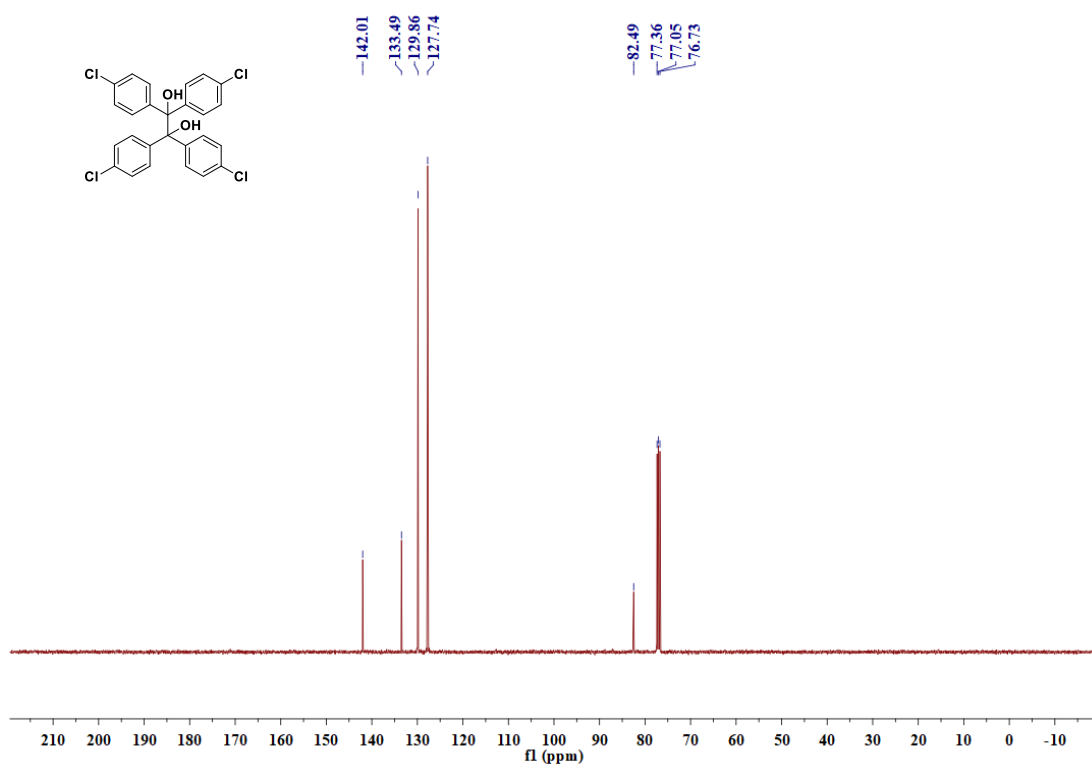

# Aromatic pinacol 4d

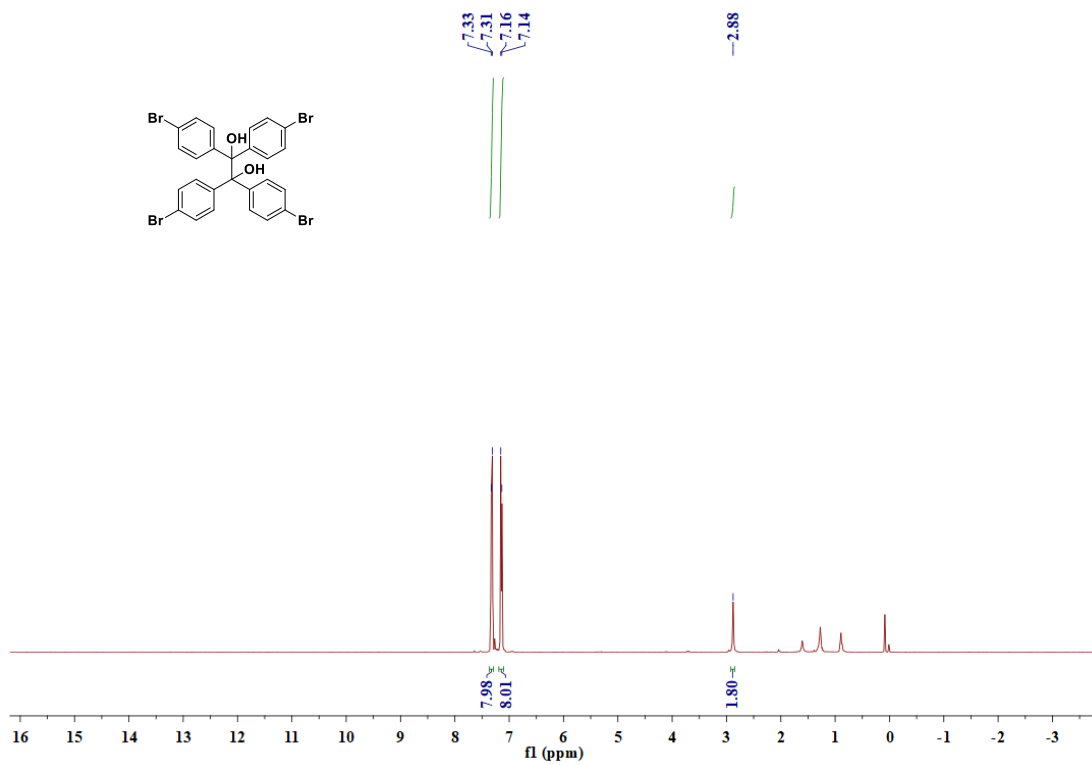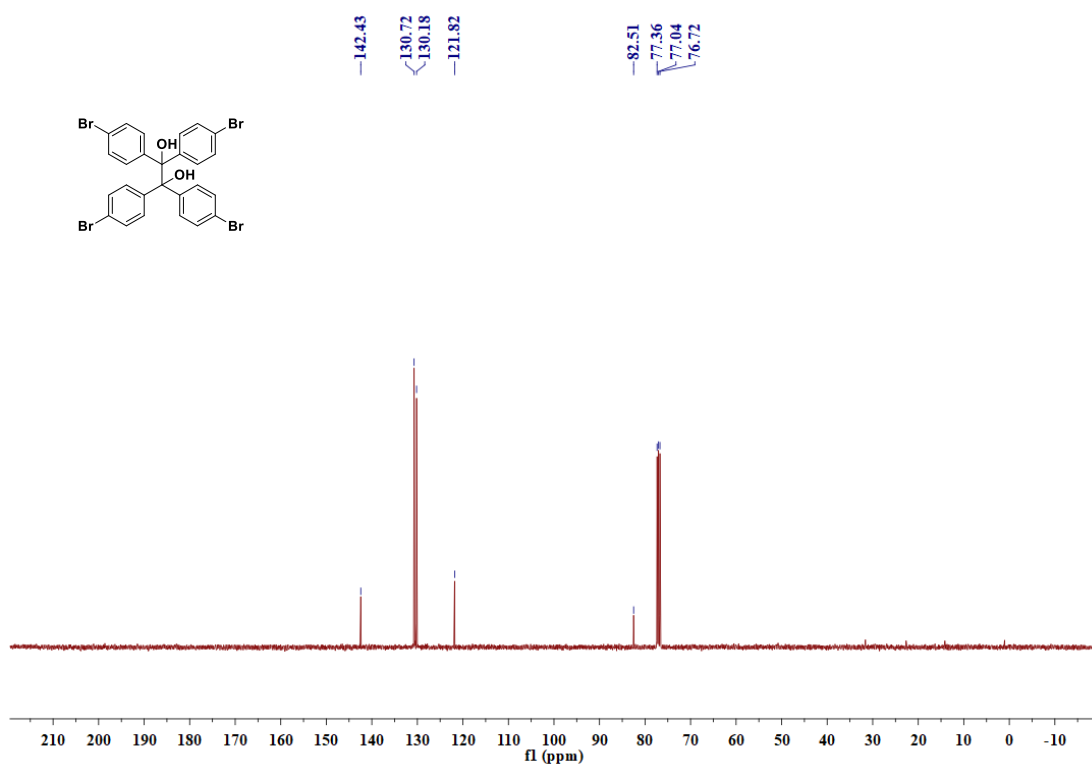

Arylamine 4e

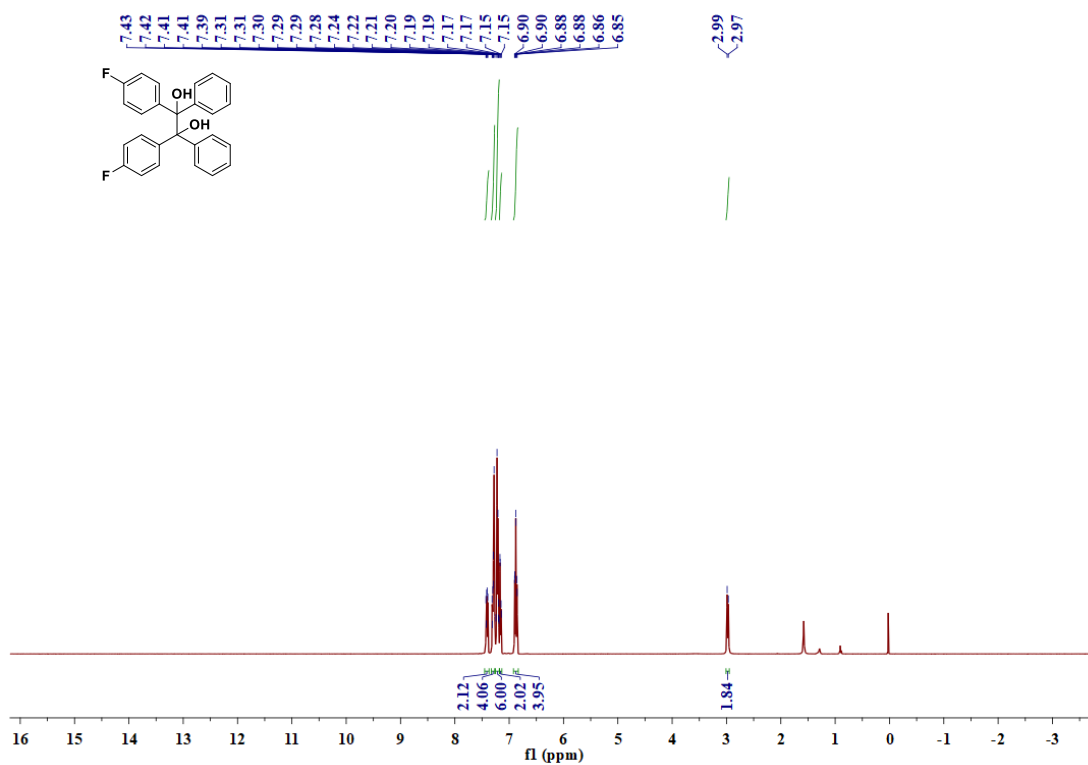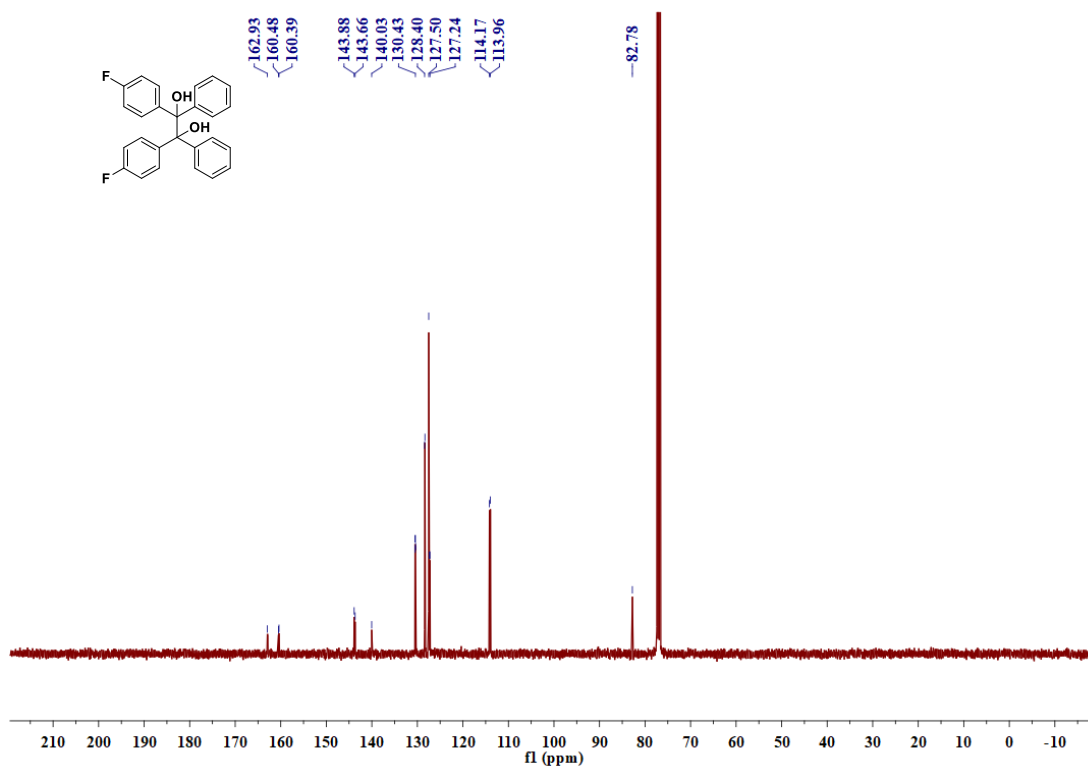

# Aromatic pinacol 4f

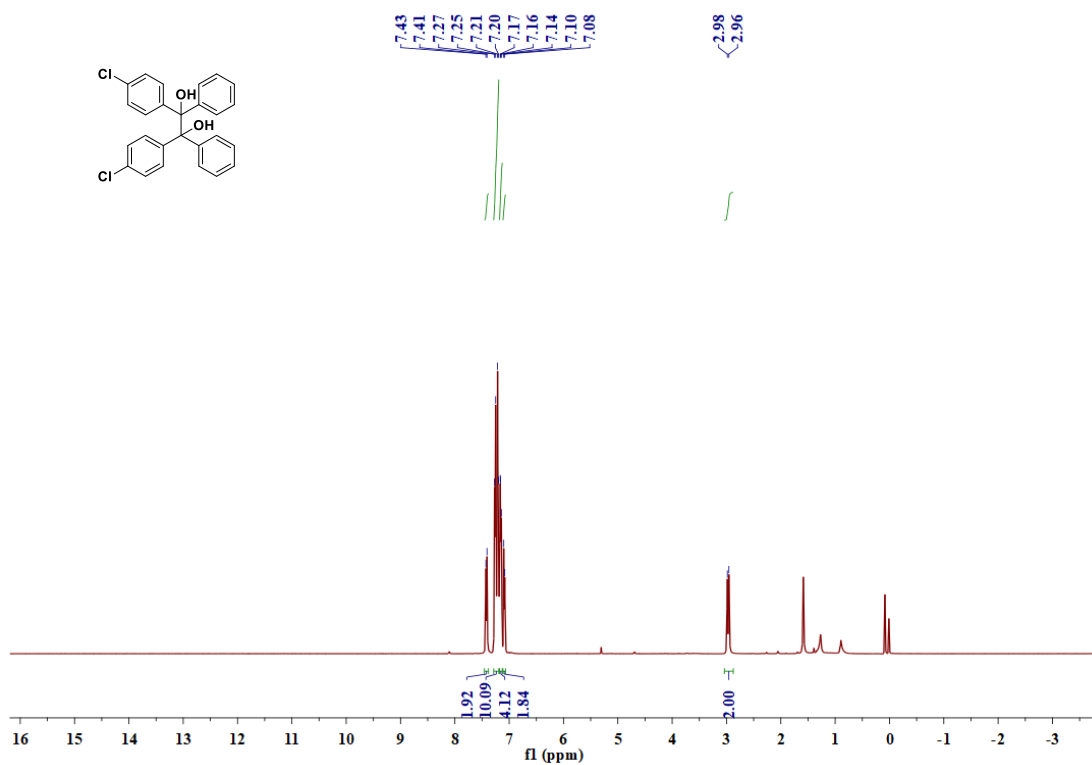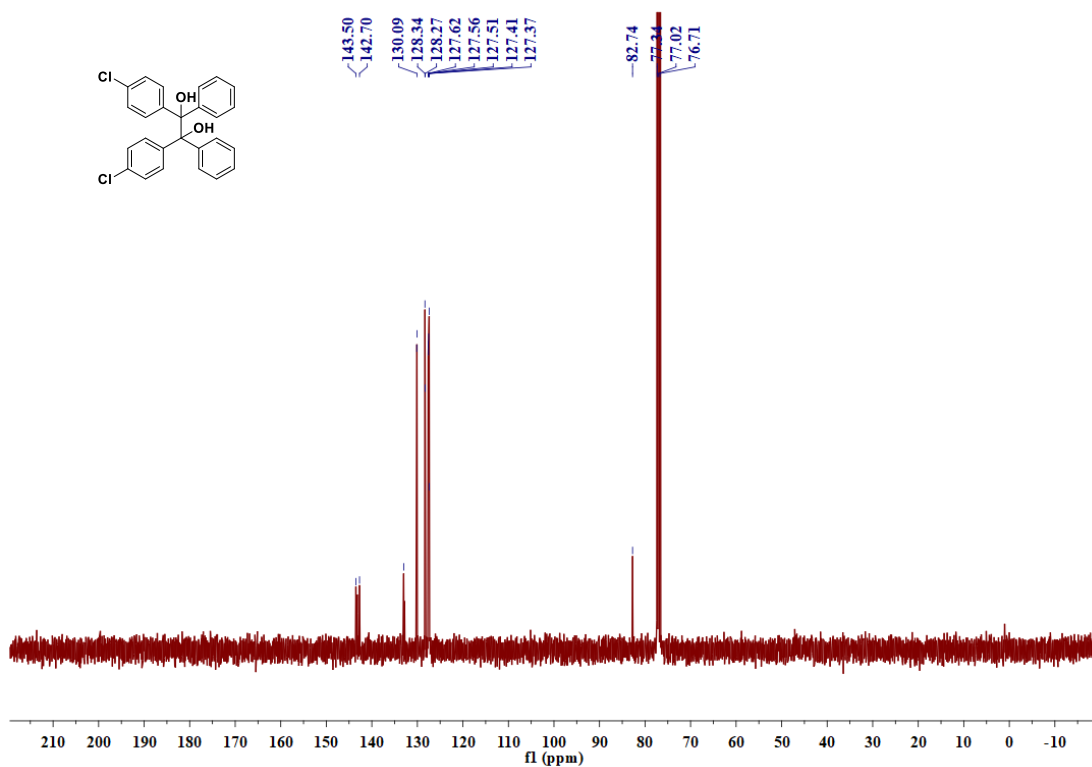

Aromatic pinacol 4g

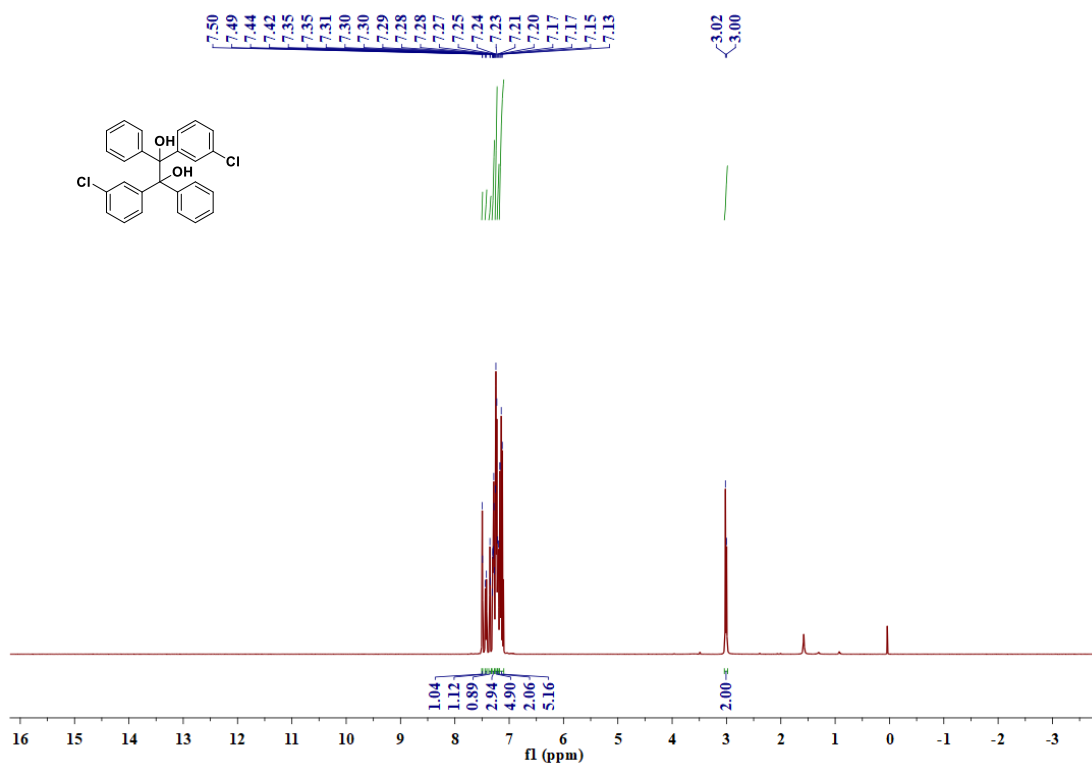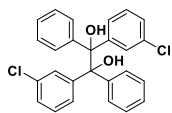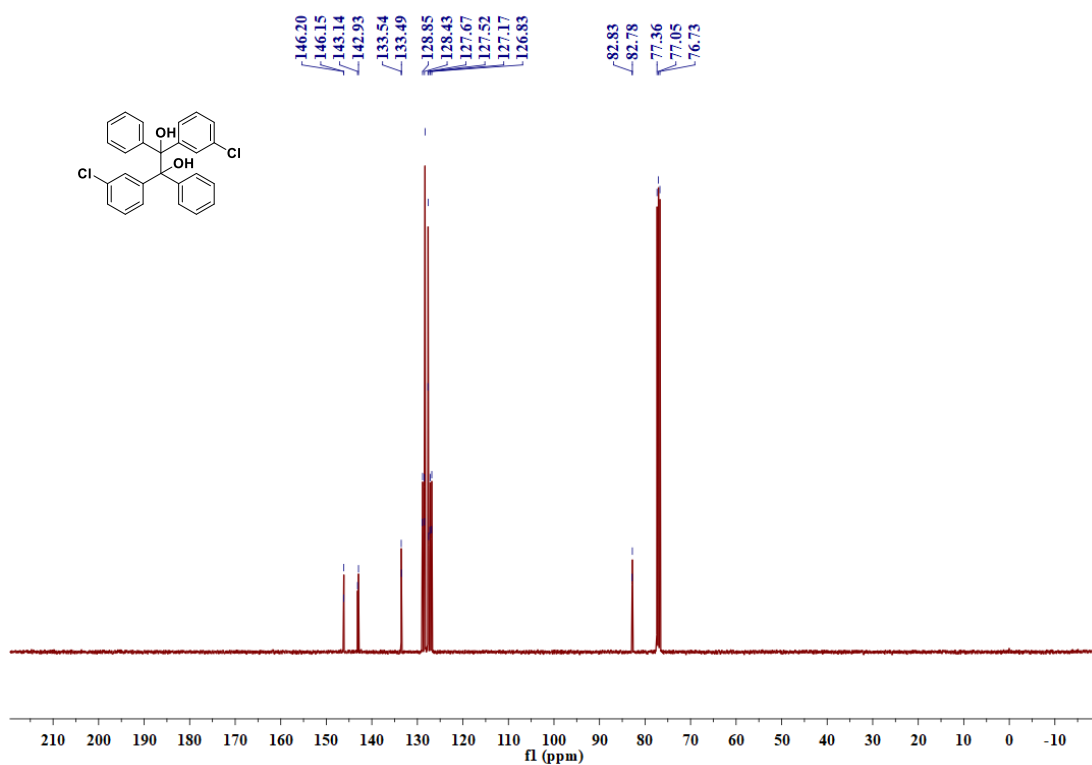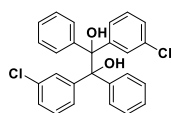

Aromatic ketone 4h

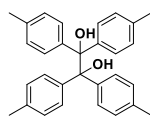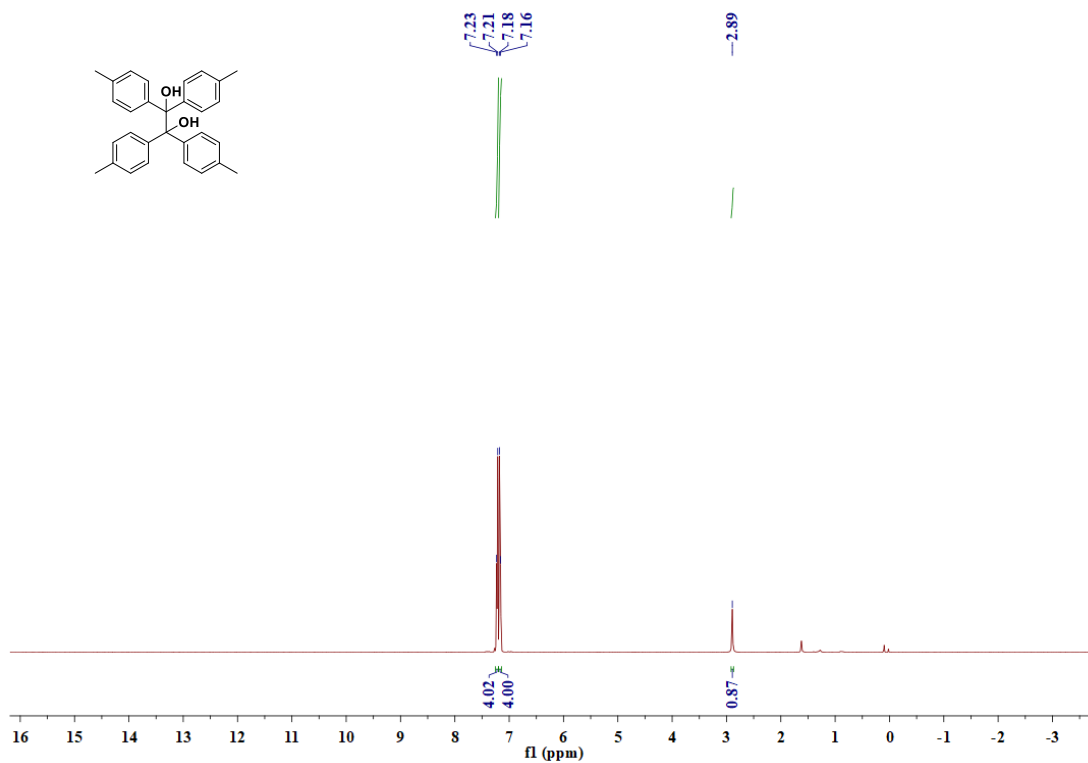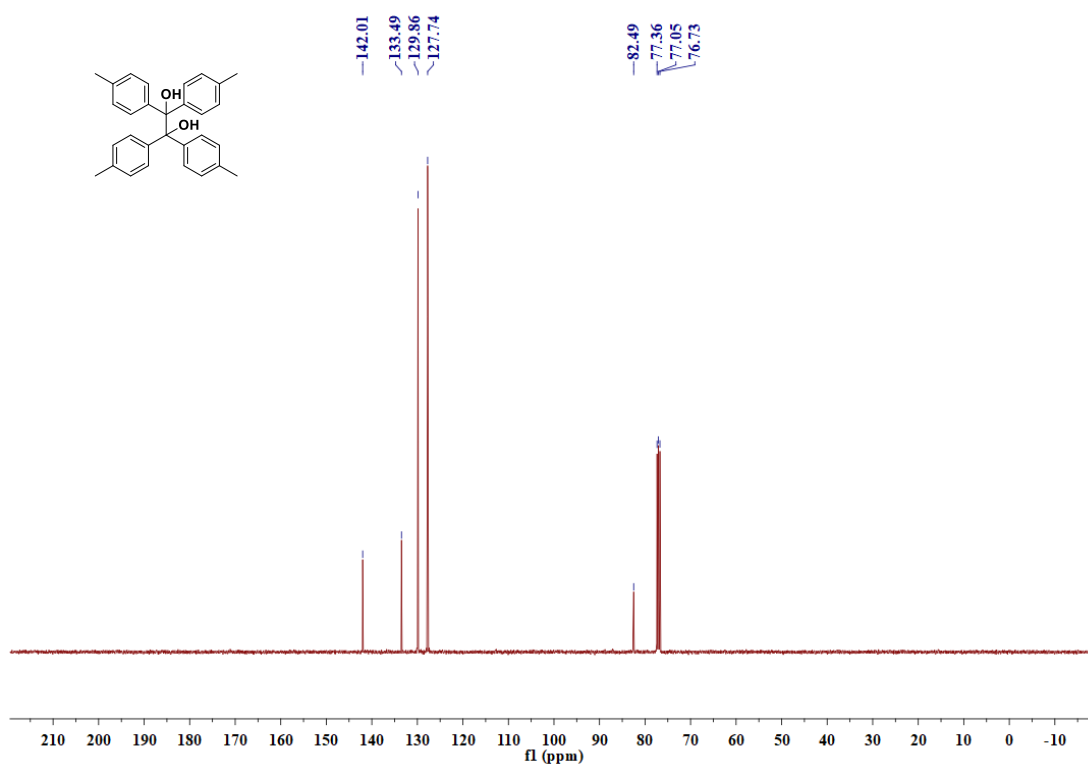

Aromatic pinacol 4i

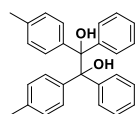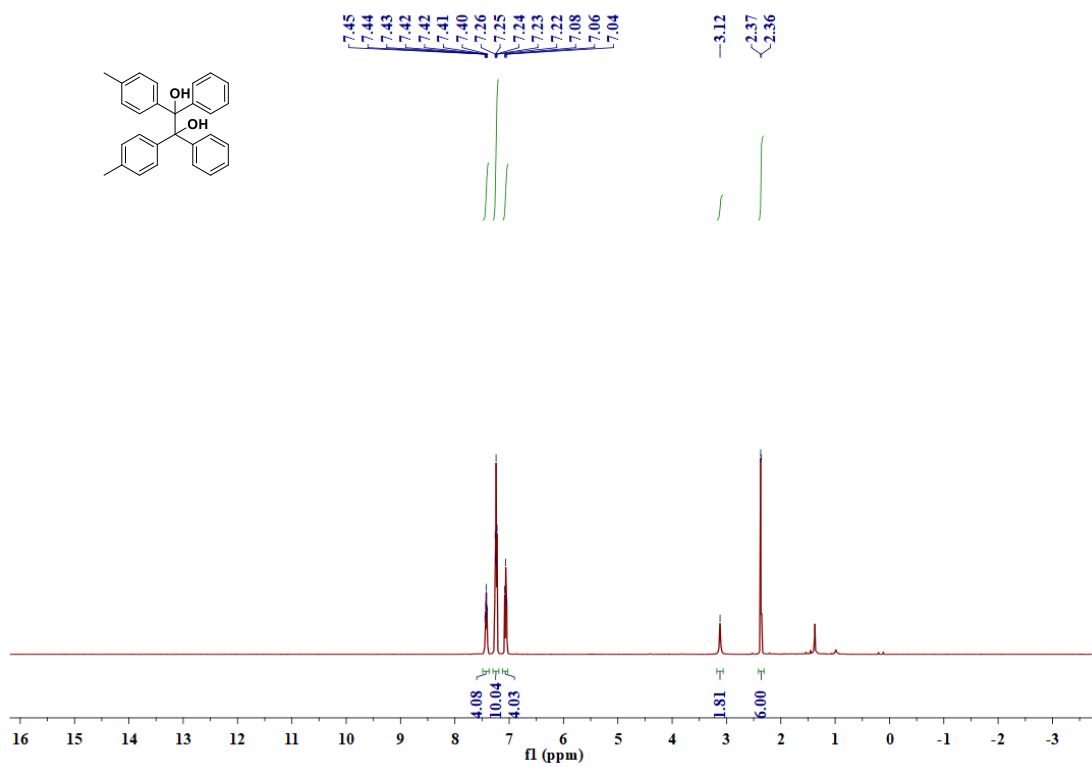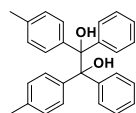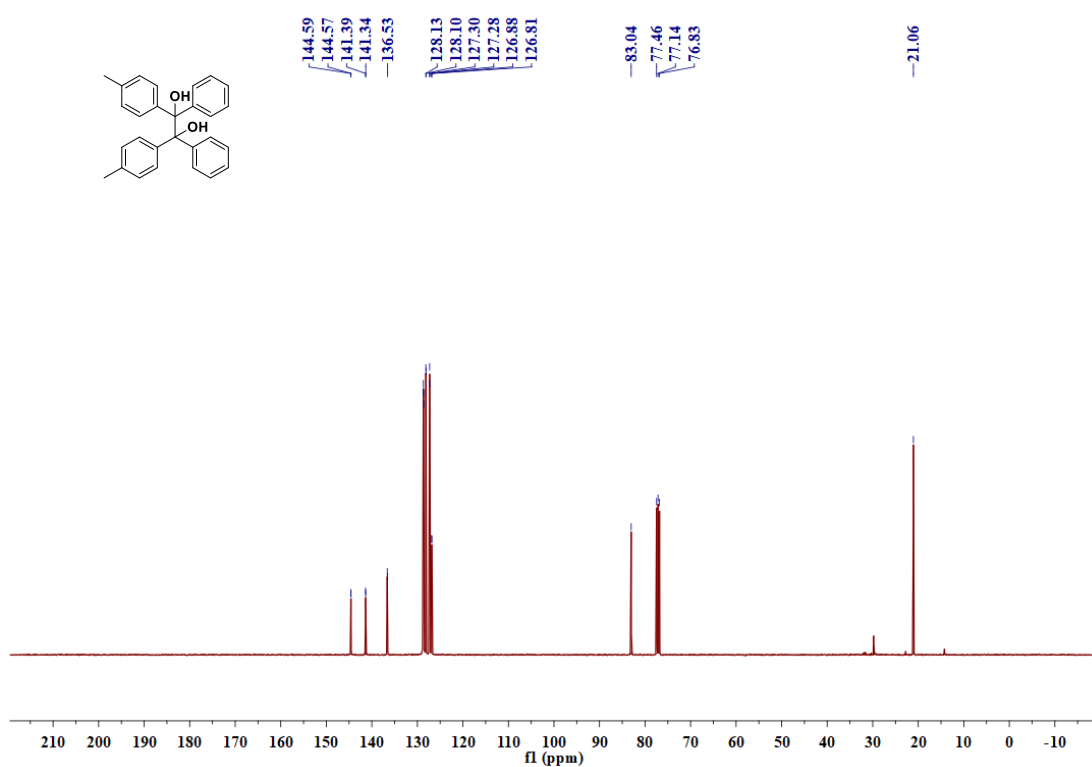



Aromatic pinacol 4j

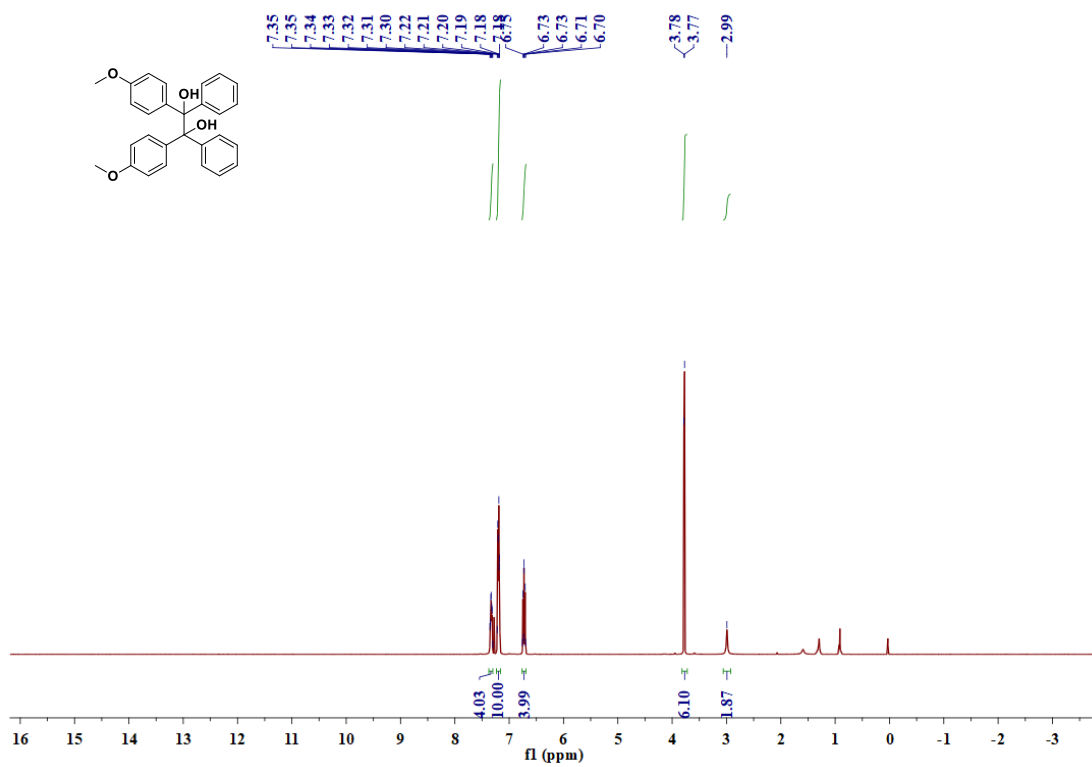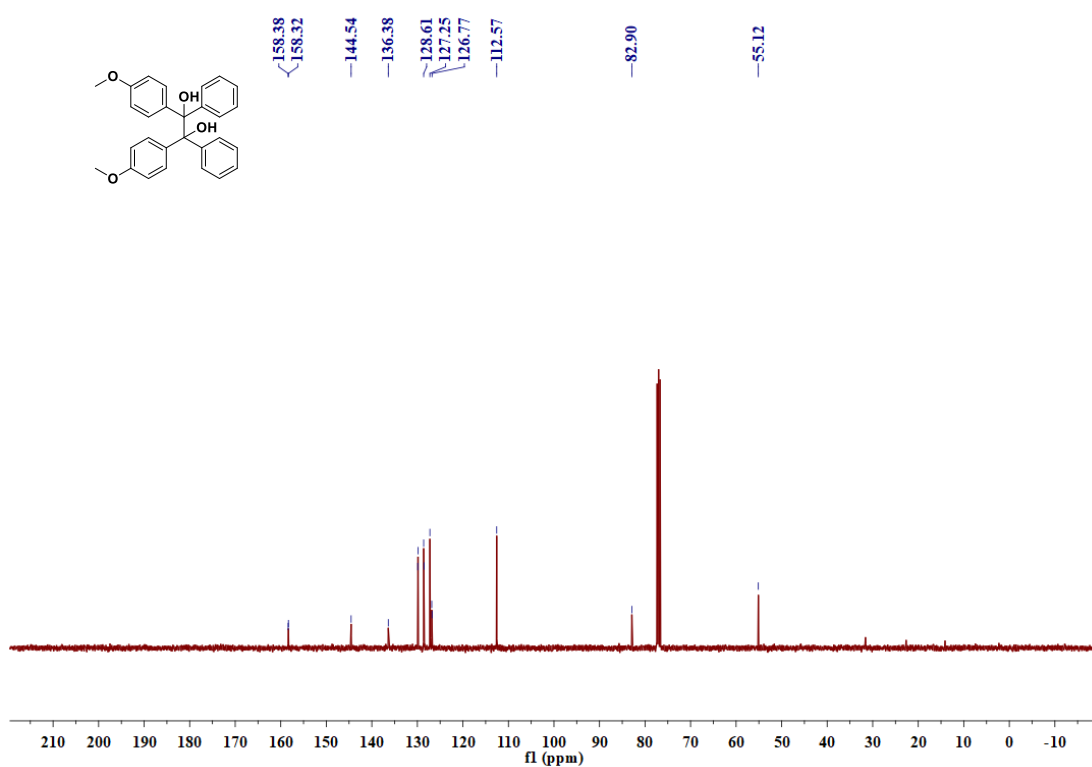

# Aromatic pinacol 4k

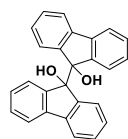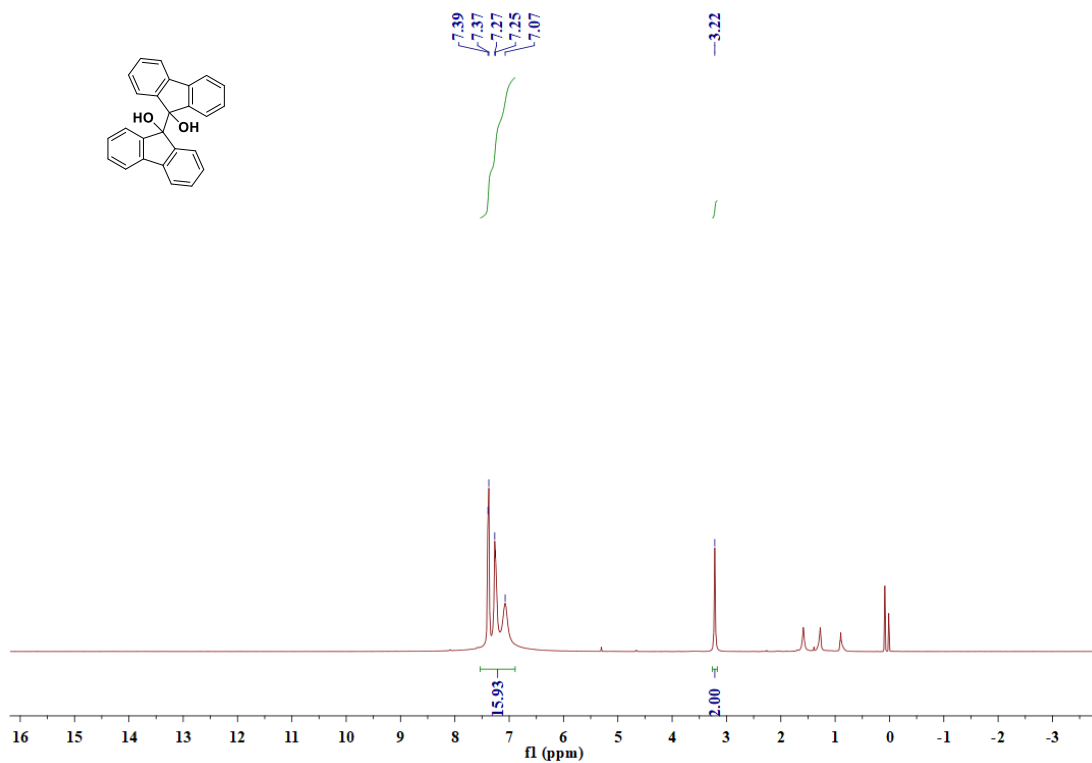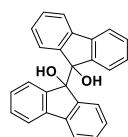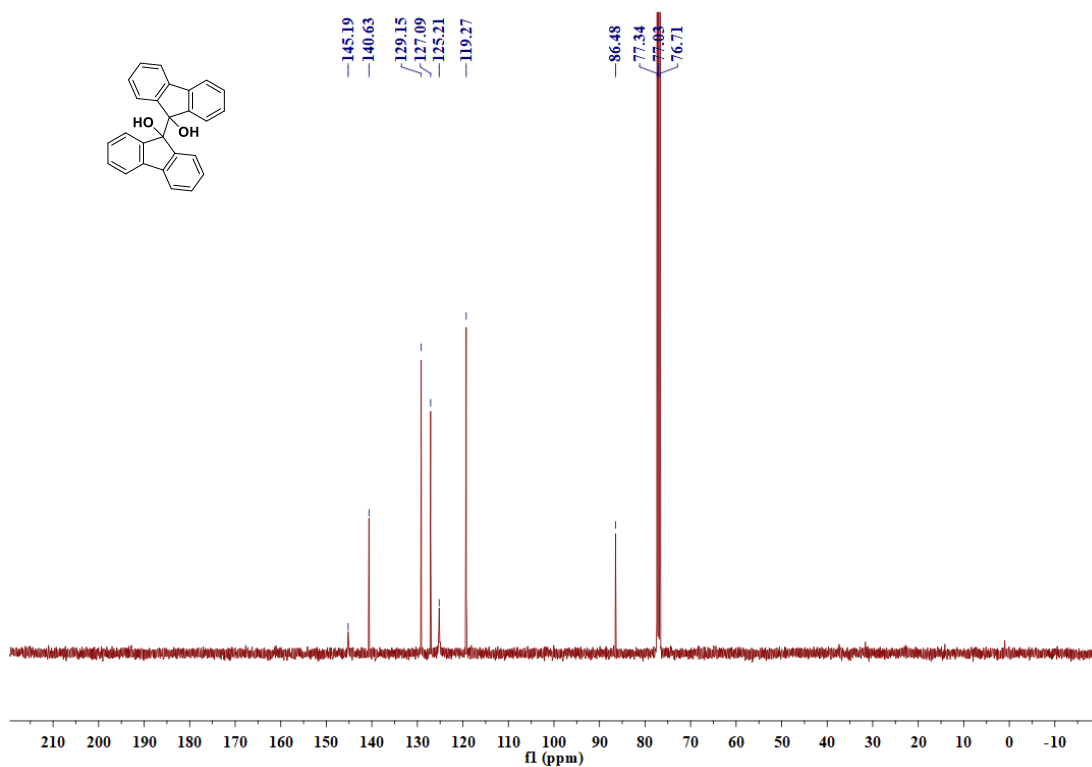

# Aromatic pinacol 4l

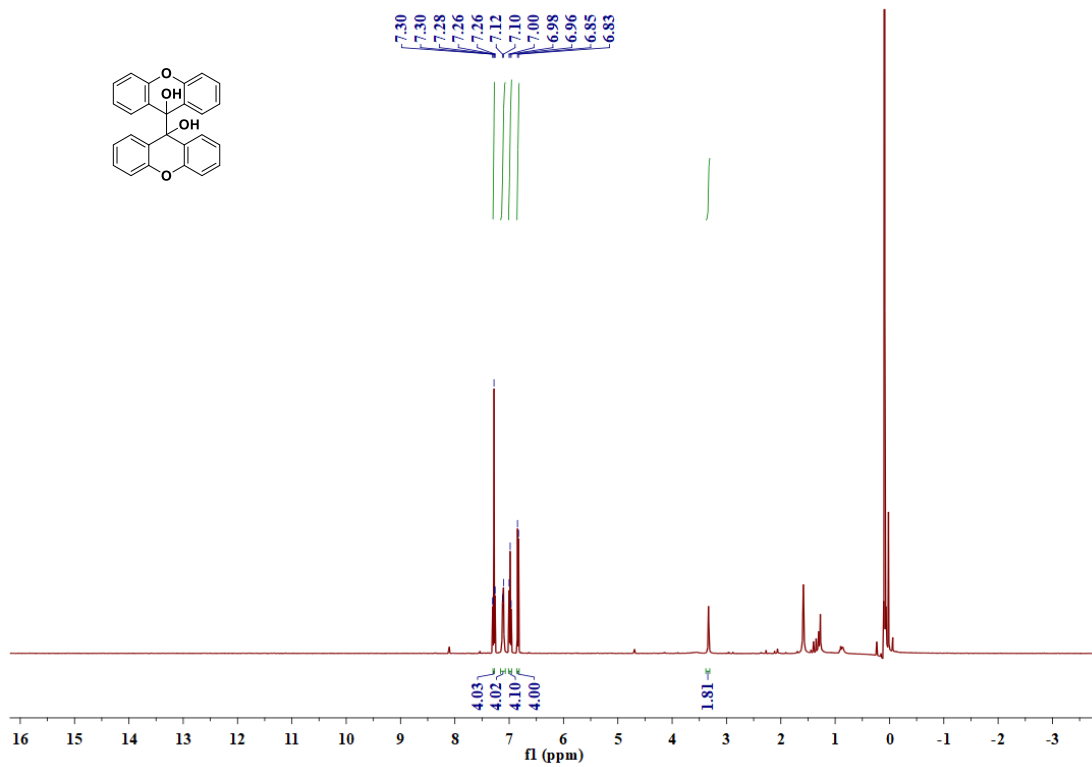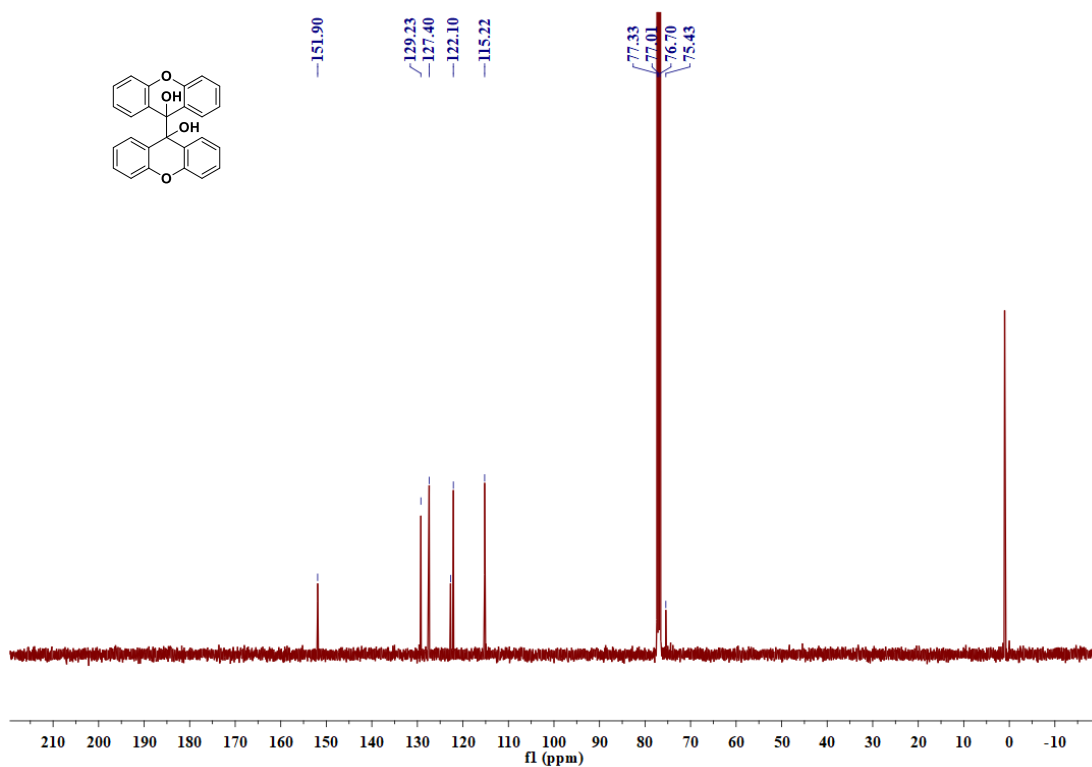

Arylamine 6a

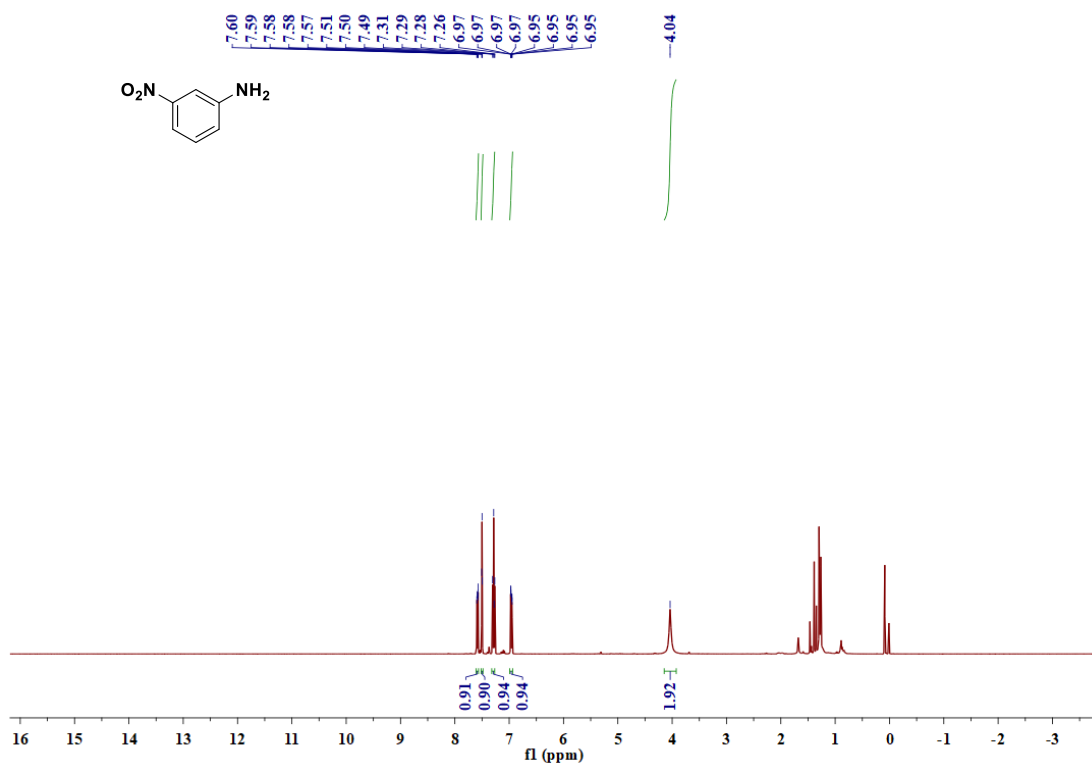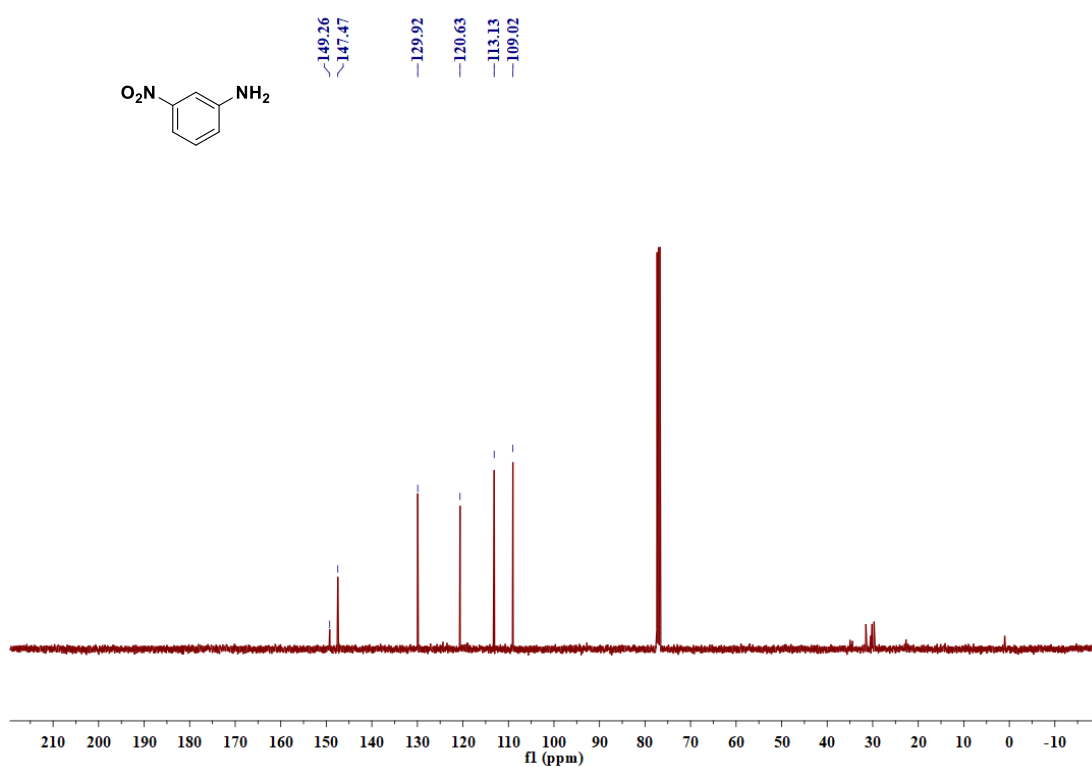

Arylamine 6b

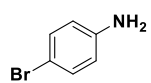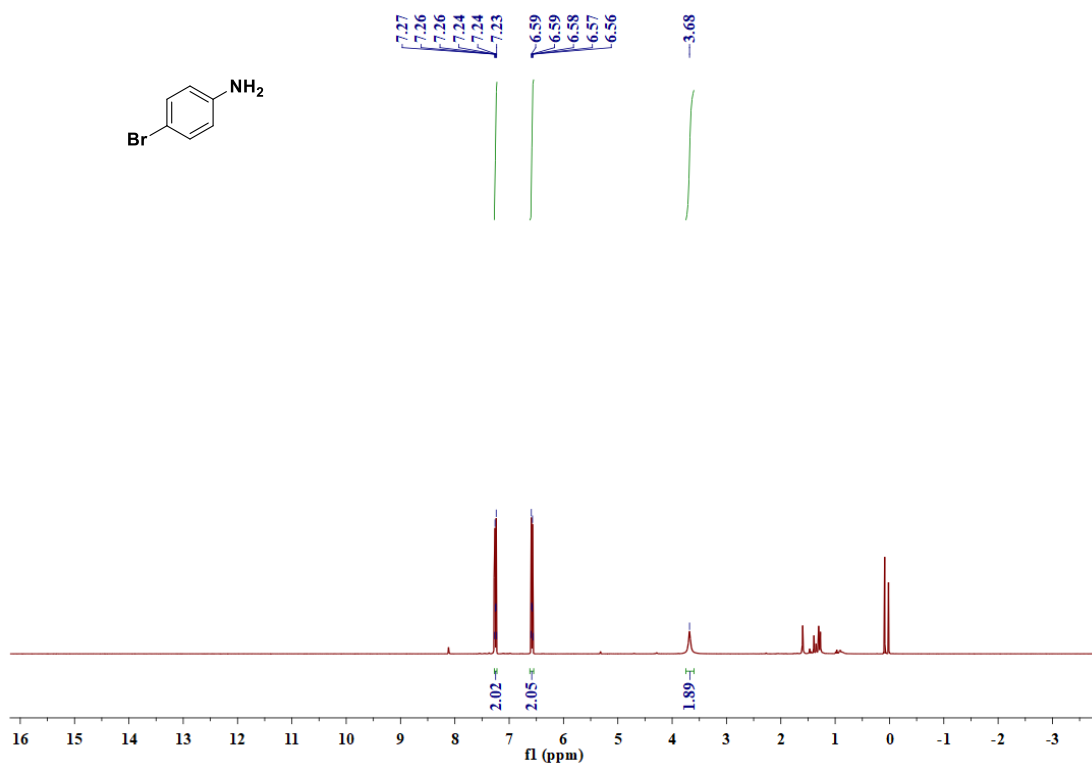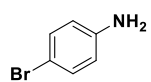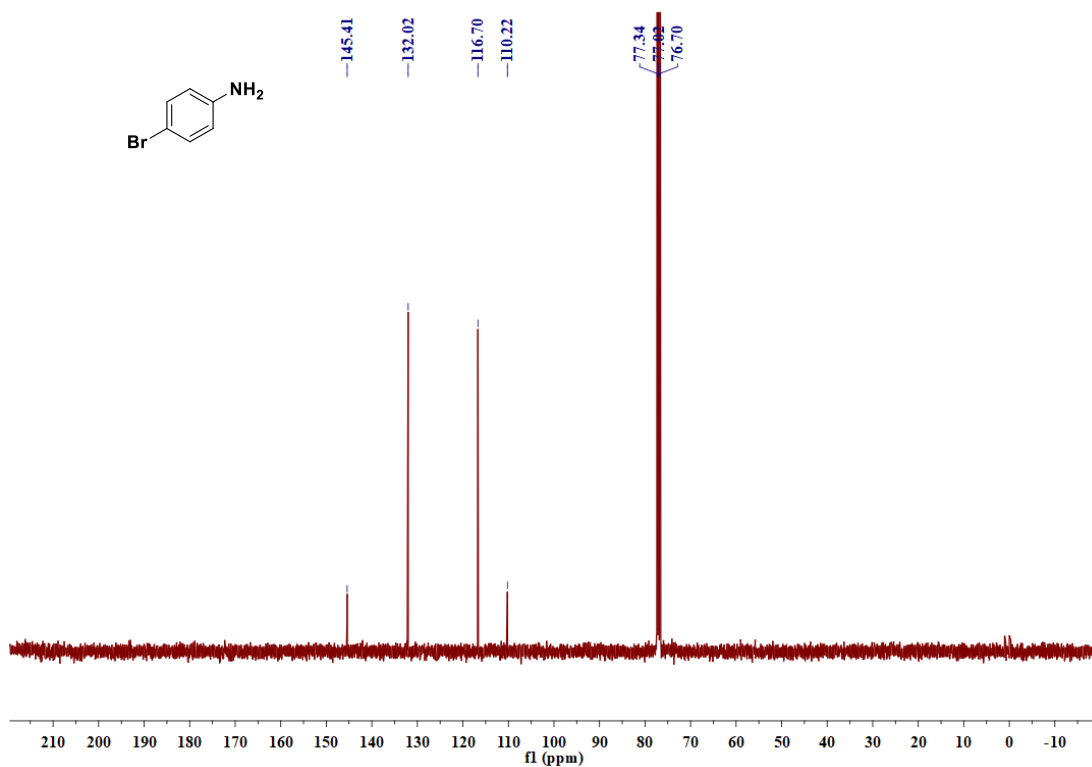

Arylamine 6c

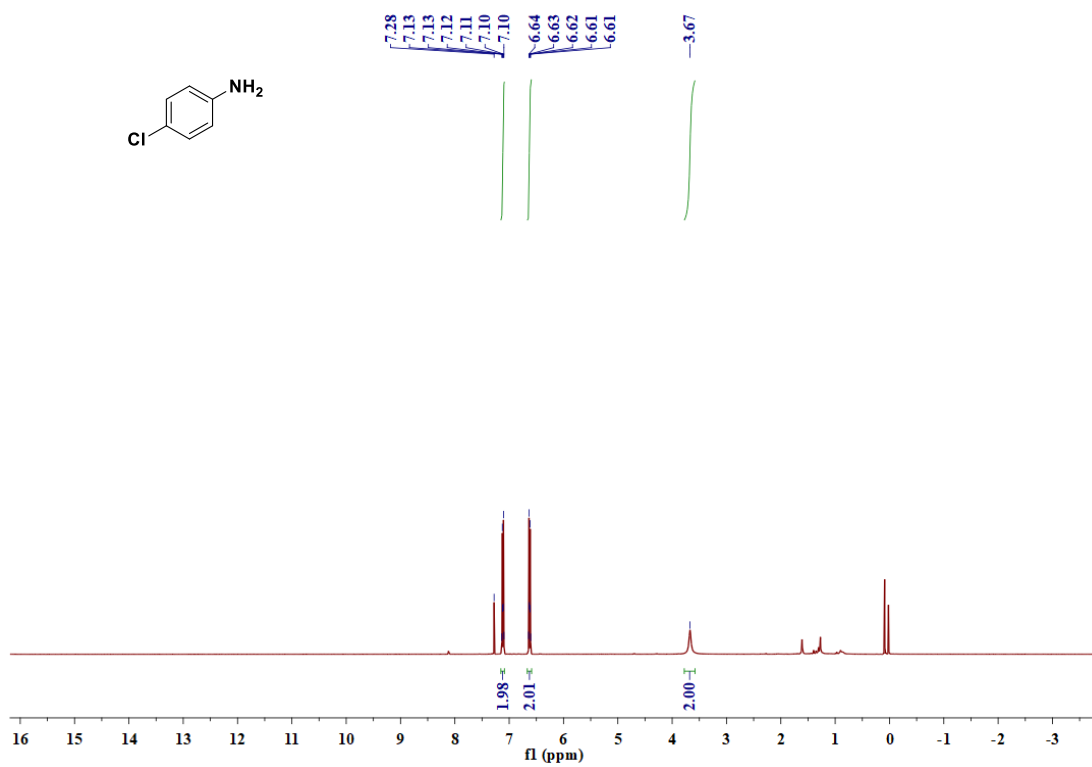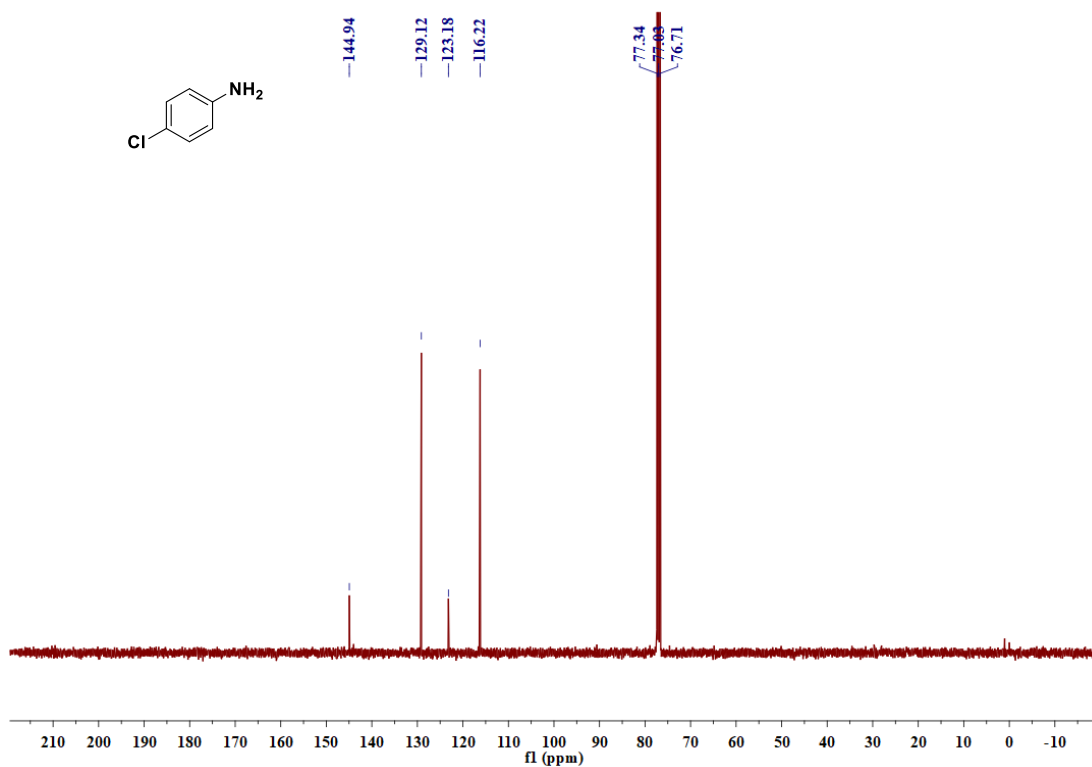

Arylamine 6d

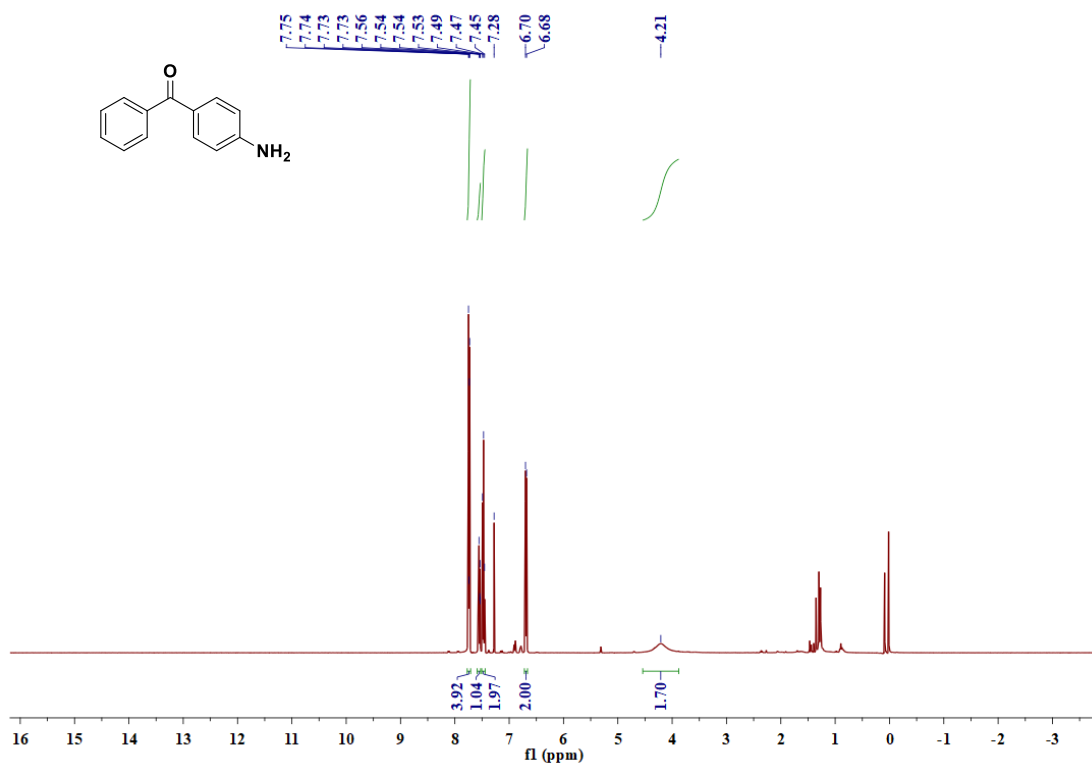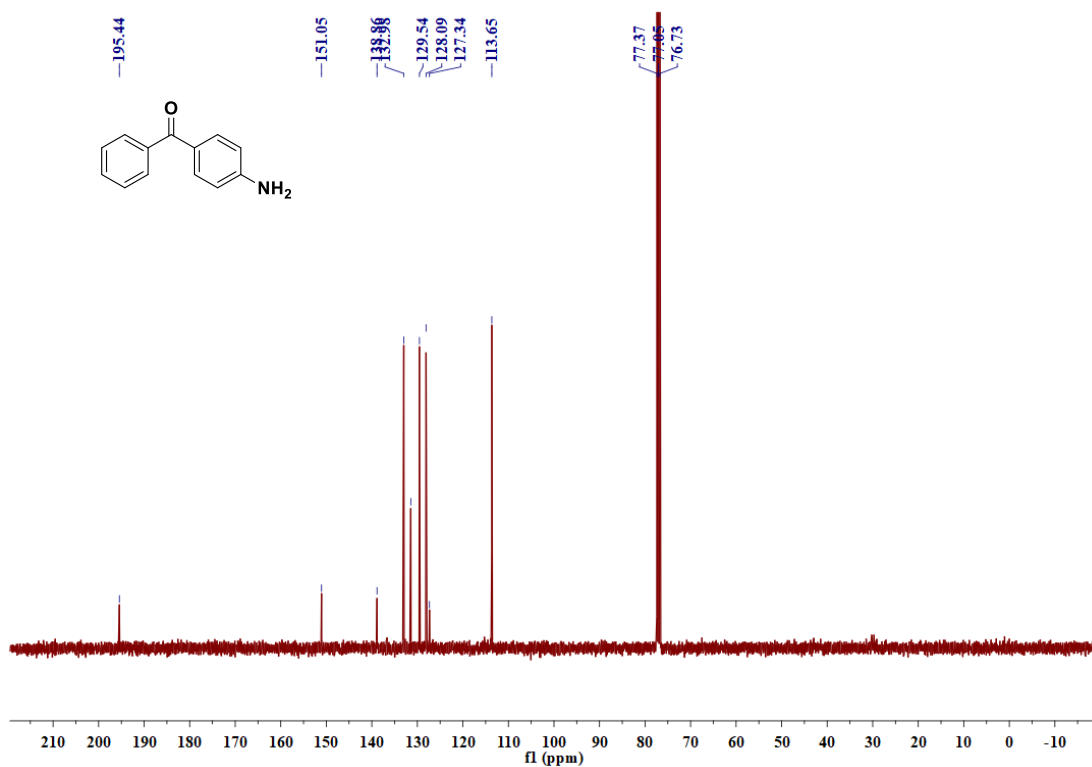

Arylamine 6c

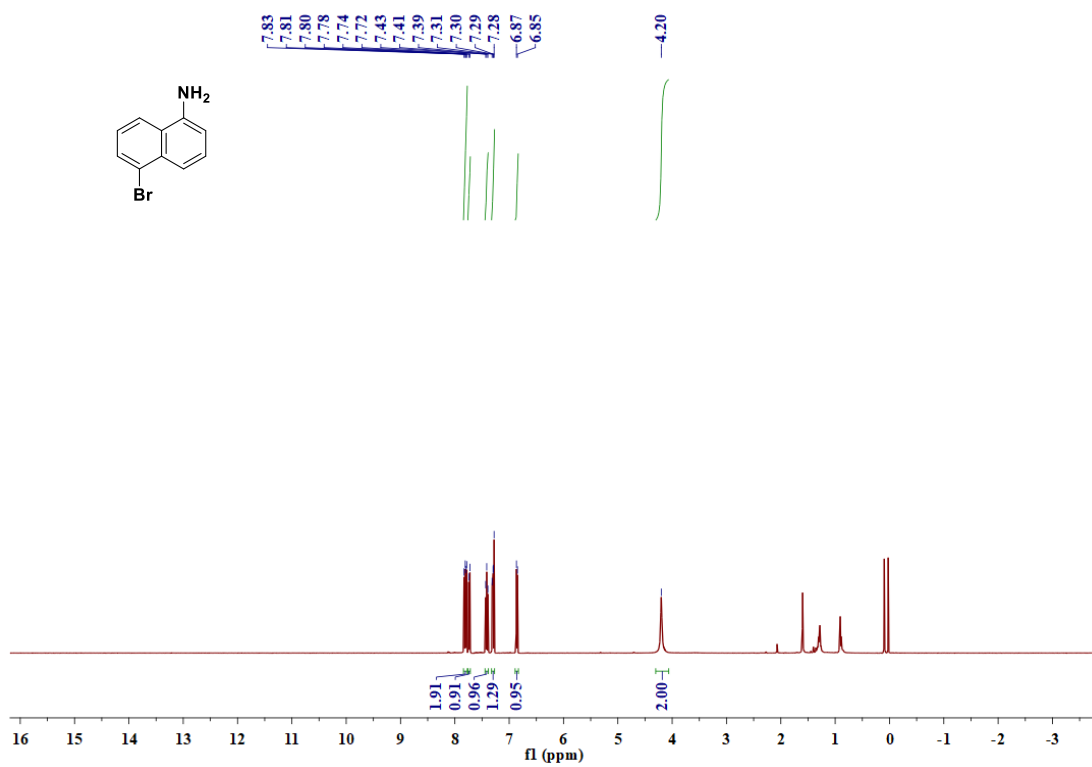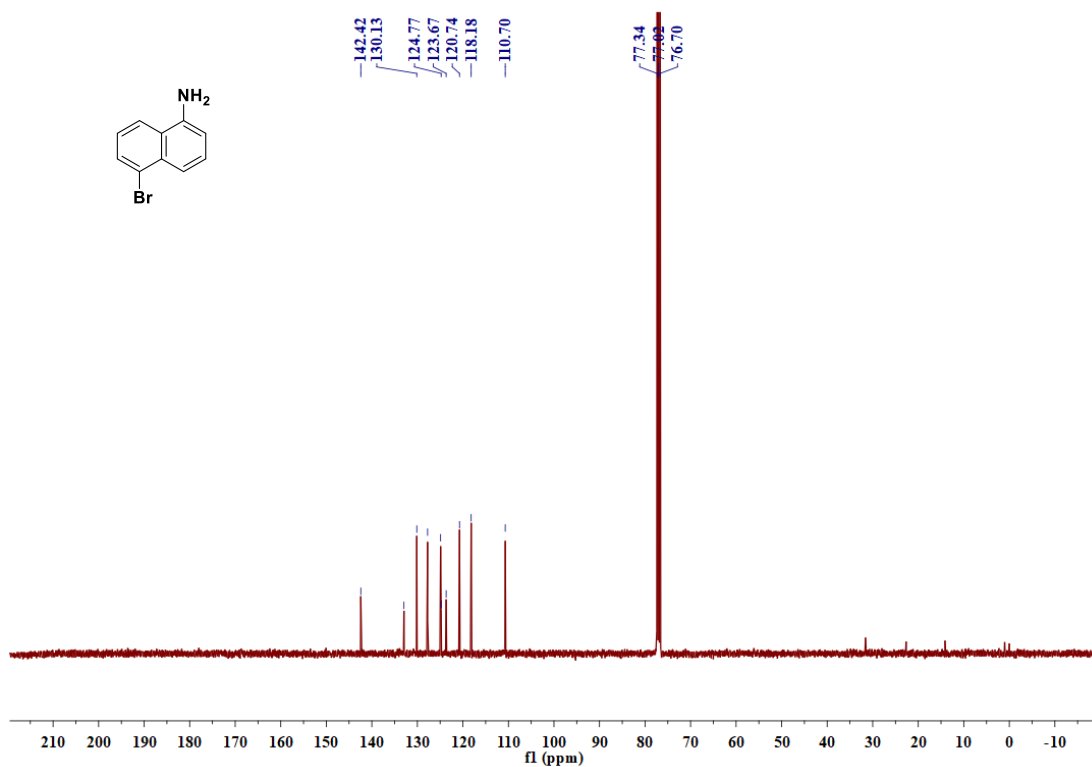



Arylamine 6f

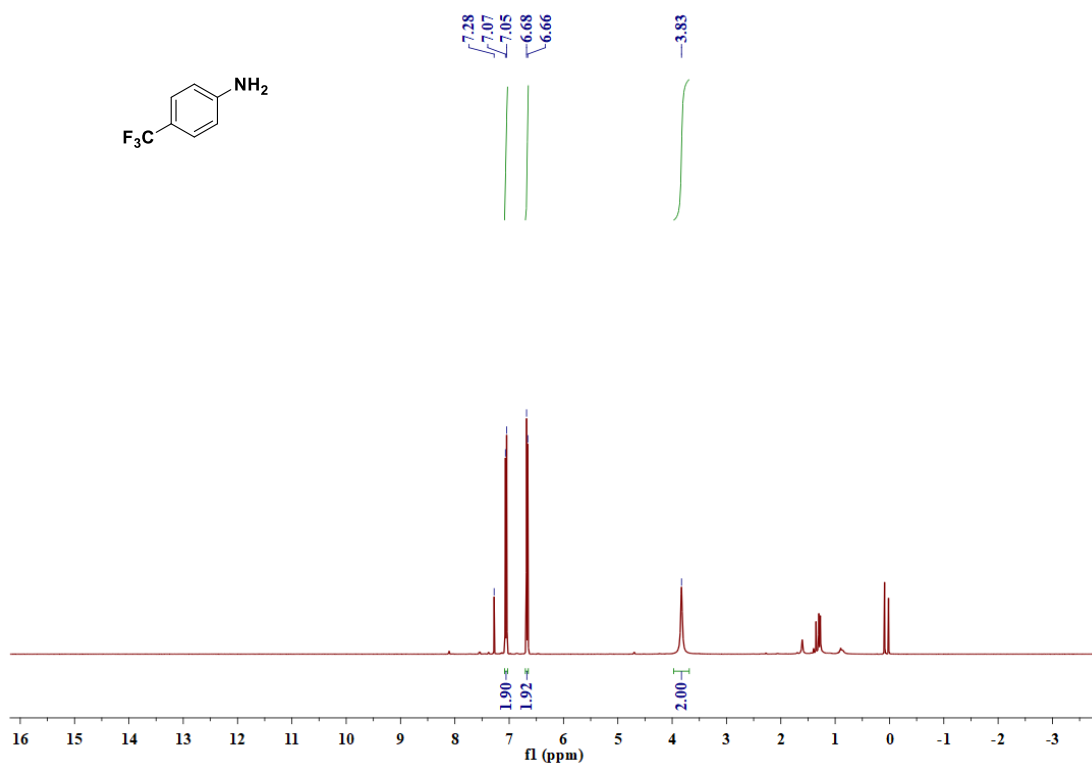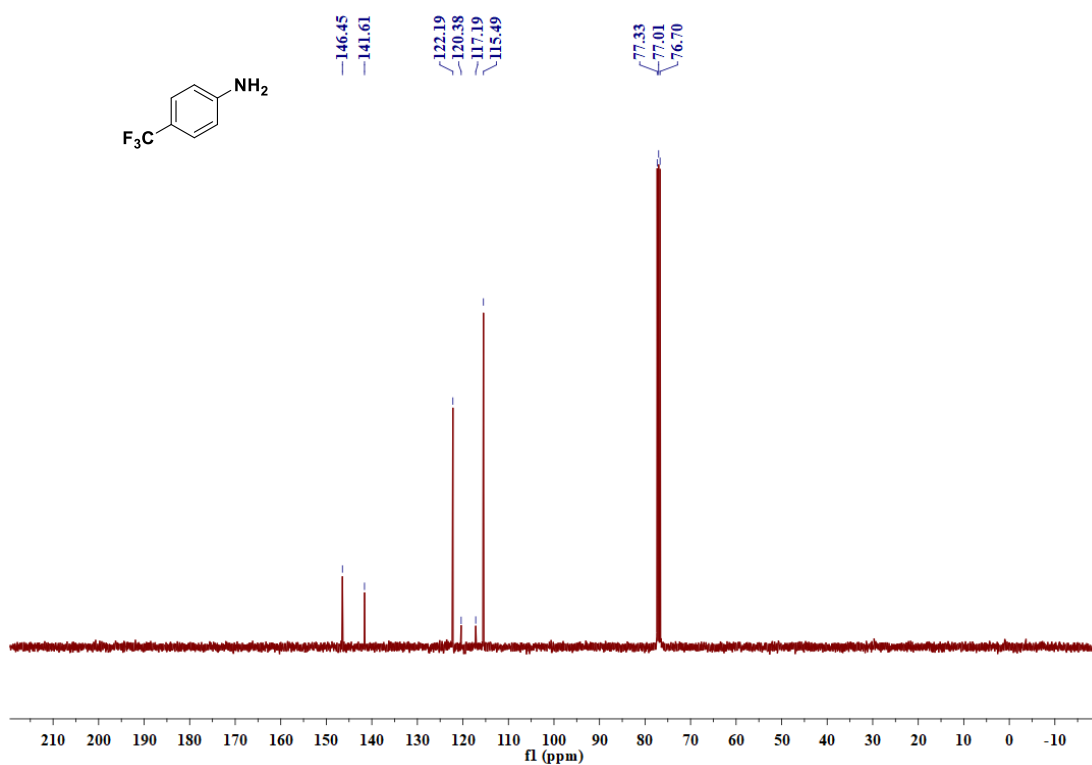

Arylamine 6g

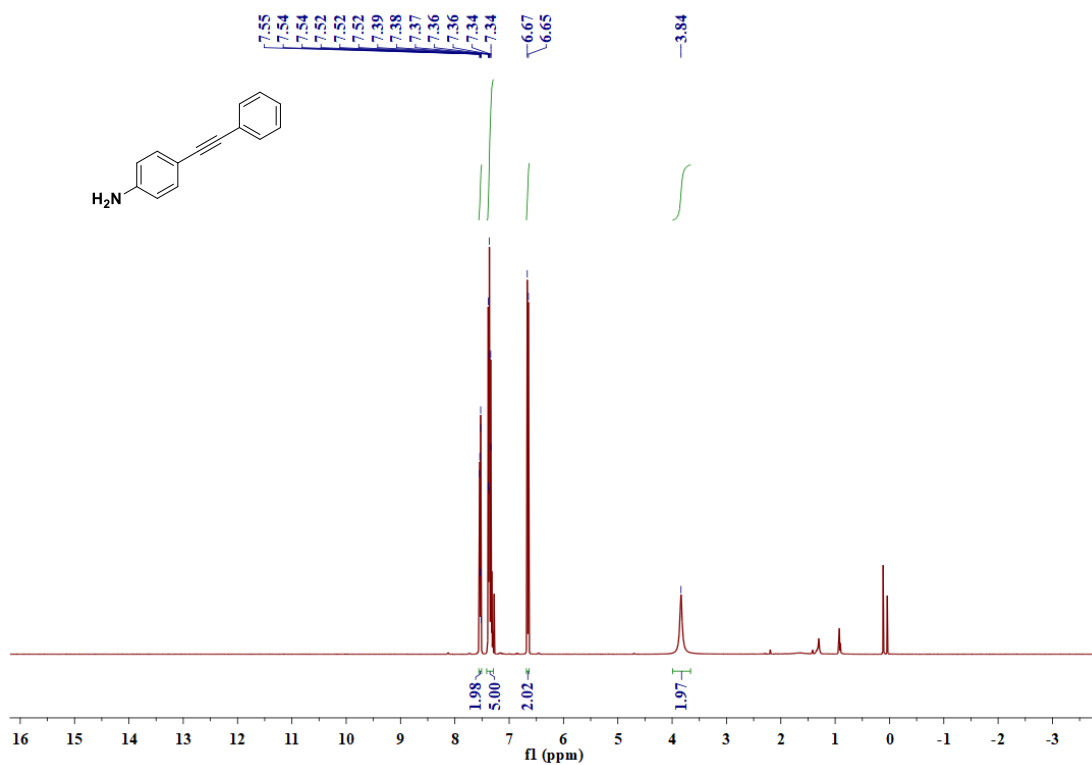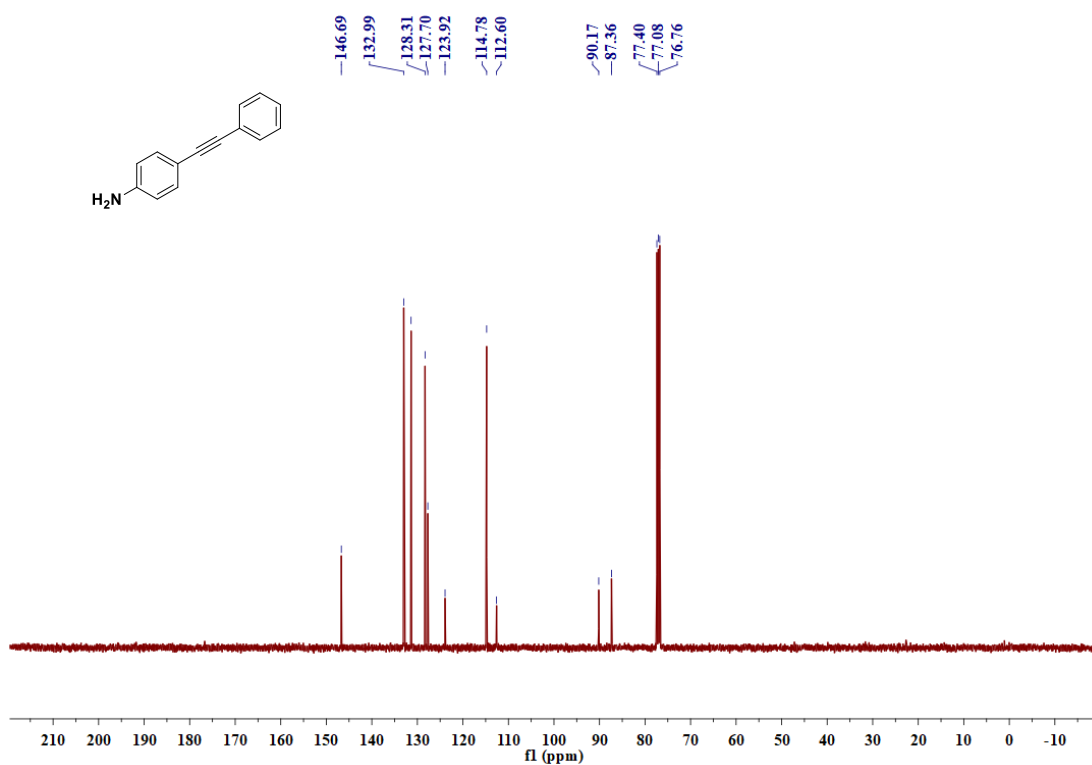

Arylamine 6h

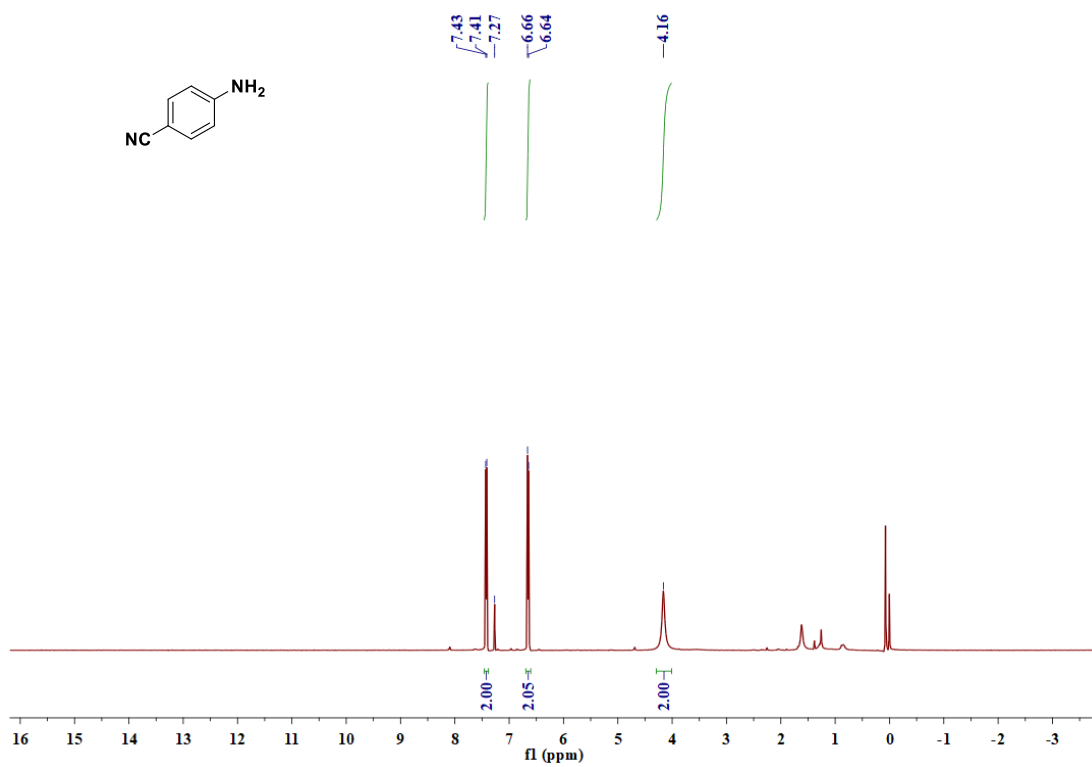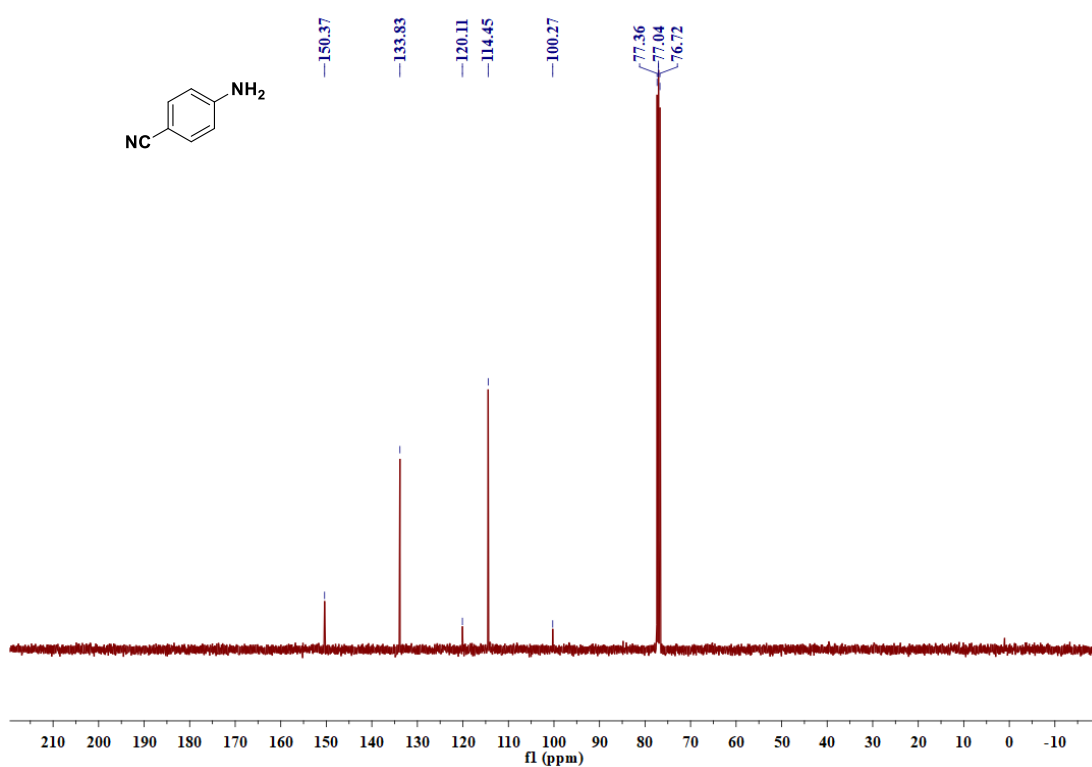

# Arylamine 6i

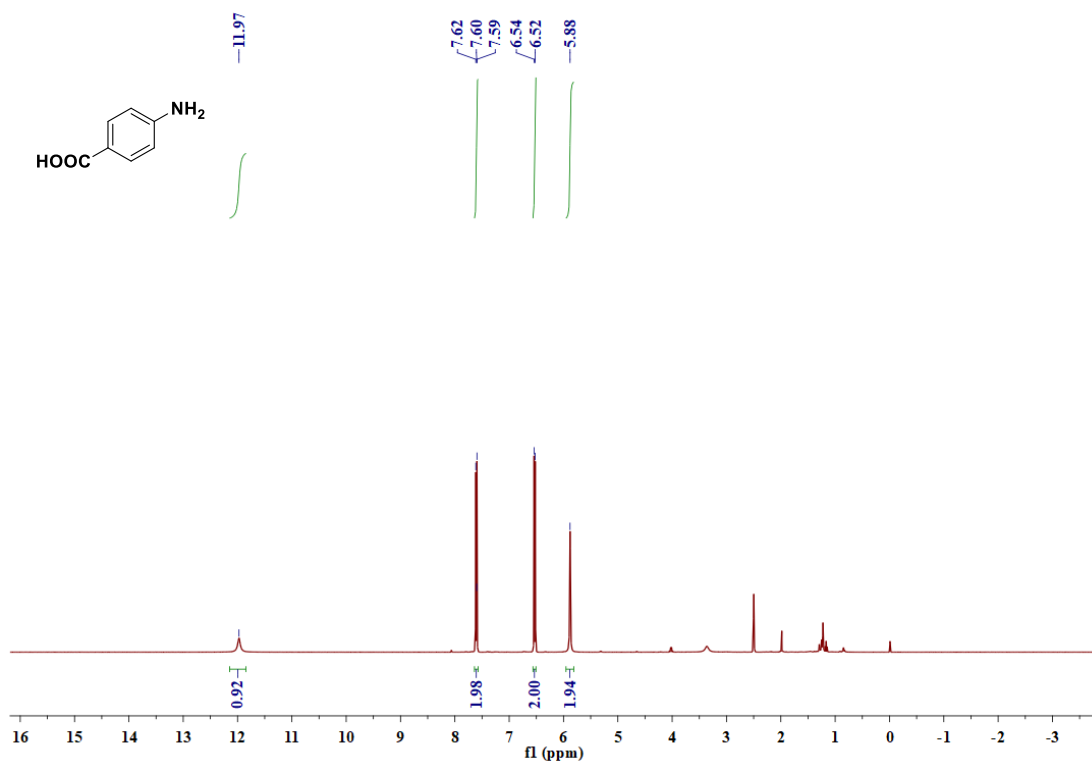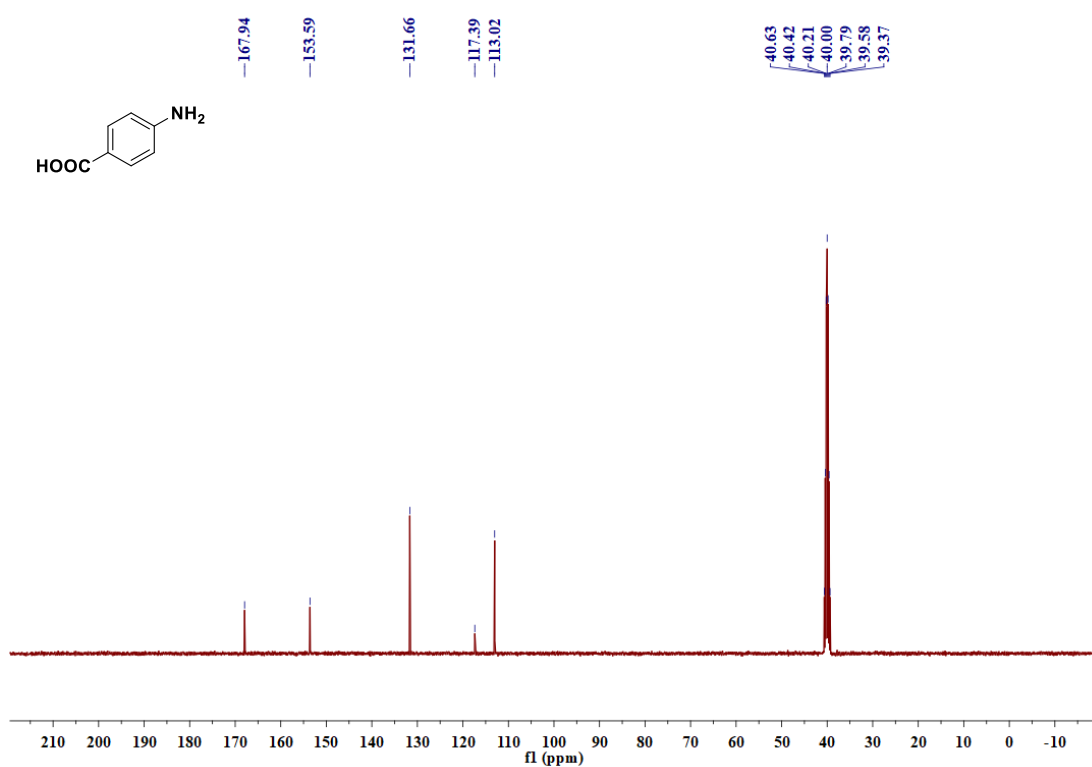

# Arylamine 6j

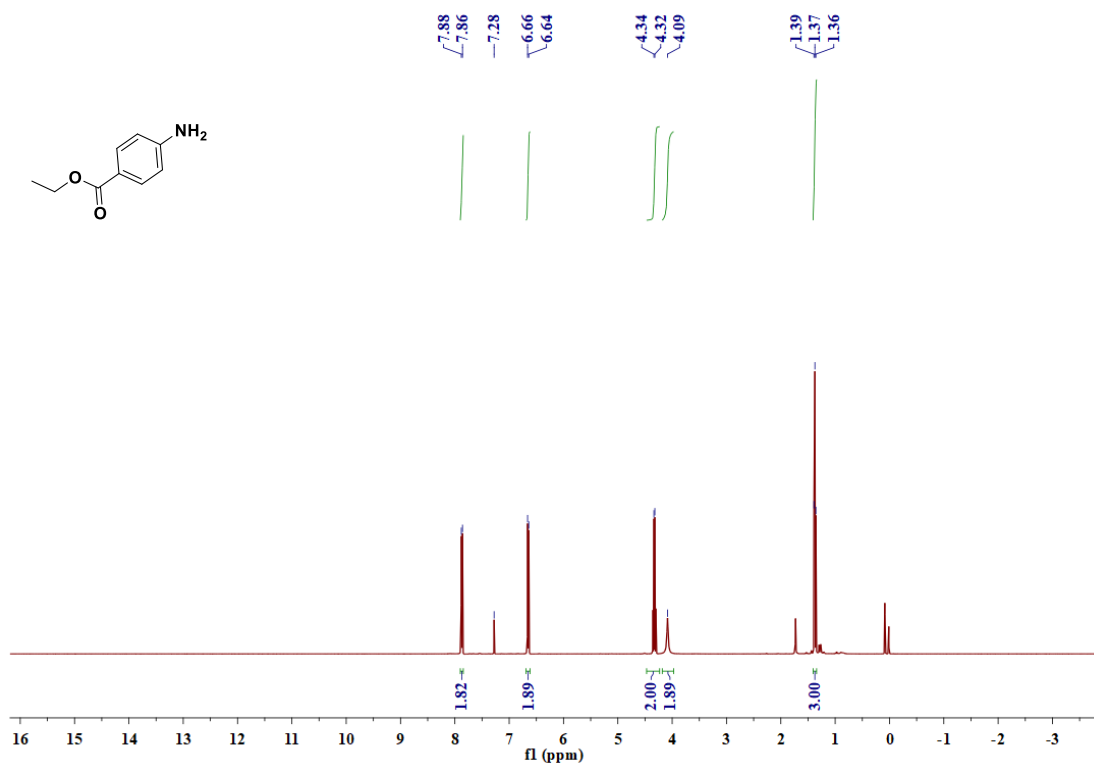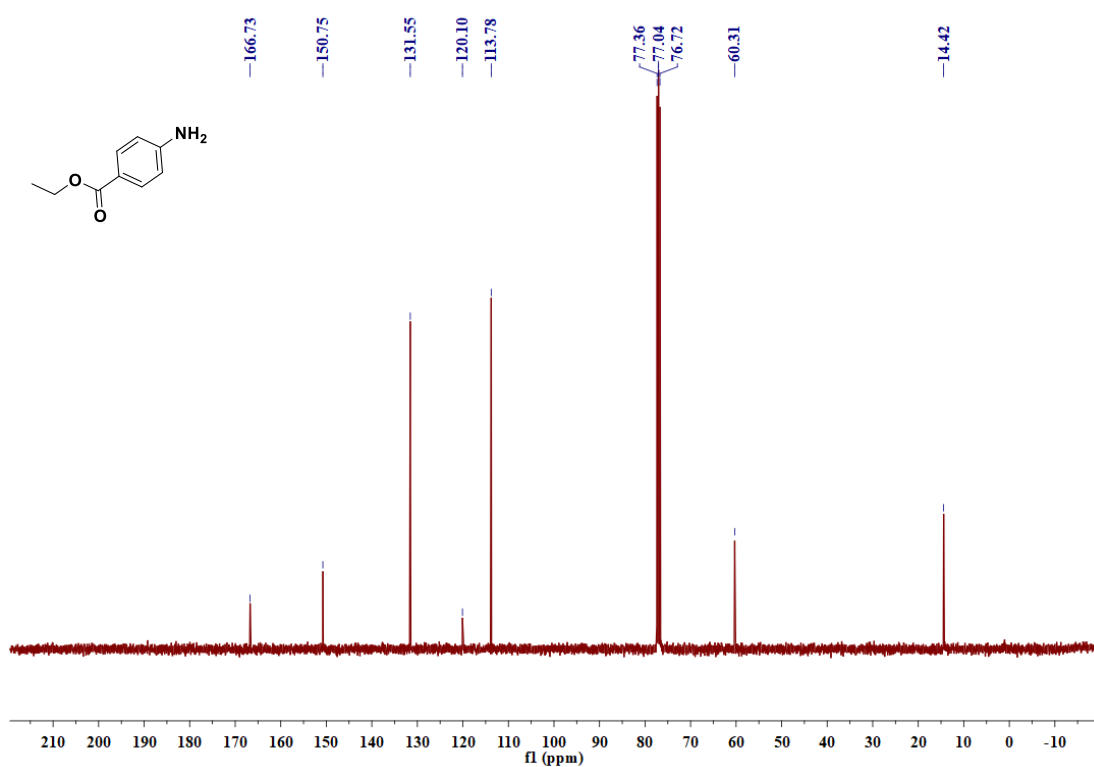

# Arylamine 6k

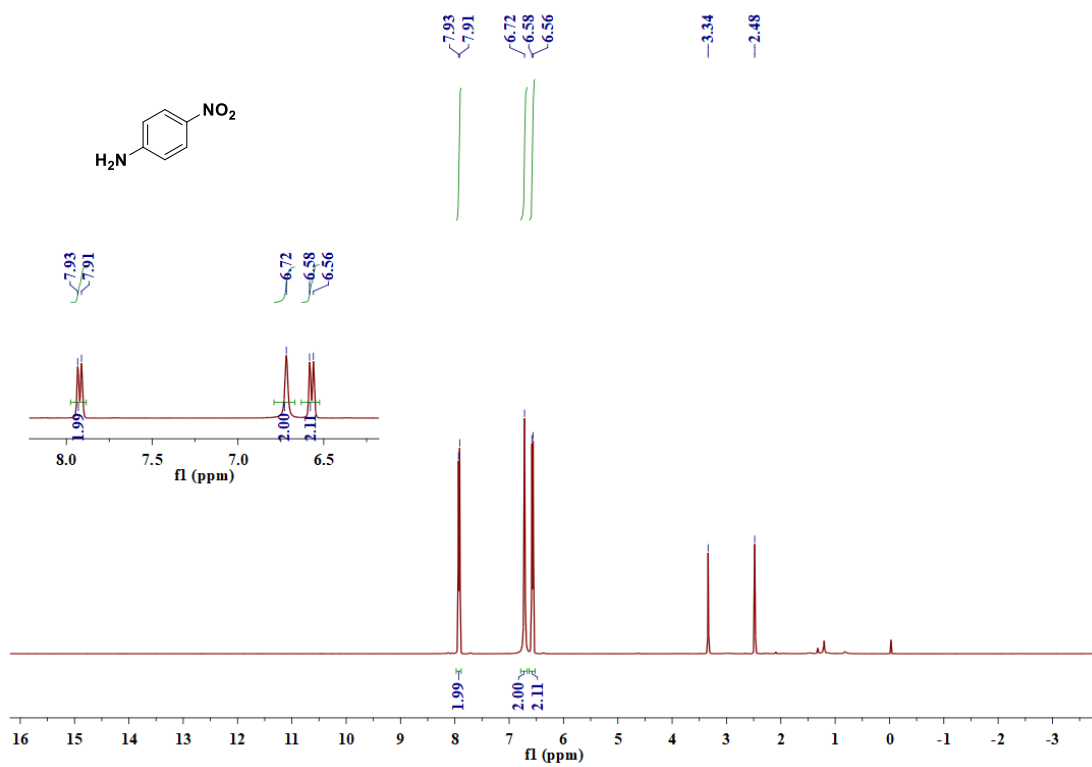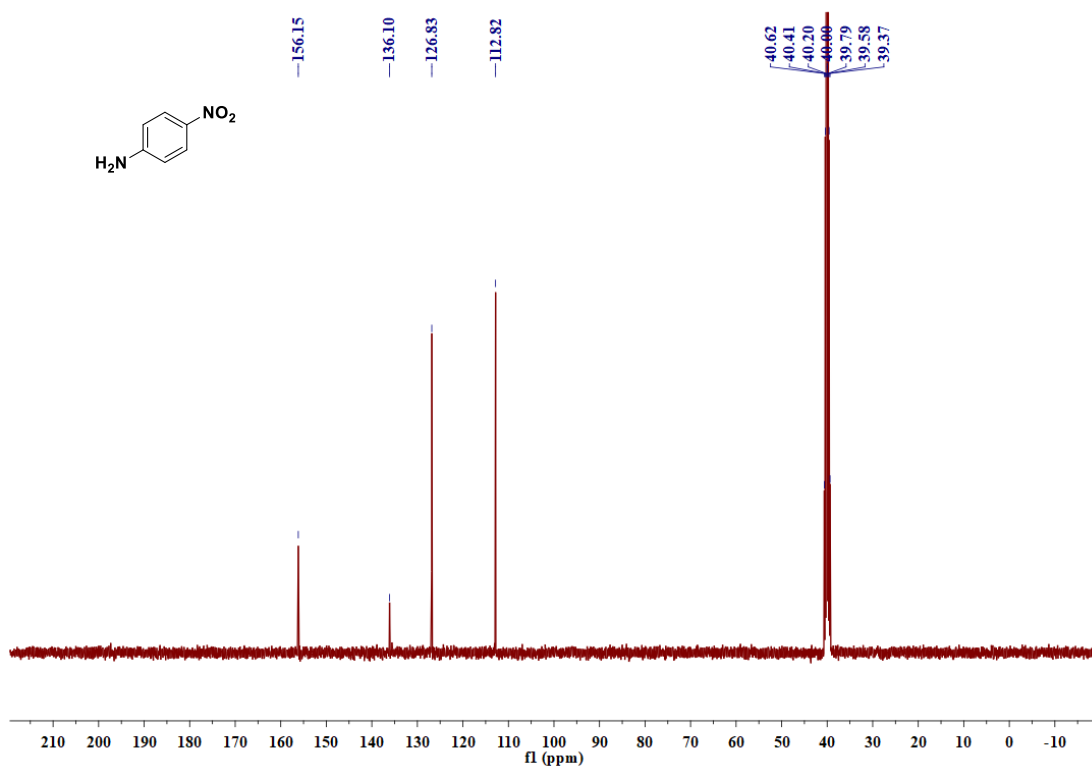

# Arylamine 6l

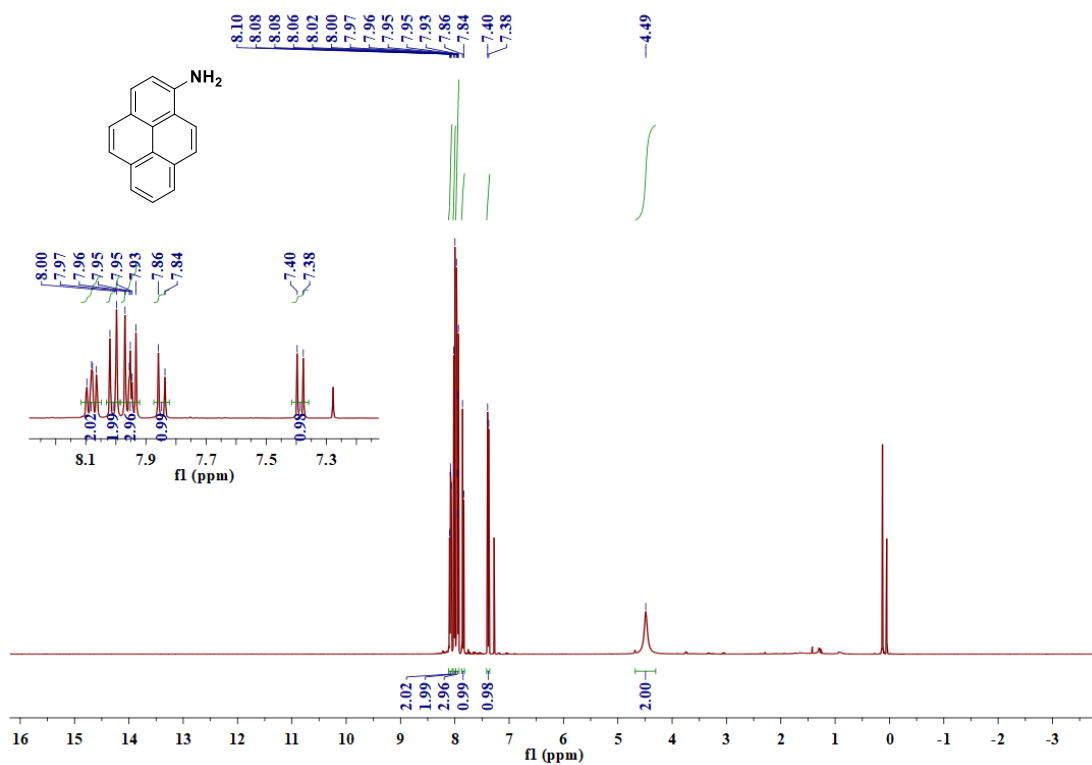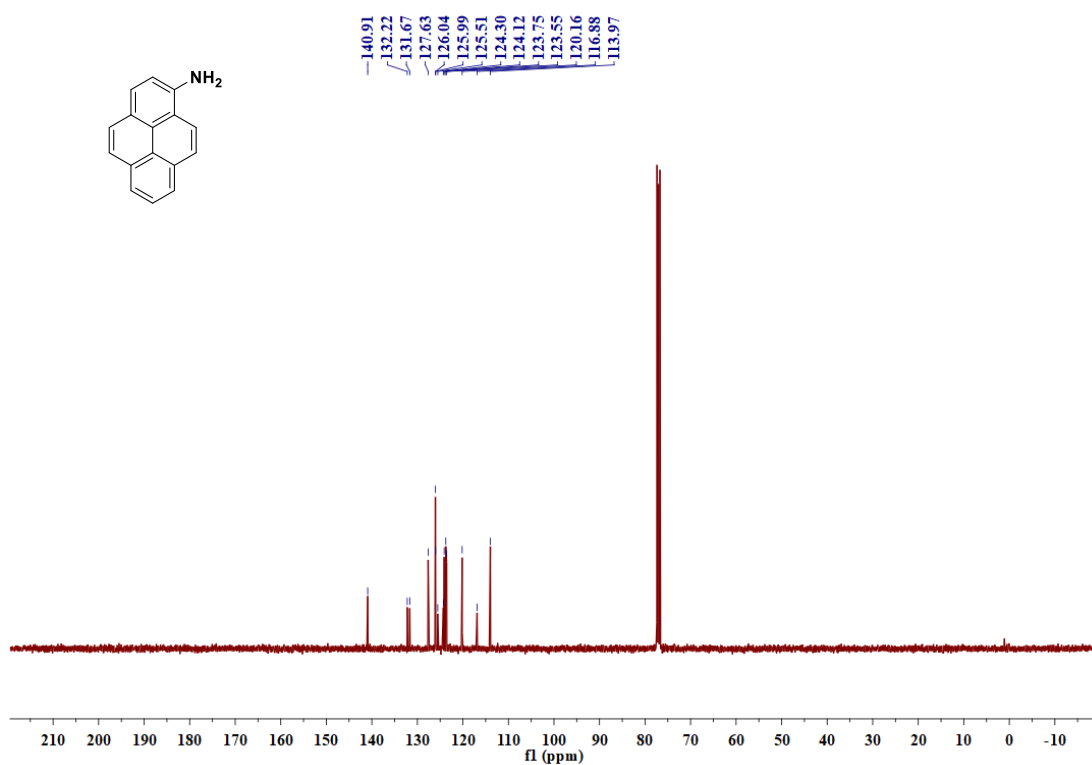

Arylamine 6m

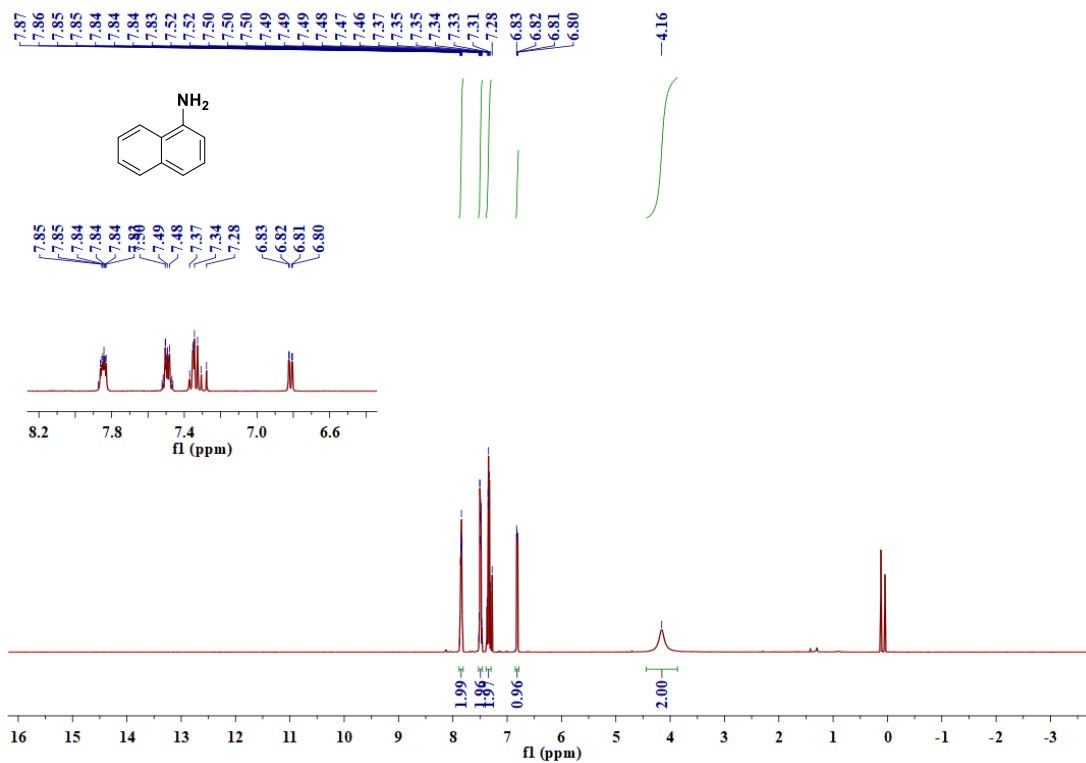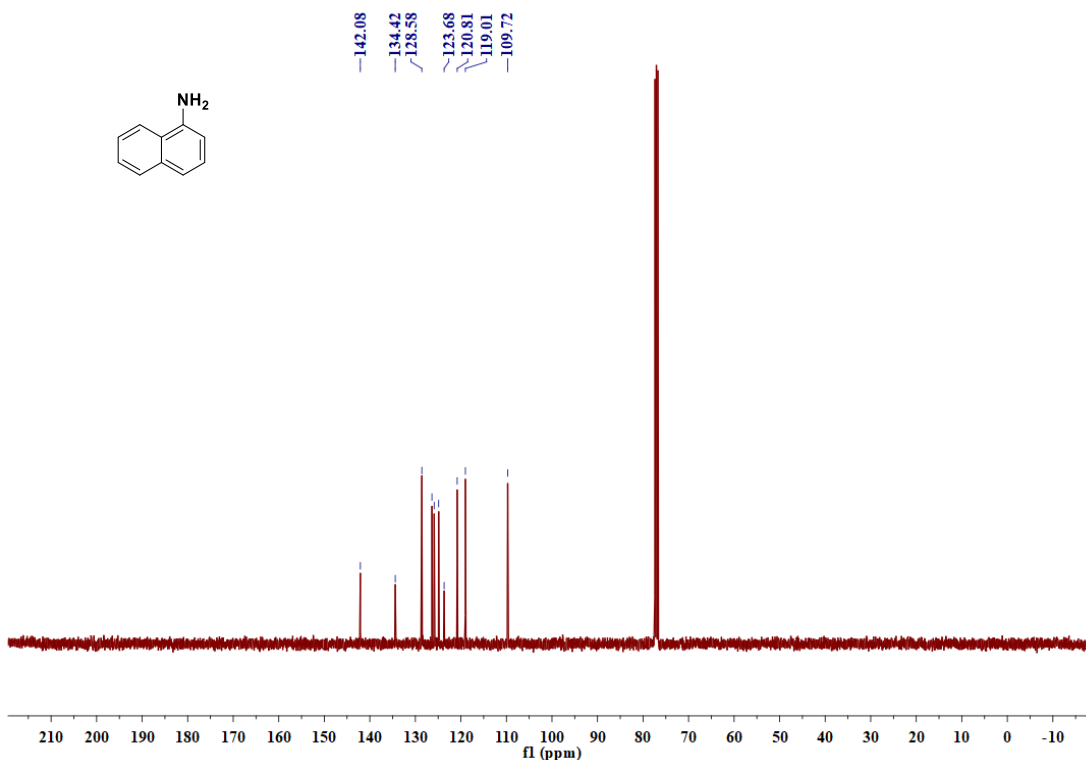



Arylamine 6n

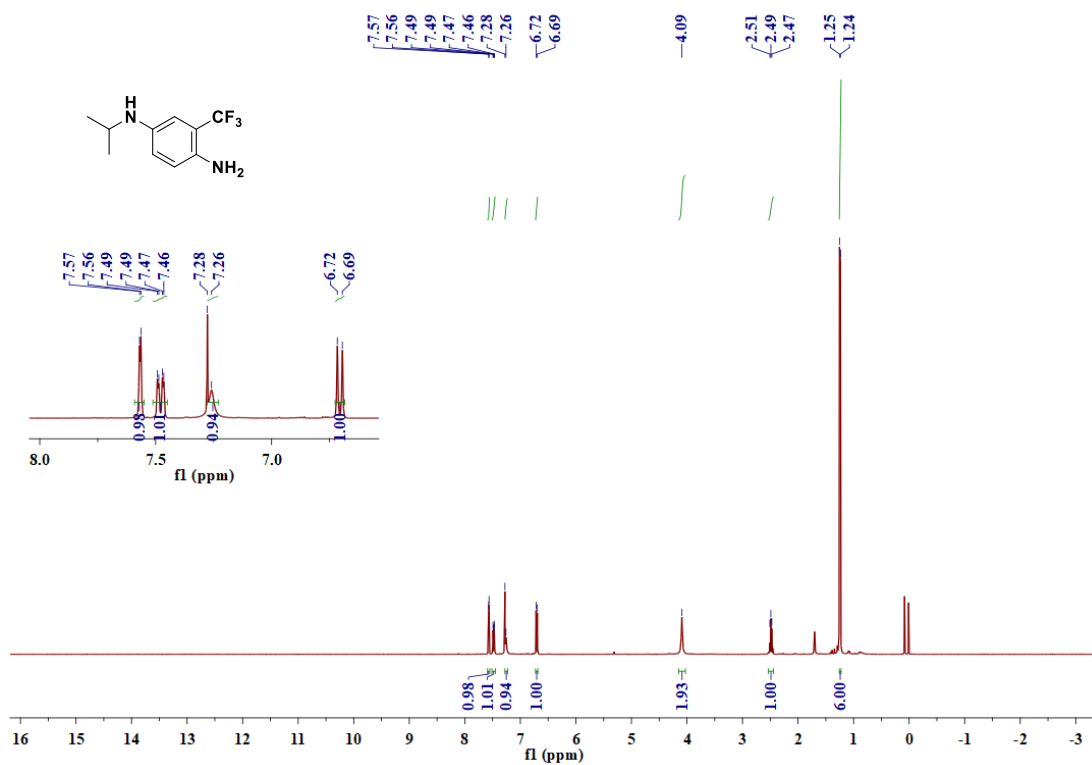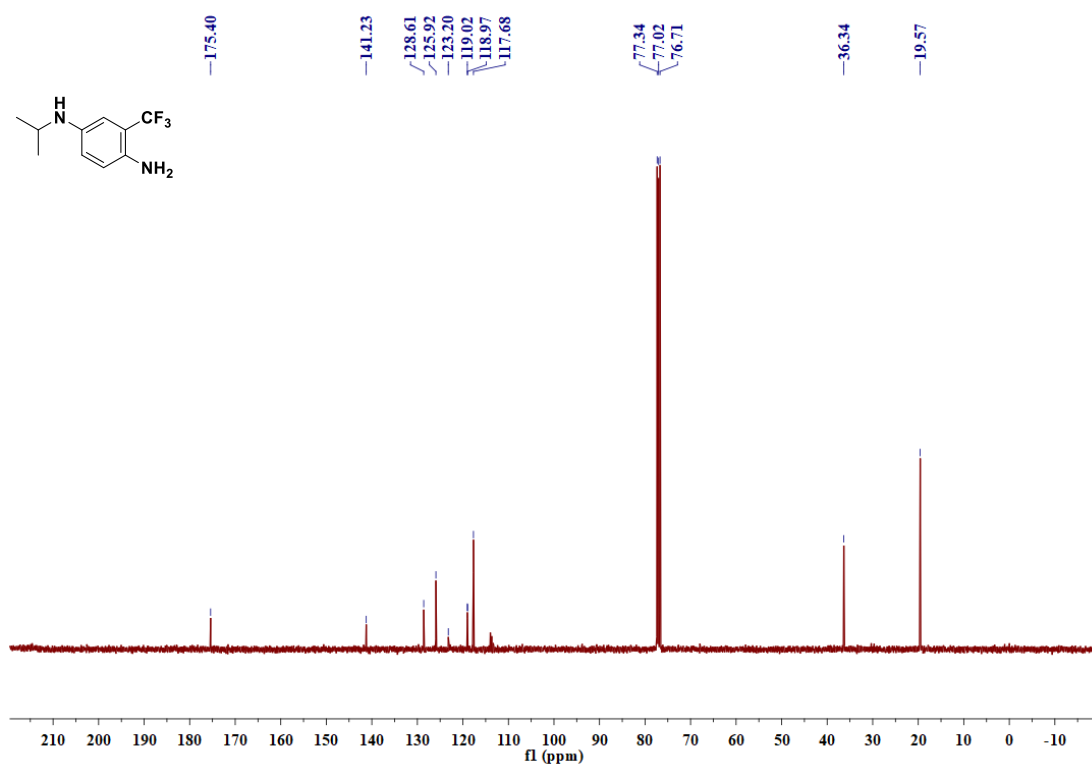

Sulfide 8a

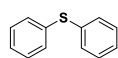

7.38  
7.38  
7.36  
7.34  
7.32  
7.31  
7.28  
7.28  
7.27  
7.26  
7.25

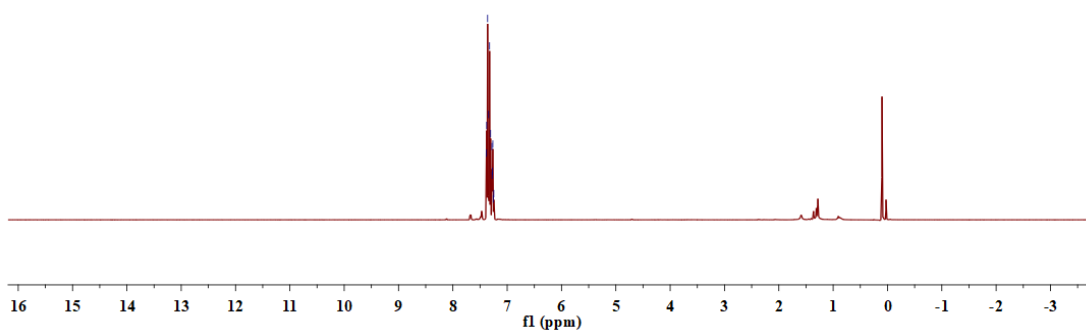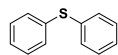

135.79  
131.05  
129.20  
127.05  
77.35  
77.03  
76.72

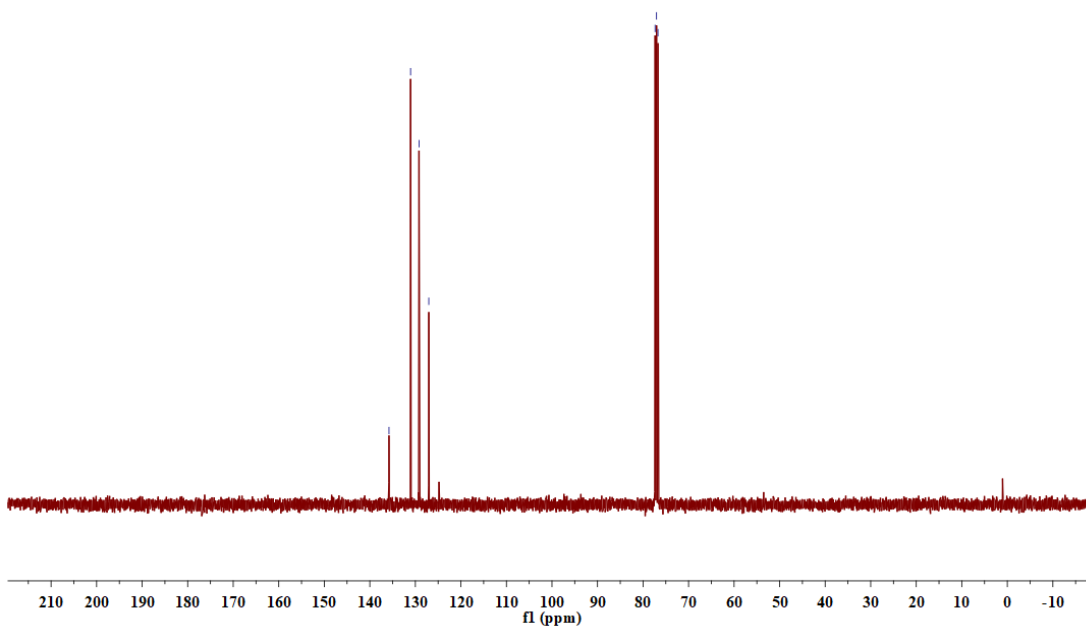

# Sulfide 8b

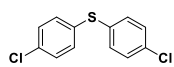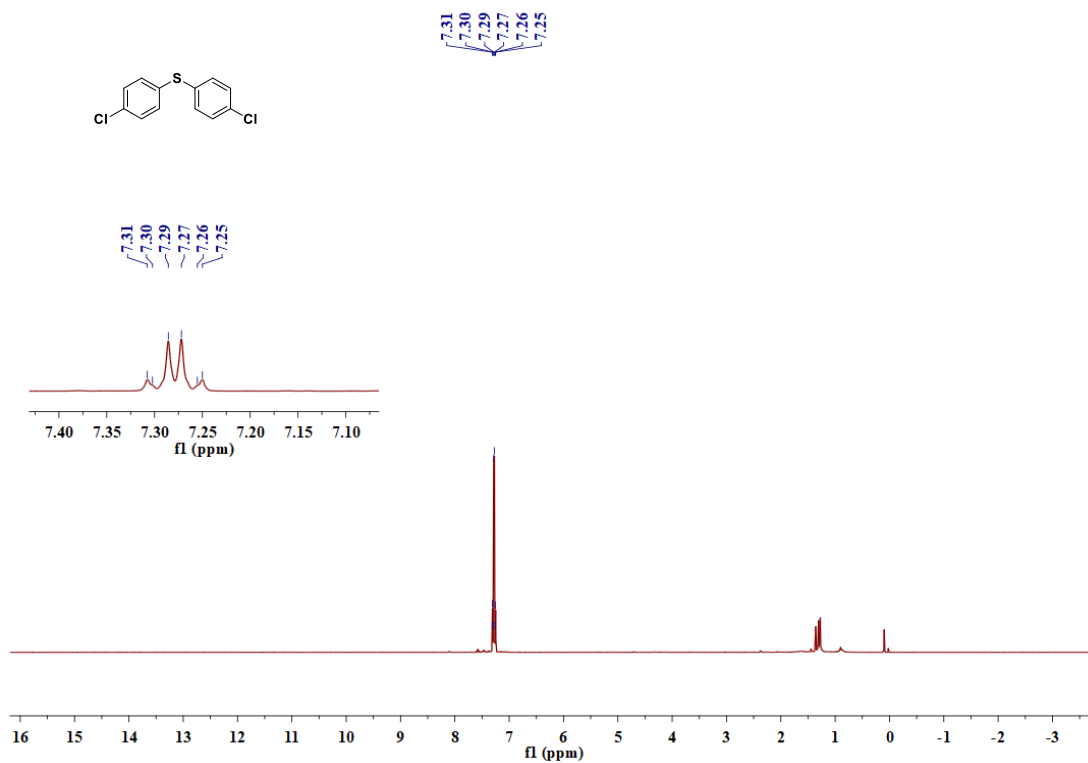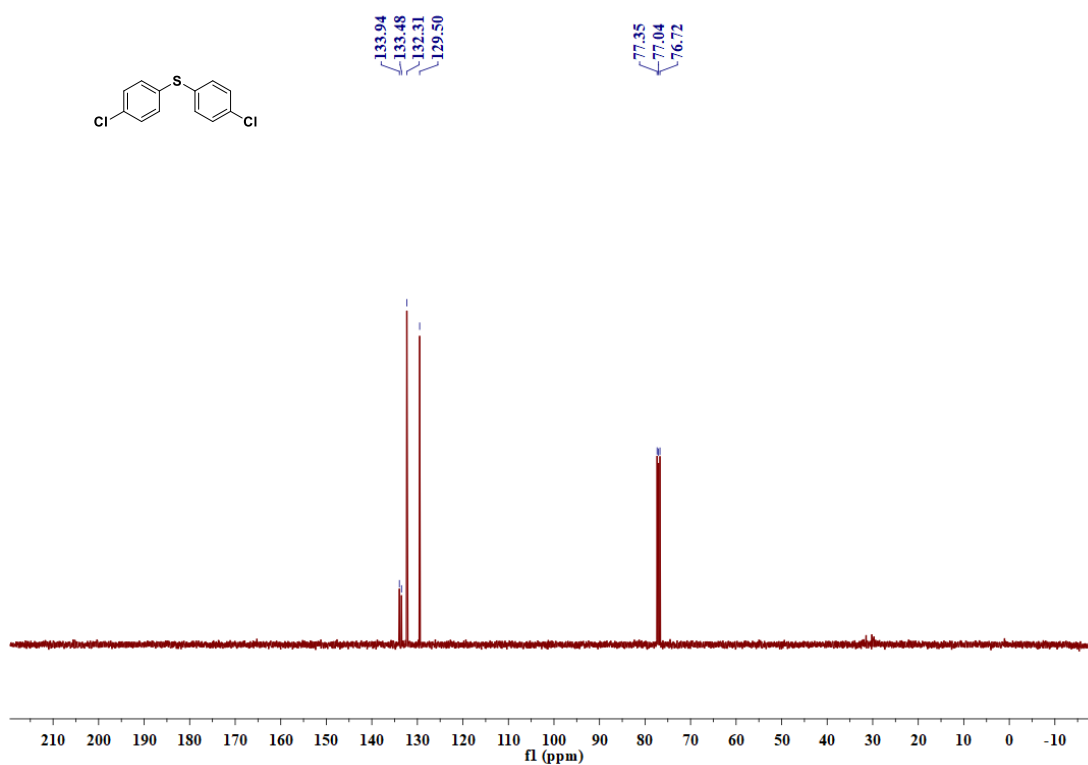

Sulfide 8c

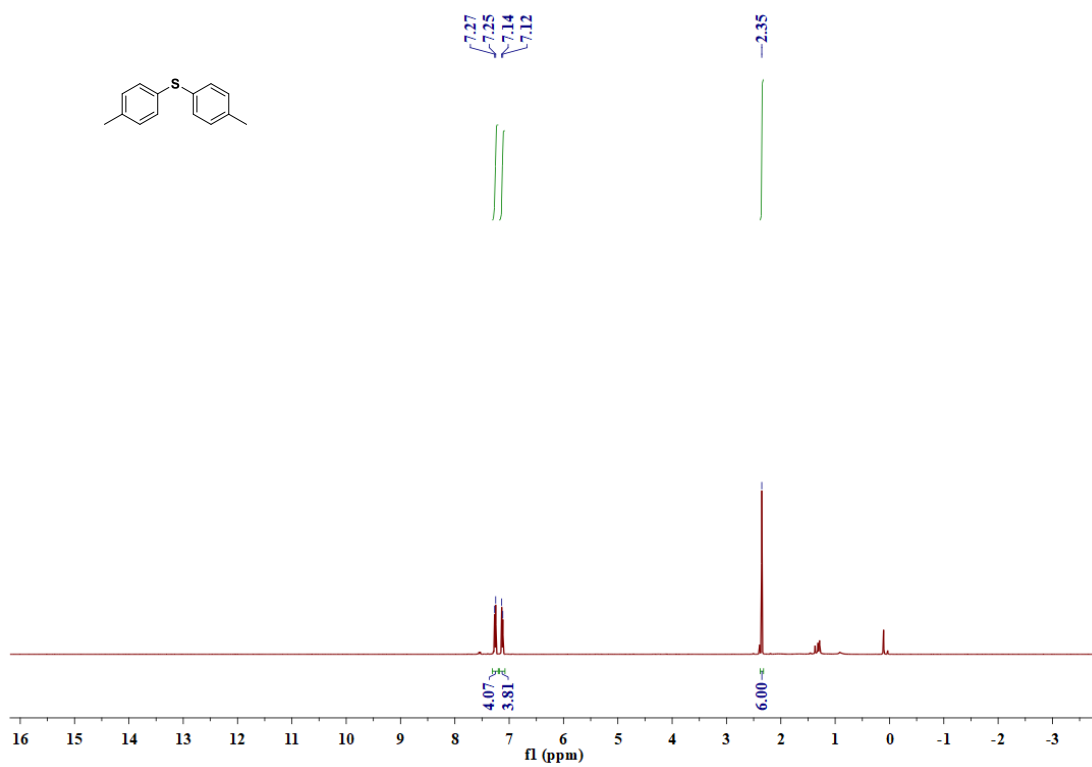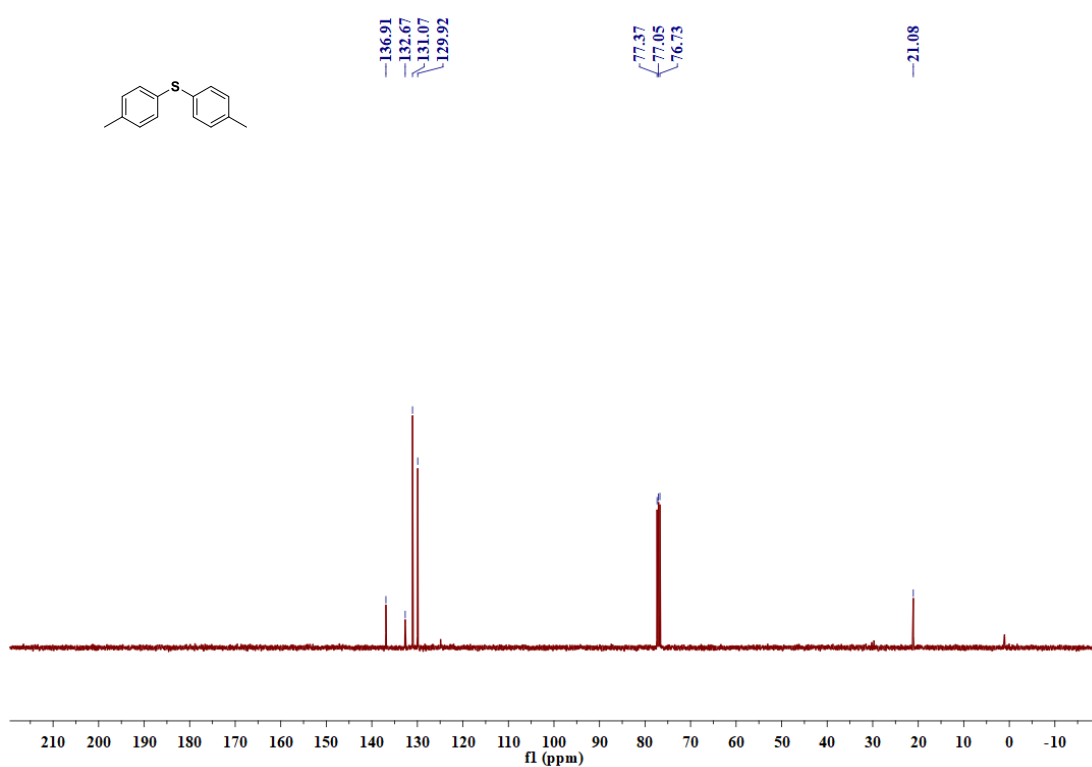

## Reference

- 1 Frisch, M. J., Trucks, G. W., Schlegel, H. B., Scuseria, G. E., Robb, M. A., Cheeseman, J. R., Scalmani, G., Barone, V., Petersson, G. A., Nakatsuji, H., Li, X., Caricato, M., Marenich, A. V., Bloino, J., Janesko, B. G., Gomperts, R., Mennucci, B., Hratchian, H. P., Ortiz, J. V., Izmaylov, A. F., Sonnenberg, J. L., Williams, Ding, F., Lipparini, F., Egidi, F., Goings, J., Peng, B., Petrone, A., Henderson, T., Ranasinghe, D., Zakrzewski, V. G., Gao, J., Rega, N., Zheng, G., Liang, W., Hada, M., Ehara, M., Toyota, K., Fukuda, R., Hasegawa, J., Ishida, M., Nakajima, T., Honda, Y., Kitao, O., Nakai, H., Vreven, T., Throssell, K., Montgomery Jr., J. A., Peralta, J. E., Ogliaro, F., Bearpark, M. J., Heyd, J. J., Brothers, E. N., Kudin, K. N., Staroverov, V. N., Keith, T. A., Kobayashi, R., Normand, J., Raghavachari, K., Rendell, A. P., Burant, J. C., Iyengar, S. S., Tomasi, J., Cossi, M., Millam, J. M., Klene, M., Adamo, C., Cammi, R., Ochterski, J. W., Martin, R. L., Morokuma, K., Farkas, O., Foresman, J. B., and Fox, D. J. *Gaussian 16 Rev. C.01*, Wallingford, CT, 2016.
- 2 (a) Song, S.-Y., Li, Y., Ke, Z., and Xu, S. Iridium-Catalyzed Enantioselective C–H Borylation of Diarylphosphinates. *ACS Catal.* 2021, *11*, 13445-13451. (b) Maiti, A., Zhang, F., Krummenacher, I., Bhattacharyya, M., Mehta, S., Moos, M., Lambert, C., Engels, B., Mondal, A., Braunschweig, H., Ravat, P., and Jana, A. Anionic Boron- and Carbon-Based Hetero-Diradicaloids Spanned by a p-Phenylene Bridge. *J. Am. Chem. Soc.* 2021, *143*, 3687-3692.
- 3 Hariharan, P. C., and Pople, J. A. The influence of polarization functions on molecular orbital hydrogenation energies. *Theoret. Chim. Acta.* 1973, *28*, 213-222.
- 4 Fukui, K. The path of chemical reactions - the IRC approach. *Acc. Chem. Res.* 1981, *14*, 363-368.
- 5 Marenich, A. V., Cramer, C. J., and Truhlar, D. G. Universal Solvation Model Based on Solute Electron Density and on a Continuum Model of the Solvent Defined by the Bulk Dielectric Constant and Atomic Surface Tensions. *J. Phys. Chem.* 2009, *113*, 6378-6396.
- 6 Bondi, A. van der Waals Volumes and Radii. *The Journal of Physical Chemistry* 1964, *68*, 441-451.
- 7 CYLview20, Legault, C. Y., Université de Sherbrooke, 2020 (<http://www.cylview.org>)
